# Supplementary material for: Azithromycin Treatment Alters Gene Expression in Inflammatory, Lipid Metabolism, and Cell Cycle Pathways in Well-Differentiated Human Airway Epithelia
Source: PLoS One. 2009 Jun 5;4(6):e5806. doi: 10.1371/journal.pone.0005806 (PMC2688381; doi:10.1371/journal.pone.0005806)
Supplement: Table S2 — (0.84 MB RTF) [file pone.0005806.s003.xls]

## Sheet: Up AZT 6hr vs PBS 6hr
probe.name	z.stat	fdr.BH	fdr.RE	z.pv	t.stat	t.pv	fc2power	mexpcon	mexptrt	gene.name
225328_at	4.613	0.21558	0.7625	0	1.21	0.29274	3.5507	18.2458	64.7854	F-box protein 32
210517_s_at	4.468	0.21558	0.7625	1e-05	0.567	0.601	1.49894	1544.98	2315.84	A kinase (PRKA) anchor protein (gravin) 12
221748_s_at	4.021	1	0.7625	6e-05	1.436	0.22431	1.95591	551.838	1079.35	tensin /// tensin
210854_x_at	3.692	1	0.7625	0.00022	0.869	0.43385	1.58608	905.539	1436.25	solute carrier family 6 (neurotransmitter transporter, creatine), member 8
1558048_x_at	3.615	1	0.7625	0.0003	2.533	0.06448	4.63943	265.738	1232.87	---
202912_at	3.599	1	0.7625	0.00032	1.256	0.27732	1.82007	1700.82	3095.61	adrenomedullin
206300_s_at	3.534	1	0.7625	0.00041	0.204	0.84845	1.14257	1797.24	2053.46	parathyroid hormone-like hormone
209189_at	3.477	1	0.7625	0.00051	0.206	0.84658	1.25111	150.102	187.794	v-fos FBJ murine osteosarcoma viral oncogene homolog
213843_x_at	3.441	1	0.7625	0.00058	0.85	0.44324	1.56712	892.512	1398.67	solute carrier family 6 (neurotransmitter transporter, creatine), member 8
211756_at	3.44	1	0.7625	0.00058	-0.015	0.98879	0.99088	4434.51	4394.05	parathyroid hormone-like hormone /// parathyroid hormone-like hormone
230746_s_at	3.419	1	0.7625	0.00063	1.289	0.26685	1.6156	725.727	1172.48	---
227530_at	3.418	1	0.7625	0.00063	0.455	0.67262	1.49955	398.953	598.252	A kinase (PRKA) anchor protein (gravin) 12
209652_s_at	3.396	1	0.7625	0.00068	1.253	0.27841	2.65502	43.4546	115.373	placental growth factor, vascular endothelial growth factor-related protein
1555266_a_at	3.37	1	0.7625	0.00075	0.948	0.39703	1.82597	90.8079	165.812	additional sex combs like 2 (Drosophila)
234675_x_at	3.355	1	0.7625	0.00079	2.778	0.04992	3.38013	1156.53	3909.21	CDNA: FLJ23566 fis, clone LNG10880
216627_s_at	3.234	1	0.91765	0.00122	0.681	0.53352	1.92902	154.792	298.598	UDP-Gal:betaGlcNAc beta 1,4- galactosyltransferase, polypeptide 1
227529_s_at	3.113	1	1	0.00185	0.563	0.60377	1.68886	176.335	297.805	A kinase (PRKA) anchor protein (gravin) 12
224997_x_at	3.1	1	1	0.00193	0.582	0.59182	1.66943	4.57664	7.64038	H19, imprinted maternally expressed untranslated mRNA
201123_s_at	3.021	1	1	0.00252	0.098	0.92701	1.0831	2155.71	2334.84	eukaryotic translation initiation factor 5A
210355_at	2.967	1	1	0.003	0.158	0.88198	1.07493	2847.38	3060.75	parathyroid hormone-like hormone
243495_s_at	2.961	1	1	0.00307	0.633	0.5614	1.43797	704.918	1013.65	RAB18, member RAS oncogene family
227952_at	2.923	1	1	0.00347	1.261	0.27579	2.49828	51.9506	129.787	Hypothetical protein FLJ90036
203426_s_at	2.919	1	1	0.00351	1.48	0.21304	2.00262	147.714	295.814	insulin-like growth factor binding protein 5
211959_at	2.908	1	1	0.00364	0.621	0.56815	1.29374	4689.29	6066.73	insulin-like growth factor binding protein 5
1569022_a_at	2.86	1	1	0.00423	0.531	0.6238	1.50347	32.9762	49.5787	phosphoinositide-3-kinase, class 2, alpha polypeptide
211958_at	2.852	1	1	0.00435	0.546	0.61406	1.57562	140.041	220.652	insulin-like growth factor binding protein 5
215812_s_at	2.846	1	1	0.00443	1.135	0.31977	1.56107	849.115	1325.53	solute carrier family 6 (neurotransmitter transporter, creatine), member 8 /// similar to sodium-and chloride-dependent creatine transporter
202219_at	2.732	1	1	0.0063	0.616	0.57101	1.33053	3553.82	4728.46	solute carrier family 6 (neurotransmitter transporter, creatine), member 8
218182_s_at	2.692	1	1	0.0071	1.098	0.33393	1.31458	2749.59	3614.57	claudin 1
226237_at	2.684	1	1	0.00728	0.17	0.87347	1.20694	31.5609	38.092	Collagen, type VIII, alpha 1
212105_s_at	2.649	1	1	0.00807	1.118	0.32632	1.56511	432.053	676.21	DEAH (Asp-Glu-Ala-His) box polypeptide 9
1556773_at	2.614	1	1	0.00895	-0.18	0.86564	0.86706	2981.91	2585.49	Parathyroid hormone-like hormone
36711_at	2.612	1	1	0.00901	1.279	0.26992	1.51521	614.957	931.788	v-maf musculoaponeurotic fibrosarcoma oncogene homolog F (avian)
201860_s_at	2.556	1	1	0.0106	0.138	0.8968	1.13654	4137.66	4702.61	plasminogen activator, tissue
216243_s_at	2.511	1	1	0.01203	1.12	0.32542	1.38572	2001.35	2773.3	interleukin 1 receptor antagonist
235342_at	2.493	1	1	0.01267	0.098	0.92628	1.09669	923.415	1012.7	---
1553055_a_at	2.476	1	1	0.0133	0.765	0.48672	1.33653	661.938	884.698	hypothetical protein MGC19764
230543_at	2.469	1	1	0.01356	2.043	0.11062	3.72126	57.1097	212.52	Similar to Chloride intracellular channel protein 4 (Intracellular chloride ion channel protein p64H1)
201110_s_at	2.464	1	1	0.01373	-0.074	0.94489	0.94535	2066.12	1953.2	thrombospondin 1
208962_s_at	2.452	1	1	0.01421	0.367	0.73238	1.30322	503.759	656.508	fatty acid desaturase 1
236223_s_at	2.45	1	1	0.01429	2.397	0.07464	1.77552	306.767	544.671	Transcribed locus
222847_s_at	2.441	1	1	0.01465	1.202	0.29552	1.72484	393.042	677.934	egl nine homolog 3 (C. elegans)
200632_s_at	2.437	1	1	0.01481	0.771	0.48349	1.34441	4658.98	6263.59	N-myc downstream regulated gene 1
206108_s_at	2.427	1	1	0.01524	0.209	0.84498	1.38835	49.7295	69.042	splicing factor, arginine/serine-rich 6
211506_s_at	2.393	1	1	0.01671	2.335	0.07979	1.39056	5393.94	7500.59	interleukin 8
1554878_a_at	2.39	1	1	0.01683	0.702	0.52157	1.25373	1576.78	1976.85	ATP-binding cassette, sub-family D (ALD), member 3
203294_s_at	2.363	1	1	0.01814	0.848	0.44413	1.36328	430.536	586.943	lectin, mannose-binding, 1
212143_s_at	2.332	1	1	0.0197	0.987	0.3796	1.1577	16588.3	19204.3	insulin-like growth factor binding protein 3
201222_s_at	2.328	1	1	0.01994	0.958	0.39218	1.2455	5182.12	6454.35	RAD23 homolog B (S. cerevisiae)
209457_at	2.325	1	1	0.02007	0.958	0.39234	1.58268	284.801	450.75	dual specificity phosphatase 5
204864_s_at	2.313	1	1	0.02075	0.509	0.63759	1.51353	25.8802	39.1706	interleukin 6 signal transducer (gp130, oncostatin M receptor)
214336_s_at	2.304	1	1	0.02123	1.152	0.3135	1.90251	190.589	362.598	coatomer protein complex, subunit alpha
204284_at	2.266	1	1	0.02343	1.878	0.13354	1.94114	201.487	391.113	protein phosphatase 1, regulatory (inhibitor) subunit 3C
205476_at	2.263	1	1	0.02364	0.963	0.39008	1.34752	4701.41	6335.23	chemokine (C-C motif) ligand 20
218804_at	2.252	1	1	0.02432	0.36	0.73705	1.48418	19.4798	28.9115	transmembrane protein 16A
233827_s_at	2.246	1	1	0.02473	0.663	0.54332	1.3597	223.277	303.59	suppressor of Ty 16 homolog (S. cerevisiae)
235287_at	2.233	1	1	0.02553	1.506	0.20659	1.54184	190.333	293.464	cyclin-dependent kinase 6
201169_s_at	2.222	1	1	0.02625	1.745	0.15596	1.57875	757.741	1196.28	basic helix-loop-helix domain containing, class B, 2
1568876_a_at	2.21	1	1	0.02708	0.4	0.70977	1.29975	13.7476	17.8685	Homo sapiens, Similar to hypothetical protein FLJ21394, clone IMAGE:4820924, mRNA
1567107_s_at	2.209	1	1	0.0272	0.285	0.78989	1.14694	1271.99	1458.9	tropomyosin 3 /// tropomyosin 4
205921_s_at	2.18	1	1	0.02927	1.307	0.26137	1.90056	217.443	413.264	solute carrier family 6 (neurotransmitter transporter, taurine), member 6
228964_at	2.168	1	1	0.03013	2.188	0.09386	2.80409	27.5541	77.2641	PR domain containing 1, with ZNF domain
203065_s_at	2.126	1	1	0.03348	-0.163	0.87853	0.91236	1845.45	1683.71	caveolin 1, caveolae protein, 22kDa
204597_x_at	2.114	1	1	0.03452	0.371	0.72973	1.33965	20.8391	27.9171	stanniocalcin 1
1554677_s_at	2.106	1	1	0.03522	1.129	0.32197	1.68827	43.8833	74.0869	chemokine-like factor super family 4
232751_at	2.087	1	1	0.03686	1.023	0.36394	1.78313	29.1037	51.8957	retinoblastoma binding protein 9
212977_at	2.081	1	1	0.03745	1.246	0.2808	1.27203	6842.11	8703.34	chemokine orphan receptor 1
1554249_a_at	2.068	1	1	0.03868	0.843	0.44689	1.24801	649.064	810.035	zinc finger protein 638
217173_s_at	2.042	1	1	0.04112	0.519	0.63136	1.29026	518.171	668.576	low density lipoprotein receptor (familial hypercholesterolemia)
226811_at	2.04	1	1	0.04136	0.02	0.9853	1.00742	1512.57	1523.79	family with sequence similarity 46, member C
205321_at	2.032	1	1	0.04215	0.883	0.42691	1.23036	1298.78	1597.96	eukaryotic translation initiation factor 2, subunit 3 gamma, 52kDa
205157_s_at	2.03	1	1	0.04234	0.213	0.84142	1.06338	18527.7	19701.9	keratin 17
231067_s_at	2.03	1	1	0.04236	0.63	0.56308	1.87841	26.8282	50.3943	---
224797_at	2.029	1	1	0.04248	0.503	0.64156	1.10597	5451.7	6029.39	arrestin domain containing 3
226452_at	2.025	1	1	0.04287	0.274	0.79743	1.19923	194.333	233.051	pyruvate dehydrogenase kinase, isoenzyme 1
205239_at	2.025	1	1	0.04288	-0.133	0.90051	0.91679	751.488	688.958	amphiregulin (schwannoma-derived growth factor)
227473_at	2.02	1	1	0.04334	0.822	0.45744	1.19094	3871.85	4611.15	---
235016_at	1.978	1	1	0.0479	0.54	0.61782	1.20776	1451.18	1752.68	chromosome 10 open reading frame 74
226611_s_at	1.974	1	1	0.04835	0.356	0.73983	1.21449	25.7574	31.2822	proline rich 6
210286_s_at	1.973	1	1	0.04845	1.063	0.3477	1.81544	34.9509	63.4513	solute carrier family 4, sodium bicarbonate cotransporter, member 7
242961_x_at	1.963	1	1	0.04962	0.315	0.76869	1.20498	54.4951	65.6653	DEAD (Asp-Glu-Ala-Asp) box polypeptide 58
1557078_at	1.963	1	1	0.04969	0.256	0.81063	1.09177	948.911	1036	hypothetical protein MGC19764
224583_at	1.962	1	1	0.04972	0.133	0.90048	1.05767	603.225	638.012	coactosin-like 1 (Dictyostelium)

## Sheet: Down AZT 6 vs PBS 6hr
probe.name	z.stat	fdr.BH	fdr.RE	z.pv	t.stat	t.pv	fc2power	mexpcon	mexptrt	gene.name
224565_at	-3.914	1	0.7625	9e-05	-0.691	0.52774	0.70103	2473.01	1733.66	trophoblast-derived noncoding RNA
206693_at	-3.139	1	1	0.00169	-1.444	0.22233	0.58995	872.913	514.979	interleukin 7
223985_at	-2.962	1	1	0.00305	-0.876	0.43048	0.47964	109.616	52.5758	coiled-coil domain containing 10
208498_s_at	-2.951	1	1	0.00317	-0.246	0.81797	0.72045	1207.95	870.269	amylase, alpha 2A; pancreatic
222925_at	-2.945	1	1	0.00323	-0.624	0.56635	0.5459	48.1638	26.2926	doublecortin domain containing 2
205547_s_at	-2.634	1	1	0.00845	-0.253	0.81294	0.61956	30.2269	18.7274	transgelin
227949_at	-2.44	1	1	0.0147	-0.618	0.5699	0.5942	18.6291	11.0694	phosphatase and actin regulator 3
218824_at	-2.426	1	1	0.01527	-0.25	0.81481	0.63718	40.8757	26.0452	hypothetical protein FLJ10781
220724_at	-2.416	1	1	0.01569	-0.7	0.52253	0.64948	341.05	221.506	hypothetical protein FLJ21511
209278_s_at	-2.379	1	1	0.01738	-0.593	0.58527	0.76478	2616.35	2000.94	tissue factor pathway inhibitor 2
213317_at	-2.372	1	1	0.0177	-0.746	0.49735	0.61875	75.1664	46.509	Chloride intracellular channel 5
224566_at	-2.332	1	1	0.01972	-0.627	0.56486	0.68687	701.994	482.176	trophoblast-derived noncoding RNA
222848_at	-2.295	1	1	0.02171	-0.469	0.66378	0.81893	914.133	748.615	leucine zipper protein FKSG14
215729_s_at	-2.288	1	1	0.02215	-1.507	0.20632	0.59749	271.786	162.39	vestigial like 1 (Drosophila)
236473_at	-2.266	1	1	0.02344	-0.474	0.65995	0.78666	1196.99	941.629	KIAA1345 protein
224567_x_at	-2.26	1	1	0.02385	-0.998	0.37483	0.49849	3105.45	1548.02	metastasis associated lung adenocarcinoma transcript 1 (non-coding RNA)
220723_s_at	-2.243	1	1	0.0249	-0.767	0.48564	0.75204	1153.48	867.461	hypothetical protein FLJ21511
244033_at	-2.228	1	1	0.02586	-0.771	0.4838	0.55018	30.0467	16.5312	---
212451_at	-2.213	1	1	0.02686	-1.722	0.16021	0.57782	637.913	368.597	KIAA0256 gene product
214464_at	-2.21	1	1	0.02708	-2.291	0.08372	0.59451	738.661	439.141	CDC42 binding protein kinase alpha (DMPK-like)
221501_x_at	-2.202	1	1	0.02768	-0.481	0.65536	0.84582	1447.47	1224.3	hypothetical protein LOC339047
1552326_a_at	-2.197	1	1	0.02803	-1.761	0.15298	0.7521	2441.86	1836.53	coiled-coil domain containing 11
205890_s_at	-2.18	1	1	0.02924	-0.389	0.71741	0.68262	57.6996	39.387	ubiquitin D
238623_at	-2.169	1	1	0.03009	-1.186	0.3014	0.55243	30.4921	16.8446	Mitogen-activated protein kinase kinase kinase 4
224443_at	-2.161	1	1	0.0307	-1.057	0.35016	0.69292	518.848	359.518	hypothetical protein MGC14801 /// hypothetical protein MGC14801
235722_at	-2.155	1	1	0.03119	-1.68	0.16835	0.60398	381.014	230.124	Synaptojanin 2 binding protein
1555878_at	-2.145	1	1	0.03193	-2.028	0.11241	0.50536	25.5534	12.9136	Ribosomal protein S24
229746_x_at	-2.143	1	1	0.03209	-1.293	0.26555	0.65194	312.035	203.429	CCAAT/enhancer binding protein zeta
227943_at	-2.125	1	1	0.03363	-1.293	0.26558	0.66038	380.011	250.952	---
1557137_at	-2.105	1	1	0.0353	-2.343	0.07914	0.66434	1203.18	799.328	transmembrane protein 17
214870_x_at	-2.096	1	1	0.03608	-0.855	0.44079	0.7858	1510.86	1187.24	nuclear pore complex interacting protein /// hypothetical protein LOC339047 /// similar to hypothetical protein LOC339047
210387_at	-2.08	1	1	0.03754	-0.912	0.41359	0.56305	432.962	243.781	histone 1, H2bg
213051_at	-2.08	1	1	0.03755	-1.362	0.24497	0.72136	776.43	560.086	zinc finger CCCH type, antiviral 1
236674_at	-2.075	1	1	0.038	-0.757	0.49126	0.7278	477.669	347.646	hypothetical LOC388780
202191_s_at	-2.073	1	1	0.03815	-1.787	0.14843	0.61803	301.011	186.034	growth arrest-specific 7
231861_at	-2.072	1	1	0.0383	-1.246	0.28078	0.67687	275.94	186.776	low density lipoprotein receptor-related protein 10
1556007_s_at	-2.07	1	1	0.03842	-1.736	0.15752	0.42365	62.9016	26.648	---
209170_s_at	-2.056	1	1	0.03981	-0.488	0.65139	0.705	26.9123	18.9733	glycoprotein M6B
242874_at	-2.042	1	1	0.04111	-2.585	0.06099	0.50838	13.4234	6.82419	CDNA FLJ37931 fis, clone CTONG2004397
209387_s_at	-2.039	1	1	0.04149	0.066	0.95067	1.02074	5598.15	5714.24	transmembrane 4 superfamily member 1
1553133_at	-2.026	1	1	0.04277	-0.316	0.76812	0.8012	212.938	170.606	chromosome 9 open reading frame 72
208900_s_at	-2.022	1	1	0.04318	-1.979	0.11895	0.6459	1283.91	829.277	topoisomerase (DNA) I
213024_at	-2.021	1	1	0.0433	-1.026	0.36268	0.81248	1844.06	1498.26	TATA element modulatory factor 1
232541_at	-2.002	1	1	0.04527	-1.566	0.1925	0.5614	13.5874	7.62791	Epidermal growth factor receptor (erythroblastic leukemia viral (v-erb-b) oncogene homolog, avian)
1558678_s_at	-1.998	1	1	0.04569	-1.47	0.21549	0.45145	5763.52	2601.95	metastasis associated lung adenocarcinoma transcript 1 (non-coding RNA)
209386_at	-1.979	1	1	0.04779	-0.437	0.68469	0.91231	7488.03	6831.38	transmembrane 4 superfamily member 1
228729_at	-1.979	1	1	0.04787	-0.298	0.78024	0.83753	618.994	518.426	cyclin B1

## Sheet: Up AZT 24hr vs PBS 24hr
probe.name	z.stat	fdr.BH	fdr.RE	z.pv	t.stat	t.pv	fc2power	mexpcon	mexptrt	gene.name
201275_at	4.599	0.00465	0.00563	0	7.202	0.00036	1.9115	4403.66	8417.6	farnesyl diphosphate synthase (farnesyl pyrophosphate synthetase, dimethylallyltranstransferase, geranyltranstransferase)
204615_x_at	4.599	0.00465	0.00563	0	5.731	0.00123	1.93802	5118.6	9919.93	isopentenyl-diphosphate delta isomerase
213787_s_at	4.756	0.00257	0.00435	0	5.515	0.00149	1.9531	2104.8	4110.88	emopamil binding protein (sterol isomerase)
202068_s_at	4.867	0.00188	0.00435	0	3.88	0.00817	2.10259	2388.37	5021.76	low density lipoprotein receptor (familial hypercholesterolemia)
202218_s_at	4.744	0.00266	0.00435	0	3.848	0.00848	2.48841	545.182	1356.64	fatty acid desaturase 2
201626_at	6.576	0	0	0	5.754	0.0012	2.55462	3206.77	8192.06	insulin induced gene 1
202245_at	5.862	2e-05	0	0	6.266	0.00077	2.60757	867.817	2262.89	lanosterol synthase (2,3-oxidosqualene-lanosterol cyclase)
201790_s_at	5.113	0.0006	0	0	6.4	0.00069	2.62825	728.393	1914.4	7-dehydrocholesterol reductase
207275_s_at	5.223	0.0004	0	0	5.663	0.0013	2.65142	1059.92	2810.3	acyl-CoA synthetase long-chain family member 1
212218_s_at	6.047	1e-05	0	0	3.746	0.00956	2.66695	1854.66	4946.27	fatty acid synthase
201791_s_at	4.933	0.00138	0.00435	0	7.415	0.00031	2.91982	425.765	1243.16	7-dehydrocholesterol reductase
230493_at	4.787	0.00238	0.00435	0	4.862	0.00282	2.96691	276.896	821.527	WGAR9166
223839_s_at	5.511	0.0001	0	0	5.617	0.00136	2.99294	876.048	2621.96	---
200832_s_at	11.39	0	0	0	11.072	3e-05	3.28896	8796.13	28930.1	stearoyl-CoA desaturase (delta-9-desaturase)
226390_at	4.806	0.00232	0.00435	0	4.061	0.00664	3.30471	229.711	759.13	START domain containing 4, sterol regulated
217173_s_at	4.851	0.00197	0.00435	0	1.625	0.15536	3.33822	173.706	579.869	low density lipoprotein receptor (familial hypercholesterolemia)
201627_s_at	7.975	0	0	0	4.511	0.00405	3.34058	1968.38	6575.55	insulin induced gene 1
202308_at	6.102	0	0	0	10.482	4e-05	3.44898	614.248	2118.53	sterol regulatory element binding transcription factor 1
208962_s_at	5.689	4e-05	0	0	3.065	0.02208	3.50434	468.457	1641.63	fatty acid desaturase 1
201625_s_at	6.051	1e-05	0	0	5.709	0.00125	3.59616	453.592	1631.19	insulin induced gene 1
200831_s_at	8.501	0	0	0	10.933	3e-05	3.68478	1523.72	5614.57	stearoyl-CoA desaturase (delta-9-desaturase)
229797_at	4.802	0.00232	0.00435	0	2.439	0.05055	4.63991	15.3672	71.3025	mucolipin 3
201141_at	15.446	0	0	0	5.35	0.00174	7.38736	1711.84	12646	glycoprotein (transmembrane) nmb
211708_s_at	9.436	0	0	0	3.348	0.01545	8.3959	244.423	2052.15	stearoyl-CoA desaturase (delta-9-desaturase) /// stearoyl-CoA desaturase (delta-9-desaturase)
209395_at	6.432	0	0	0	2.51	0.04593	8.47766	15.6572	132.737	chitinase 3-like 1 (cartilage glycoprotein-39)
211162_x_at	9.169	0	0	0	3.472	0.01327	8.78224	205.161	1801.77	stearoyl-CoA desaturase (delta-9-desaturase)
213796_at	8.209	0	0	0	2.411	0.05249	9.0077	27.1587	244.638	small proline-rich protein 1A
1554018_at	13.298	0	0	0	4.381	0.00467	28.7661	64.6304	1859.16	glycoprotein (transmembrane) nmb
201471_s_at	4.493	0.0063	0.00563	1e-05	5.071	0.00229	1.73861	6320.81	10989.4	sequestosome 1
208881_x_at	4.483	0.00638	0.00563	1e-05	6.559	0.0006	1.98411	4874.15	9670.87	isopentenyl-diphosphate delta isomerase
201963_at	4.515	0.00598	0.00563	1e-05	4.206	0.00565	1.99202	4030.7	8029.23	acyl-CoA synthetase long-chain family member 1
202067_s_at	4.479	0.0064	0.00563	1e-05	2.07	0.08392	2.57267	419.023	1078.01	low density lipoprotein receptor (familial hypercholesterolemia)
211019_s_at	4.56	0.00528	0.00563	1e-05	4.069	0.00658	3.907	106.853	417.474	lanosterol synthase (2,3-oxidosqualene-lanosterol cyclase)
218918_at	4.257	0.01615	0.00563	2e-05	1.907	0.1051	1.97219	610.572	1204.16	mannosidase, alpha, class 1C, member 1
209949_at	4.268	0.01565	0.00563	2e-05	2.321	0.05938	2.36158	608.433	1436.86	neutrophil cytosolic factor 2 (65kDa, chronic granulomatous disease, autosomal 2)
208963_x_at	4.284	0.01478	0.00563	2e-05	3.815	0.00881	2.70095	435.514	1176.3	fatty acid desaturase 1
221750_at	4.097	0.03176	0.00833	4e-05	2.82	0.03036	1.83794	1330.5	2445.38	3-hydroxy-3-methylglutaryl-Coenzyme A synthase 1 (soluble)
225922_at	4.009	0.04273	0.01282	6e-05	6.336	0.00072	2.51766	339.991	855.983	KIAA1450 protein
206584_at	4.013	0.04257	0.01282	6e-05	2.817	0.03047	4.20116	15.3274	64.3927	lymphocyte antigen 96
221577_x_at	3.98	0.04702	0.01379	7e-05	2.569	0.0424	1.75588	4376.61	7684.79	growth differentiation factor 15
202735_at	3.893	0.06142	0.01416	0.0001	4.174	0.00585	1.8489	1568.72	2900.42	emopamil binding protein (sterol isomerase)
212186_at	3.864	0.06637	0.01416	0.00011	4.106	0.00632	1.86092	1492.13	2776.72	acetyl-Coenzyme A carboxylase alpha
234312_s_at	3.861	0.06637	0.01416	0.00011	6.9	0.00046	2.0848	739.79	1542.32	acetyl-Coenzyme A synthetase 2 (ADP forming)
218484_at	3.874	0.06501	0.01416	0.00011	0.918	0.39391	2.23709	203.347	454.906	NADH:ubiquinone oxidoreductase MLRQ subunit homolog
202679_at	3.877	0.06499	0.01416	0.00011	6.664	0.00055	2.34009	470.359	1100.68	Niemann-Pick disease, type C1
212324_s_at	3.851	0.06843	0.01416	0.00012	1.389	0.21413	1.57771	1814.81	2863.25	vacuolar protein sorting 13D (yeast)
241031_at	3.838	0.07052	0.01416	0.00012	7.064	0.0004	3.65453	31.4103	114.79	Nuclear localized factor 1
232230_at	3.776	0.08472	0.01416	0.00016	5.347	0.00175	2.85773	165.058	471.692	Chromosome 10 open reading frame 75
213112_s_at	3.779	0.08444	0.01416	0.00016	2.096	0.08087	3.41613	29.7183	101.522	sequestosome 1
204734_at	3.742	0.09433	0.01416	0.00018	1.05	0.33436	1.44156	14331.3	20659.3	keratin 15
209146_at	3.735	0.09596	0.01416	0.00019	2.63	0.03904	1.56298	10192.6	15930.9	sterol-C4-methyl oxidase-like
209608_s_at	3.723	0.09707	0.01416	0.0002	4.457	0.0043	1.88592	1262.35	2380.7	acetyl-Coenzyme A acetyltransferase 2 (acetoacetyl Coenzyme A thiolase)
202912_at	3.71	0.10038	0.01416	0.00021	1.967	0.09676	1.71216	1958.7	3353.62	adrenomedullin
212276_at	3.71	0.10038	0.01416	0.00021	3.022	0.02333	3.4485	133.961	461.965	lipin 1
221698_s_at	3.654	0.12159	0.01575	0.00026	1.013	0.35003	2.06146	221.197	455.99	C-type lectin domain family 7, member A /// C-type lectin domain family 7, member A
1555756_a_at	3.621	0.13497	0.01575	0.00029	1.622	0.15595	3.44756	71.7571	247.387	C-type lectin domain family 7, member A
218088_s_at	3.606	0.1418	0.01575	0.00031	3.182	0.01902	2.11619	478.829	1013.29	Ras-related GTP binding C
1554485_s_at	3.602	0.14252	0.01575	0.00032	2.339	0.05793	2.23821	262.114	586.667	---
205920_at	3.535	0.17397	0.01875	0.00041	1.193	0.27803	1.53727	873.584	1342.94	solute carrier family 6 (neurotransmitter transporter, taurine), member 6
216607_s_at	3.521	0.18188	0.01985	0.00043	2.59	0.04122	1.74736	2986.51	5218.51	cytochrome P450, family 51, subfamily A, polypeptide 1
228098_s_at	3.425	0.2463	0.0219	0.00061	2.951	0.02556	1.62563	1757.03	2856.27	myosin regulatory light chain interacting protein
208926_at	3.424	0.2463	0.0219	0.00062	5.938	0.00102	1.97157	1047.39	2065	sialidase 1 (lysosomal sialidase)
208964_s_at	3.389	0.2737	0.02394	0.0007	3.304	0.01632	2.38057	369.39	879.358	fatty acid desaturase 1
209389_x_at	3.382	0.27889	0.02394	0.00072	3.616	0.01115	1.53253	8253.4	12648.6	diazepam binding inhibitor (GABA receptor modulator, acyl-Coenzyme A binding protein)
209681_at	3.358	0.29799	0.02449	0.00078	5.922	0.00103	2.0439	435.03	889.158	solute carrier family 19 (thiamine transporter), member 2
209875_s_at	3.359	0.29799	0.02449	0.00078	1.587	0.16372	3.96192	10.2063	40.4367	secreted phosphoprotein 1 (osteopontin, bone sialoprotein I, early T-lymphocyte activation 1)
203504_s_at	3.356	0.29842	0.02449	0.00079	2.514	0.04566	2.71742	51.5053	139.961	ATP-binding cassette, sub-family A (ABC1), member 1
225401_at	3.328	0.32105	0.02468	0.00087	2.808	0.03084	1.73084	473.387	819.358	kidney predominant protein NCU-G1
210950_s_at	3.306	0.33938	0.02468	0.00095	4.319	0.00499	1.56433	8192.72	12816.1	farnesyl-diphosphate farnesyltransferase 1
223376_s_at	3.305	0.33938	0.02468	0.00095	6.801	0.00049	1.6564	3347.81	5545.3	brain protein I3
205921_s_at	3.286	0.35784	0.02581	0.00101	0.783	0.46355	1.57517	364.598	574.304	solute carrier family 6 (neurotransmitter transporter, taurine), member 6
212326_at	3.279	0.36123	0.02609	0.00104	1.531	0.17653	1.67467	1153.94	1932.47	vacuolar protein sorting 13D (yeast)
207655_s_at	3.279	0.36123	0.02609	0.00104	1.957	0.09806	1.90992	474.637	906.52	B-cell linker
225018_at	3.27	0.36948	0.02609	0.00107	8.643	0.00013	2.12636	308.736	656.483	spire homolog 1 (Drosophila)
202382_s_at	3.23	0.4101	0.02909	0.00124	2.939	0.02598	1.76503	1305.27	2303.83	glucosamine-6-phosphate deaminase 1
222514_at	3.21	0.43757	0.0314	0.00133	6.722	0.00053	2.20771	281.851	622.247	Ras-related GTP binding C
202022_at	3.174	0.47707	0.0314	0.0015	2.933	0.02617	2.26997	453.351	1029.1	aldolase C, fructose-bisphosphate
204567_s_at	3.174	0.47707	0.0314	0.0015	2.368	0.05565	2.76577	253.453	700.992	ATP-binding cassette, sub-family G (WHITE), member 1
218251_at	3.096	0.60567	0.04181	0.00196	3.763	0.00937	1.65814	1234.91	2047.66	MID1 interacting protein 1 (gastrulation specific G12-like (zebrafish))
216985_s_at	3.068	0.6612	0.04372	0.00215	2.395	0.05369	3.04949	42.0944	128.366	syntaxin 3A
224995_at	3.06	0.67173	0.04372	0.00221	4.289	0.00516	2.0211	634.471	1282.33	spire homolog 1 (Drosophila)
207675_x_at	3.036	0.70777	0.04467	0.0024	1.409	0.20845	2.1781	35.5284	77.3846	artemin
208647_at	3.021	0.73634	0.04467	0.00252	4.692	0.00335	1.4001	11669.5	16338.5	farnesyl-diphosphate farnesyltransferase 1
225924_at	3.019	0.73645	0.04467	0.00253	3.963	0.00742	2.26388	127.656	288.999	KIAA1450 protein
216243_s_at	2.988	0.80014	0.04467	0.00281	3.254	0.01738	1.62186	1783.51	2892.6	interleukin 1 receptor antagonist
212657_s_at	2.969	0.83358	0.04467	0.00299	2.16	0.0741	1.5942	3524.82	5619.29	interleukin 1 receptor antagonist
220319_s_at	2.961	0.84699	0.04646	0.00307	4.395	0.00459	1.7502	719.713	1259.64	myosin regulatory light chain interacting protein
225826_at	2.958	0.84971	0.048	0.0031	4.298	0.0051	1.70601	780.342	1331.27	methylmalonic aciduria (cobalamin deficiency) type B
208763_s_at	2.957	0.84971	0.048	0.00311	1.825	0.11787	1.67688	901.177	1511.16	delta sleep inducing peptide, immunoreactor
228640_at	2.949	0.86635	0.04876	0.00318	1.875	0.10996	1.85947	381.226	708.877	BH-protocadherin (brain-heart)
204070_at	2.908	0.98097	0.05517	0.00364	1.866	0.11124	1.29289	12249.7	15837.6	retinoic acid receptor responder (tazarotene induced) 3
234989_at	2.901	0.99804	0.05784	0.00372	0.847	0.42968	2.00111	285.071	570.46	trophoblast-derived noncoding RNA
217889_s_at	2.879	1	0.0599	0.00398	1.363	0.22172	2.72525	25.9153	70.6257	cytochrome b reductase 1
209238_at	2.844	1	0.06355	0.00446	5.041	0.00235	1.80146	385.95	695.275	syntaxin 3A
225809_at	2.835	1	0.06355	0.00458	5.738	0.00122	1.67828	513.752	862.22	DKFZP564O0823 protein
201537_s_at	2.817	1	0.06455	0.00485	2.162	0.07391	1.8519	156.027	288.947	dual specificity phosphatase 3 (vaccinia virus phosphatase VH1-related)
211070_x_at	2.802	1	0.06455	0.00508	3.054	0.02241	1.43753	11902	17109.6	diazepam binding inhibitor (GABA receptor modulator, acyl-Coenzyme A binding protein) /// diazepam binding inhibitor (GABA receptor modulator, acyl-Coenzyme A binding protein)
202540_s_at	2.776	1	0.06878	0.00551	3.538	0.01225	1.56172	1956.4	3055.34	3-hydroxy-3-methylglutaryl-Coenzyme A reductase
220122_at	2.762	1	0.06937	0.00575	1.986	0.09427	2.1555	67.1305	144.7	multiple C2-domains with two transmembrane regions 1
226884_at	2.759	1	0.06964	0.00579	1.972	0.09604	1.60281	2739.96	4391.62	leucine rich repeat neuronal 1
204466_s_at	2.737	1	0.07105	0.0062	2.016	0.09045	1.98788	228.639	454.508	synuclein, alpha (non A4 component of amyloid precursor) /// synuclein, alpha (non A4 component of amyloid precursor)
209498_at	2.714	1	0.0735	0.00665	1.934	0.10129	2.46965	103.758	256.247	carcinoembryonic antigen-related cell adhesion molecule 1 (biliary glycoprotein)
1558693_s_at	2.712	1	0.0735	0.00668	2.803	0.03103	1.83077	299.899	549.048	kidney predominant protein NCU-G1
200743_s_at	2.712	1	0.0735	0.0067	4.441	0.00437	1.71993	1067.08	1835.3	tripeptidyl peptidase I
230043_at	2.698	1	0.07595	0.00697	1.249	0.25803	1.43365	997.778	1430.47	Transcribed locus
211423_s_at	2.698	1	0.07595	0.00698	4.535	0.00395	1.5001	2138.26	3207.61	sterol-C5-desaturase (ERG3 delta-5-desaturase homolog, fungal)-like
243862_at	2.662	1	0.08093	0.00778	0.779	0.46547	1.67092	121.227	202.561	zinc finger, CW type with PWWP domain 2
230492_s_at	2.66	1	0.08093	0.00782	1.403	0.21008	1.48254	454.632	674.008	hypothetical protein KIAA1434
214203_s_at	2.655	1	0.08093	0.00792	2.742	0.03366	2.28209	143.387	327.223	proline dehydrogenase (oxidase) 1
202314_at	2.637	1	0.08093	0.00838	3.223	0.01807	1.49417	4976.63	7435.93	cytochrome P450, family 51, subfamily A, polypeptide 1
203400_s_at	2.635	1	0.08093	0.00842	1.195	0.27725	1.63276	1194.14	1949.74	transferrin
202539_s_at	2.632	1	0.08093	0.0085	4.25	0.00538	1.57763	2620.54	4134.26	3-hydroxy-3-methylglutaryl-Coenzyme A reductase
209230_s_at	2.631	1	0.08093	0.00851	2.293	0.06168	1.59137	4000.38	6366.09	p8 protein (candidate of metastasis 1)
212323_s_at	2.625	1	0.08093	0.00867	1.371	0.21942	1.40241	909.902	1276.06	vacuolar protein sorting 13D (yeast)
203027_s_at	2.62	1	0.08093	0.0088	3.664	0.01053	2.51997	27.8402	70.1565	mevalonate (diphospho) decarboxylase
218990_s_at	2.618	1	0.08093	0.00885	1.658	0.14834	1.42753	797.762	1138.83	small proline-rich protein 3
208788_at	2.608	1	0.08093	0.0091	4.169	0.00588	1.30061	13569.9	17649.1	ELOVL family member 5, elongation of long chain fatty acids (FEN1/Elo2, SUR4/Elo3-like, yeast)
236144_at	2.608	1	0.08093	0.00911	2.852	0.02909	2.92724	12.1919	35.6885	carboxypeptidase X (M14 family), member 2
210337_s_at	2.597	1	0.08385	0.00941	1.578	0.16571	1.47617	1262.56	1863.75	ATP citrate lyase
223130_s_at	2.59	1	0.0855	0.00959	3.121	0.02057	1.60301	914.283	1465.6	myosin regulatory light chain interacting protein
200742_s_at	2.589	1	0.08593	0.00964	2.19	0.0711	1.66793	517.519	863.187	tripeptidyl peptidase I
212274_at	2.585	1	0.08636	0.00973	3.47	0.0133	2.16471	82.4944	178.576	lipin 1
209348_s_at	2.58	1	0.0883	0.00987	2.649	0.03807	1.86188	491.638	915.371	v-maf musculoaponeurotic fibrosarcoma oncogene homolog (avian)
244780_at	2.569	1	0.08996	0.01021	2.76	0.03286	1.64304	964.981	1585.51	sphingosine-1-phosphate phosphotase 2
201169_s_at	2.568	1	0.08996	0.01023	1.309	0.23837	1.58207	852.509	1348.73	basic helix-loop-helix domain containing, class B, 2
213075_at	2.562	1	0.09077	0.01041	1.662	0.14761	1.51473	857.615	1299.05	olfactomedin-like 2A
207332_s_at	2.555	1	0.09203	0.01063	2.845	0.02938	1.56318	1603.95	2507.26	transferrin receptor (p90, CD71)
212659_s_at	2.53	1	0.0947	0.01139	2.915	0.0268	1.75699	472.067	829.417	interleukin 1 receptor antagonist
213187_x_at	2.518	1	0.09789	0.01182	3.722	0.00983	1.31999	15521.3	20488	ferritin, light polypeptide
214073_at	2.485	1	0.1131	0.01295	1.682	0.14362	2.34438	51.5268	120.799	cortactin
209457_at	2.484	1	0.1134	0.01299	1.281	0.24749	1.65118	309.4	510.876	dual specificity phosphatase 5
202428_x_at	2.468	1	0.11785	0.01358	3.401	0.01447	1.31817	12418.3	16369.4	diazepam binding inhibitor (GABA receptor modulator, acyl-Coenzyme A binding protein)
215649_s_at	2.466	1	0.11785	0.01366	3.933	0.00769	1.71999	648.18	1114.87	mevalonate kinase (mevalonic aciduria)
200701_at	2.456	1	0.118	0.01404	3.476	0.0132	1.40612	8605.39	12100.2	Niemann-Pick disease, type C2
225328_at	2.453	1	0.118	0.01417	1.744	0.13182	1.84455	432.306	797.409	F-box protein 32
218820_at	2.446	1	0.11815	0.01446	1.205	0.27364	1.69619	38.1157	64.6516	chromosome 14 open reading frame 132
201538_s_at	2.434	1	0.12131	0.01495	2.516	0.04551	2.04149	72.6313	148.276	dual specificity phosphatase 3 (vaccinia virus phosphatase VH1-related)
218631_at	2.431	1	0.12157	0.01506	1.923	0.10278	1.53391	961.523	1474.89	arginine vasopressin-induced 1
226960_at	2.428	1	0.12443	0.01518	5.283	0.00186	1.30179	15768.9	20527.9	DMC
217775_s_at	2.418	1	0.1271	0.01561	3.563	0.01188	1.43133	1330.54	1904.44	retinol dehydrogenase 11 (all-trans and 9-cis)
223129_x_at	2.417	1	0.1271	0.01566	4.303	0.00507	1.60511	680.946	1092.99	myosin regulatory light chain interacting protein
1554807_a_at	2.416	1	0.1271	0.01569	4.296	0.00511	1.90914	161.876	309.044	spire homolog 1 (Drosophila)
202007_at	2.414	1	0.12733	0.01579	1.143	0.29675	1.58538	93.2555	147.845	nidogen (enactin)
210868_s_at	2.395	1	0.13544	0.01664	1.85	0.11372	2.06214	63.4288	130.799	ELOVL family member 6, elongation of long chain fatty acids (FEN1/Elo2, SUR4/Elo3-like, yeast)
221985_at	2.393	1	0.13544	0.01671	4.762	0.00312	1.70326	333.566	568.148	DRE1 protein
214318_s_at	2.382	1	0.1373	0.0172	1.521	0.17917	1.98379	27.3513	54.2593	hypothetical protein CG003
209345_s_at	2.378	1	0.1373	0.0174	3.612	0.01121	1.8117	542.387	982.641	phosphatidylinositol 4-kinase type II
232593_at	2.368	1	0.13827	0.01786	1.804	0.12121	1.92883	139.599	269.263	hypothetical protein BC012317
229327_s_at	2.368	1	0.13827	0.01787	1.424	0.20441	1.72639	18.0688	31.1937	---
212992_at	2.368	1	0.13827	0.0179	4.996	0.00246	1.4865	3275.85	4869.57	chromosome 14 open reading frame 78
218434_s_at	2.367	1	0.13827	0.01793	3.042	0.02275	1.46969	2658.73	3907.51	acetoacetyl-CoA synthetase
213375_s_at	2.365	1	0.14031	0.01802	4.905	0.0027	2.78303	14.3959	40.0644	hypothetical gene CG018
201118_at	2.355	1	0.14347	0.01853	2.092	0.08138	1.26422	6130.84	7750.71	phosphogluconate dehydrogenase /// phosphogluconate dehydrogenase
201170_s_at	2.345	1	0.14518	0.01904	1.663	0.1474	1.38775	8158.15	11321.5	basic helix-loop-helix domain containing, class B, 2
226460_at	2.342	1	0.14518	0.0192	3.496	0.01289	2.01762	159.48	321.771	KIAA1450 protein
225803_at	2.339	1	0.14595	0.01931	1.378	0.21734	1.5104	945.818	1428.57	F-box protein 32
204235_s_at	2.338	1	0.14671	0.01937	1.905	0.10544	1.78177	991.856	1767.26	GULP, engulfment adaptor PTB domain containing 1
214180_at	2.336	1	0.14687	0.01951	1.869	0.11079	2.00952	144.978	291.336	Mannosidase, alpha, class 1C, member 1
209921_at	2.33	1	0.14926	0.0198	0.721	0.49775	1.59864	71.4223	114.178	solute carrier family 7, (cationic amino acid transporter, y+ system) member 11
224325_at	2.324	1	0.14926	0.02011	1.146	0.2956	1.72887	47.2576	81.7024	frizzled homolog 8 (Drosophila) /// frizzled homolog 8 (Drosophila)
225272_at	2.312	1	0.1516	0.02079	5.112	0.00219	1.58205	1483.95	2347.68	spermidine/spermine N1-acetyltransferase 2
221524_s_at	2.311	1	0.1516	0.02085	2.982	0.02459	1.44422	1833.03	2647.3	Ras-related GTP binding D
227190_at	2.311	1	0.1516	0.02085	1.881	0.10894	1.60214	440.563	705.845	---
225801_at	2.31	1	0.1516	0.02087	1.804	0.1213	1.93868	12.9027	25.0143	F-box protein 32
200748_s_at	2.297	1	0.15331	0.02164	3.378	0.01489	1.22939	24914.4	30629.5	ferritin, heavy polypeptide 1
203641_s_at	2.288	1	0.15517	0.02214	1.492	0.18626	1.72492	14.2962	24.6598	COBL-like 1
218638_s_at	2.286	1	0.15587	0.02224	1.019	0.34747	1.34881	5025.56	6778.51	spondin 2, extracellular matrix protein
221864_at	2.284	1	0.15897	0.02238	2.769	0.03246	1.39237	1192.52	1660.43	hypothetical protein MGC13024
233565_s_at	2.277	1	0.15977	0.02276	4.008	0.00706	1.8134	415.765	753.947	syndecan binding protein (syntenin) 2
200661_at	2.269	1	0.16384	0.02327	3.932	0.00769	1.45371	1653.51	2403.72	protective protein for beta-galactosidase (galactosialidosis)
215223_s_at	2.266	1	0.16563	0.02343	2.316	0.05981	1.53273	592.434	908.043	superoxide dismutase 2, mitochondrial
210788_s_at	2.264	1	0.16685	0.02359	4.108	0.0063	1.35787	2642.64	3588.37	dehydrogenase/reductase (SDR family) member 7
218559_s_at	2.262	1	0.16713	0.02367	1.331	0.23154	1.55121	1090.94	1692.28	v-maf musculoaponeurotic fibrosarcoma oncogene homolog B (avian)
216028_at	2.262	1	0.16713	0.02368	0.602	0.56899	1.45041	447.905	649.645	DKFZP564C152 protein
221728_x_at	2.253	1	0.17008	0.02428	0.346	0.74102	1.41885	39.9449	56.6758	---
1558697_a_at	2.243	1	0.17135	0.02489	0.88	0.4129	1.79212	7.86412	14.0934	limkain b1
213164_at	2.242	1	0.17143	0.02494	2.35	0.05707	1.68425	406.674	684.94	solute carrier family 5 (inositol transporters), member 3
242088_at	2.233	1	0.17753	0.02554	1.11	0.30954	1.54827	75.3599	116.677	DRE1 protein
218700_s_at	2.229	1	0.17984	0.02583	2.802	0.0311	1.63024	493.92	805.209	RAB7, member RAS oncogene family-like 1
210029_at	2.215	1	0.18329	0.02677	0.731	0.49255	1.47106	24.4833	36.0164	indoleamine-pyrrole 2,3 dioxygenase
214919_s_at	2.213	1	0.18387	0.02688	5.884	0.00107	1.46596	1507.86	2210.45	eukaryotic translation initiation factor 4E binding protein 3 /// MASK-4E-BP3 alternate reading frame gene
205534_at	2.208	1	0.18717	0.02724	2.04	0.08748	1.91092	170.023	324.9	BH-protocadherin (brain-heart)
202284_s_at	2.205	1	0.18773	0.02747	2.11	0.07941	1.27712	6796.64	8680.11	cyclin-dependent kinase inhibitor 1A (p21, Cip1)
212929_s_at	2.204	1	0.1878	0.02756	2.113	0.07909	1.44759	819.629	1186.49	FLJ10824 protein /// similar to KIAA0592 protein
224606_at	2.196	1	0.18942	0.0281	1.355	0.22427	1.26139	1240.97	1565.35	Homo sapiens, clone IMAGE:4096273, mRNA
201667_at	2.186	1	0.19578	0.02882	1	0.35578	1.25183	9056.94	11337.7	gap junction protein, alpha 1, 43kDa (connexin 43)
212120_at	2.185	1	0.1958	0.0289	2.752	0.03319	1.35559	2214.54	3002.01	ras homolog gene family, member Q /// similar to ARHQ protein /// similar to ARHQ protein
201127_s_at	2.184	1	0.19634	0.02899	2.908	0.02704	1.47659	1560.37	2304.03	ATP citrate lyase
226682_at	2.18	1	0.19791	0.02928	1.875	0.10994	1.77301	210.815	373.778	hypothetical protein LOC283666
206576_s_at	2.179	1	0.19792	0.02932	2.176	0.07246	2.0076	49.1534	98.6805	carcinoembryonic antigen-related cell adhesion molecule 1 (biliary glycoprotein)
226959_at	2.175	1	0.19948	0.02962	3.398	0.01454	1.4077	787.463	1108.52	---
205467_at	2.173	1	0.20052	0.02976	1.971	0.09615	2.60311	54.6289	142.205	caspase 10, apoptosis-related cysteine protease
226824_at	2.158	1	0.20974	0.03094	1.247	0.25892	1.35902	352.573	479.152	carboxypeptidase X (M14 family), member 2
242420_at	2.149	1	0.21327	0.03164	1.414	0.20705	1.81099	14.8746	26.9379	CDNA clone IMAGE:4815736, partial cds
214196_s_at	2.146	1	0.21374	0.03184	1.152	0.29303	1.47861	286.995	424.353	tripeptidyl peptidase I
206291_at	2.139	1	0.21814	0.03247	0.427	0.68445	1.70131	38.6742	65.7967	neurotensin
209782_s_at	2.132	1	0.2204	0.03303	1.252	0.25713	1.49581	364.586	545.352	D site of albumin promoter (albumin D-box) binding protein
204638_at	2.13	1	0.2204	0.03314	1.497	0.18502	1.90331	10.285	19.5755	acid phosphatase 5, tartrate resistant
221523_s_at	2.13	1	0.2204	0.03317	3.387	0.01472	1.47326	1767.48	2603.96	Ras-related GTP binding D
213562_s_at	2.122	1	0.22475	0.03387	1.95	0.09911	1.62278	763.623	1239.19	squalene epoxidase
227246_at	2.115	1	0.22568	0.03439	5.49	0.00153	1.44267	858.515	1238.55	Pleiotropic regulator 1 (PRL1homolog, Arabidopsis)
219195_at	2.107	1	0.22998	0.03514	2.147	0.07545	1.67704	480.042	805.049	peroxisome proliferative activated receptor, gamma, coactivator 1, alpha
200871_s_at	2.105	1	0.22998	0.03529	2.64	0.03854	1.22879	14066.8	17285.2	prosaposin (variant Gaucher disease and variant metachromatic leukodystrophy)
206491_s_at	2.104	1	0.23088	0.03541	5.619	0.00136	1.44015	1142.31	1645.1	N-ethylmaleimide-sensitive factor attachment protein, alpha
211548_s_at	2.102	1	0.23178	0.03553	0.752	0.48071	1.64972	182.563	301.178	hydroxyprostaglandin dehydrogenase 15-(NAD)
225275_at	2.091	1	0.24048	0.03653	0.619	0.55853	1.63421	193.996	317.029	EGF-like repeats and discoidin I-like domains 3
204072_s_at	2.087	1	0.24048	0.03688	1.327	0.23283	1.84449	89.5698	165.21	hypothetical protein CG003
203466_at	2.087	1	0.24048	0.0369	5.314	0.0018	1.52979	420.787	643.714	MpV17 transgene, murine homolog, glomerulosclerosis
201128_s_at	2.081	1	0.24375	0.0374	2.603	0.04051	1.29264	5455.05	7051.44	ATP citrate lyase
235740_at	2.071	1	0.24726	0.03831	2.142	0.07591	1.81259	11.6074	21.0396	Multiple C2-domains with two transmembrane regions 1
201313_at	2.07	1	0.24726	0.03844	1.461	0.19438	1.86387	173.224	322.866	enolase 2 (gamma, neuronal)
204050_s_at	2.064	1	0.25083	0.03897	4.364	0.00475	1.28246	10271.9	13173.3	clathrin, light polypeptide (Lca)
222442_s_at	2.056	1	0.25755	0.03975	5.191	0.00203	1.34659	2224.22	2995.13	ADP-ribosylation factor-like 10C
224090_s_at	2.055	1	0.25755	0.03991	0.885	0.40997	1.67698	26.7391	44.8408	tumor necrosis factor receptor superfamily, member 19
204674_at	2.041	1	0.26667	0.04123	2.819	0.0304	1.65558	242.957	402.235	lymphoid-restricted membrane protein
201884_at	2.031	1	0.27146	0.04227	1.114	0.30806	1.35521	5006.58	6784.94	carcinoembryonic antigen-related cell adhesion molecule 5
205259_at	2.03	1	0.27159	0.04235	0.919	0.39357	1.21625	1451.67	1765.59	nuclear receptor subfamily 3, group C, member 2
1555167_s_at	2.023	1	0.27443	0.04306	2.587	0.04138	1.50669	562.627	847.704	pre-B-cell colony enhancing factor 1
213073_at	2.017	1	0.27443	0.04366	4.328	0.00494	1.87741	60.5399	113.658	zinc finger, FYVE domain containing 26
225457_s_at	2.017	1	0.27443	0.04369	2.729	0.03425	1.42355	1387.05	1974.54	DKFZP564I1171 protein
210286_s_at	2.017	1	0.27443	0.04371	0.099	0.92462	1.076	69.505	74.7874	solute carrier family 4, sodium bicarbonate cotransporter, member 7
213246_at	2.003	1	0.28617	0.04519	3.17	0.01933	1.44275	1148.59	1657.13	chromosome 14 open reading frame 109
200632_s_at	2	1	0.287	0.04554	0.971	0.36921	1.23617	6081.08	7517.25	N-myc downstream regulated gene 1
218532_s_at	1.998	1	0.287	0.04574	4.625	0.0036	1.38711	736.568	1021.7	hypothetical protein FLJ20152
209279_s_at	1.997	1	0.287	0.04584	4.694	0.00335	1.4817	580.041	859.444	NAD(P) dependent steroid dehydrogenase-like
35974_at	1.997	1	0.287	0.04587	2.9	0.02734	1.81886	150.494	273.727	lymphoid-restricted membrane protein
212788_x_at	1.993	1	0.28717	0.04625	3.022	0.02334	1.26153	17527.1	22111	ferritin, light polypeptide
1554406_a_at	1.992	1	0.28717	0.04634	1.346	0.22706	1.70795	79.336	135.502	C-type lectin domain family 7, member A
232541_at	1.99	1	0.28717	0.04654	0.185	0.85907	1.11569	12.6469	14.11	Epidermal growth factor receptor (erythroblastic leukemia viral (v-erb-b) oncogene homolog, avian)
209732_at	1.987	1	0.28717	0.04695	1.308	0.23863	1.77732	587.915	1044.91	C-type lectin domain family 2, member B
201536_at	1.986	1	0.28717	0.04698	5.553	0.00144	1.48851	894.421	1331.36	dual specificity phosphatase 3 (vaccinia virus phosphatase VH1-related)
222209_s_at	1.983	1	0.29007	0.04732	3.481	0.01313	1.38578	1763.35	2443.61	hypothetical protein FLJ22104
227051_at	1.98	1	0.29295	0.04767	1.277	0.24868	1.40885	489.352	689.426	Homo sapiens, clone IMAGE:4393354, mRNA
221477_s_at	1.98	1	0.29319	0.04771	2.306	0.06058	1.58099	515.585	815.134	FLJ43505 protein
215064_at	1.968	1	0.29978	0.04902	2.216	0.06859	2.09443	9.83797	20.605	Sterol-C5-desaturase (ERG3 delta-5-desaturase homolog, fungal)-like
36907_at	1.966	1	0.30064	0.04932	2.626	0.03927	1.94546	81.8603	159.256	mevalonate kinase (mevalonic aciduria)
204056_s_at	1.964	1	0.30064	0.04956	3.557	0.01196	1.6779	210.967	353.981	mevalonate kinase (mevalonic aciduria)

## Sheet: Down AZT 24hr vs PBS 24hr
probe.name	z.stat	fdr.BH	fdr.RE	z.pv	t.stat	t.pv	fc2power	mexpcon	mexptrt	gene.name
222958_s_at	-4.819	0.00225	0.00435	0	-4.487	0.00416	0.16772	144.289	24.2004	DEP domain containing 1
209714_s_at	-5.279	0.00034	0	0	-4.534	0.00396	0.17423	88.7138	15.4563	cyclin-dependent kinase inhibitor 3 (CDK2-associated dual specificity phosphatase)
204475_at	-5.262	0.00035	0	0	-2.369	0.05559	0.18483	742.77	137.289	matrix metalloproteinase 1 (interstitial collagenase)
219918_s_at	-4.601	0.00465	0.00563	0	-5.384	0.00169	0.18515	186.346	34.5014	asp (abnormal spindle)-like, microcephaly associated (Drosophila)
213226_at	-5.113	0.0006	0	0	-4.204	0.00566	0.2508	529.477	132.791	cyclin A2
228273_at	-5.256	0.00035	0	0	-4.533	0.00396	0.2849	828.468	236.034	Hypothetical protein FLJ11029
202589_at	-4.703	0.00305	0.00435	0	-7.995	0.0002	0.28756	736.733	211.858	thymidylate synthetase
209773_s_at	-5.133	0.00058	0	0	-3.831	0.00865	0.29749	1078.38	320.804	ribonucleotide reductase M2 polypeptide
201890_at	-4.758	0.00257	0.00435	0	-3.886	0.00811	0.29787	1181.38	351.904	ribonucleotide reductase M2 polypeptide
228729_at	-4.664	0.0036	0.00563	0	-4.278	0.00522	0.30605	965.745	295.57	cyclin B1
201195_s_at	-4.723	0.00282	0.00435	0	-1.938	0.10065	0.31199	734.947	229.297	solute carrier family 7 (cationic amino acid transporter, y+ system), member 5
201291_s_at	-5.581	7e-05	0	0	-4.76	0.00313	0.31329	1745.48	546.846	topoisomerase (DNA) II alpha 170kDa
218039_at	-6.264	0	0	0	-4.548	0.0039	0.32173	1744.8	561.36	nucleolar and spindle associated protein 1
202954_at	-5.296	0.00032	0	0	-5.322	0.00179	0.35272	2187.55	771.599	ubiquitin-conjugating enzyme E2C
201292_at	-5.019	0.00092	0	0	-5.367	0.00172	0.35558	1926.08	684.884	topoisomerase (DNA) II alpha 170kDa
225664_at	-5.149	0.00057	0	0	-1.77	0.1271	0.35641	1001.5	356.944	collagen, type XII, alpha 1
205959_at	-4.584	0.00489	0.00563	0	-2.444	0.05022	0.39727	1147.8	455.986	matrix metalloproteinase 13 (collagenase 3) /// matrix metalloproteinase 13 (collagenase 3)
223316_at	-4.767	0.00256	0.00435	0	-0.641	0.54522	0.40854	436.579	178.36	coiled-coil domain containing 3
209351_at	-7.55	0	0	0	-2.842	0.0295	0.41964	9208.69	3864.34	keratin 14 (epidermolysis bullosa simplex, Dowling-Meara, Koebner)
201656_at	-5.132	0.00058	0	0	-5.272	0.00188	0.51072	5268.08	2690.53	integrin, alpha 6
205680_at	-5.064	0.00075	0	0	-2.159	0.07415	0.51122	12095.4	6183.34	matrix metalloproteinase 10 (stromelysin 2)
206336_at	-4.787	0.00238	0.00435	0	-2.014	0.09065	0.51432	3523.77	1812.35	chemokine (C-X-C motif) ligand 6 (granulocyte chemotactic protein 2)
205157_s_at	-4.738	0.00268	0.00435	0	-2.562	0.0428	0.55993	17753.8	9940.94	keratin 17
219493_at	-4.489	0.0063	0.00563	1e-05	-6.212	0.0008	0.18563	54.9481	10.2002	SHC SH2-domain binding protein 1
212021_s_at	-4.495	0.0063	0.00563	1e-05	-3.06	0.02223	0.21923	74.9865	16.4391	antigen identified by monoclonal antibody Ki-67
218009_s_at	-4.394	0.00924	0.00563	1e-05	-5.265	0.00189	0.2625	646.841	169.797	protein regulator of cytokinesis 1
218542_at	-4.51	0.006	0.00563	1e-05	-5.975	0.00099	0.26539	689.1	182.879	chromosome 10 open reading frame 3
207165_at	-4.519	0.00598	0.00563	1e-05	-4.726	0.00324	0.27094	520.655	141.066	hyaluronan-mediated motility receptor (RHAMM)
201123_s_at	-4.561	0.00528	0.00563	1e-05	-0.885	0.41034	0.35817	2535.02	907.978	eukaryotic translation initiation factor 5A
206023_at	-4.384	0.00951	0.00563	1e-05	-2.114	0.07889	0.3981	440.784	175.478	neuromedin U
1556773_at	-4.532	0.00581	0.00563	1e-05	-1.53	0.17697	0.45349	3048.08	1382.28	Parathyroid hormone-like hormone
209278_s_at	-4.553	0.00535	0.00563	1e-05	-1.551	0.17181	0.4673	1590.5	743.233	tissue factor pathway inhibitor 2
239430_at	-4.407	0.00882	0.00563	1e-05	-0.399	0.70386	0.55975	185.105	103.614	insulin growth factor-like family member 1
205476_at	-4.518	0.00598	0.00563	1e-05	-0.424	0.686	0.72764	5581.45	4061.29	chemokine (C-C motif) ligand 20
222077_s_at	-4.171	0.02331	0.00563	3e-05	-4.51	0.00406	0.45885	1683.96	772.692	Rac GTPase activating protein 1
219148_at	-4.094	0.03176	0.01053	4e-05	-4.253	0.00536	0.22388	456.114	102.114	PDZ binding kinase
204359_at	-4.039	0.03872	0.01053	5e-05	-1.986	0.09422	0.29088	119.832	34.8561	fibronectin leucine rich transmembrane protein 2
202503_s_at	-4.038	0.03872	0.01053	5e-05	-5.622	0.00135	0.38884	935.258	363.669	KIAA0101
203213_at	-4.039	0.03872	0.01053	5e-05	-5.885	0.00107	0.48508	2709.38	1314.28	cell division cycle 2, G1 to S and G2 to M
212097_at	-3.999	0.04396	0.01379	6e-05	-4.254	0.00535	0.54023	7695.48	4157.31	caveolin 1, caveolae protein, 22kDa
209301_at	-3.949	0.05178	0.01379	8e-05	-2.301	0.06099	0.30617	156.82	48.0134	carbonic anhydrase II
214710_s_at	-3.951	0.05178	0.01379	8e-05	-4.267	0.00528	0.35713	754.315	269.388	cyclin B1
207828_s_at	-3.934	0.05438	0.01379	8e-05	-2.881	0.02804	0.41269	460.741	190.143	centromere protein F, 350/400ka (mitosin)
203554_x_at	-3.959	0.0507	0.01379	8e-05	-2.782	0.0319	0.58117	2046.32	1189.25	pituitary tumor-transforming 1
219978_s_at	-3.913	0.0586	0.01379	9e-05	-3.7	0.01009	0.2423	418.29	101.351	nucleolar and spindle associated protein 1
203936_s_at	-3.905	0.05981	0.01379	9e-05	-0.651	0.53925	0.67514	4409.54	2977.04	matrix metalloproteinase 9 (gelatinase B, 92kDa gelatinase, 92kDa type IV collagenase)
231867_at	-3.901	0.06025	0.01379	0.0001	-2.223	0.06793	0.39172	1070.61	419.379	odz, odd Oz/ten-m homolog 2 (Drosophila)
218355_at	-3.869	0.06573	0.01416	0.00011	-8.266	0.00017	0.2475	19.5768	4.8453	kinesin family member 4A
206364_at	-3.846	0.06904	0.01416	0.00012	-7.047	0.00041	0.2046	117.341	24.0076	kinesin family member 14
1555758_a_at	-3.816	0.07646	0.01416	0.00014	-6.594	0.00058	0.22332	49.3584	11.0228	cyclin-dependent kinase inhibitor 3 (CDK2-associated dual specificity phosphatase)
228323_at	-3.8	0.07979	0.01416	0.00014	-2.857	0.0289	0.28737	118.899	34.1681	AF15q14 protein
218755_at	-3.809	0.07798	0.01416	0.00014	-4.596	0.00371	0.31374	485.315	152.264	kinesin family member 20A
206300_s_at	-3.787	0.08352	0.01416	0.00015	-1.344	0.22765	0.56766	2597.99	1474.78	parathyroid hormone-like hormone
227145_at	-3.779	0.08444	0.01416	0.00016	-1.657	0.14859	0.6071	2148.54	1304.38	lysyl oxidase-like 4
212952_at	-3.758	0.09018	0.01416	0.00017	-1.406	0.20946	0.58002	1597	926.294	---
204457_s_at	-3.751	0.09159	0.01416	0.00018	-1.821	0.11838	0.65327	4779.34	3122.21	growth arrest-specific 1
231771_at	-3.727	0.09616	0.01416	0.00019	-2.22	0.06815	0.20254	62.6124	12.6814	gap junction protein, beta 6 (connexin 30)
206102_at	-3.729	0.09616	0.01416	0.00019	-3.411	0.0143	0.2433	76.0076	18.4928	KIAA0186 gene product
205533_s_at	-3.728	0.09616	0.01416	0.00019	-2.475	0.0481	0.45514	267.245	121.632	cadherin 6, type 2, K-cadherin (fetal kidney)
222608_s_at	-3.674	0.11441	0.01575	0.00024	-3.484	0.01308	0.51443	2172.94	1117.83	anillin, actin binding protein (scraps homolog, Drosophila)
234675_x_at	-3.656	0.12159	0.01575	0.00026	-1.261	0.25396	0.63141	2623.87	1656.73	CDNA: FLJ23566 fis, clone LNG10880
203065_s_at	-3.642	0.12622	0.01575	0.00027	-2.961	0.02525	0.48493	1419.18	688.2	caveolin 1, caveolae protein, 22kDa
215177_s_at	-3.634	0.12912	0.01575	0.00028	-3.313	0.01615	0.5618	2487.76	1397.63	integrin, alpha 6
206421_s_at	-3.598	0.14273	0.01575	0.00032	-0.76	0.47592	0.53672	737.577	395.87	serine (or cysteine) proteinase inhibitor, clade B (ovalbumin), member 7
208083_s_at	-3.6	0.14256	0.01575	0.00032	-0.77	0.47064	0.53695	1180.5	633.869	integrin, beta 6
226980_at	-3.591	0.145	0.01575	0.00033	-5.522	0.00148	0.23471	91.7189	21.5269	DEP domain containing 1B
226535_at	-3.582	0.14907	0.01575	0.00034	-1.349	0.22616	0.62758	2786.68	1748.87	---
202705_at	-3.566	0.15704	0.01575	0.00036	-3.698	0.01012	0.4261	678.308	289.027	cyclin B2
206391_at	-3.555	0.163	0.01575	0.00038	-0.813	0.44703	0.64613	5227.05	3377.34	retinoic acid receptor responder (tazarotene induced) 1
231879_at	-3.51	0.18878	0.01985	0.00045	-1.441	0.19978	0.39177	32.6105	12.7757	collagen, type XII, alpha 1
218663_at	-3.503	0.19199	0.01985	0.00046	-3.813	0.00883	0.35924	65.458	23.5149	chromosome condensation protein G
213611_at	-3.47	0.21535	0.02121	0.00052	-1.821	0.11847	0.32305	343.445	110.951	aquaporin 5
210052_s_at	-3.461	0.221	0.0219	0.00054	-6.226	0.00079	0.37245	339.856	126.578	TPX2, microtubule-associated protein homolog (Xenopus laevis)
214580_x_at	-3.452	0.22688	0.0219	0.00056	-2.361	0.05618	0.62825	11692.8	7345.95	keratin 6A /// keratin 6B /// keratin 6C /// keratin 6E
212236_x_at	-3.443	0.2331	0.0219	0.00058	-2.89	0.0277	0.6141	12378.6	7601.72	keratin 17
225687_at	-3.418	0.2501	0.02302	0.00063	-3.545	0.01214	0.43608	624.62	272.387	chromosome 20 open reading frame 129
222108_at	-3.41	0.25586	0.02302	0.00065	-1.294	0.2433	0.49659	641.069	318.347	amphoterin induced gene 2
204026_s_at	-3.374	0.28555	0.02394	0.00074	-3.809	0.00887	0.51655	1197.43	618.532	ZW10 interactor
211756_at	-3.353	0.29932	0.02449	0.0008	-1.389	0.21428	0.62299	5754.88	3585.23	parathyroid hormone-like hormone /// parathyroid hormone-like hormone
203418_at	-3.347	0.30335	0.02449	0.00082	-4.607	0.00366	0.29161	37.424	10.9134	cyclin A2
201860_s_at	-3.336	0.31437	0.02468	0.00085	-0.608	0.56557	0.67171	2314.82	1554.89	plasminogen activator, tissue
209277_at	-3.325	0.32173	0.02468	0.00088	-1.416	0.20658	0.51263	620.185	317.925	tissue factor pathway inhibitor 2
209464_at	-3.317	0.3293	0.02468	0.00091	-4.296	0.00511	0.2745	57.5483	15.797	aurora kinase B
209126_x_at	-3.299	0.34474	0.02468	0.00097	-2.21	0.06919	0.59434	6243.21	3710.56	keratin 6B
203764_at	-3.278	0.36123	0.02609	0.00104	-4.264	0.0053	0.30126	463.135	139.522	discs, large homolog 7 (Drosophila)
208079_s_at	-3.26	0.37789	0.02609	0.00111	-3.237	0.01776	0.44032	402.417	177.192	serine/threonine kinase 6
201843_s_at	-3.262	0.37789	0.02609	0.00111	-4.07	0.00658	0.61187	1634.76	1000.25	EGF-containing fibulin-like extracellular matrix protein 1
208808_s_at	-3.243	0.39902	0.02716	0.00118	-3.186	0.01894	0.63215	5863.81	3706.83	high-mobility group box 2
227350_at	-3.238	0.40414	0.02822	0.0012	-2.586	0.04141	0.37433	275.645	103.183	CDNA FLJ11381 fis, clone HEMBA1000501
213240_s_at	-3.231	0.4101	0.02909	0.00124	-1.298	0.24181	0.61356	2329.13	1429.05	keratin 4
205328_at	-3.208	0.43797	0.0314	0.00134	-1.579	0.16539	0.36751	265.635	97.6241	claudin 10
205532_s_at	-3.202	0.44348	0.0314	0.00136	-3.056	0.02233	0.60853	1826.75	1111.63	cadherin 6, type 2, K-cadherin (fetal kidney)
219787_s_at	-3.184	0.46945	0.0314	0.00145	-3.569	0.0118	0.58794	1679.88	987.663	epithelial cell transforming sequence 2 oncogene
206504_at	-3.18	0.47331	0.0314	0.00147	-1.872	0.11045	0.35823	71.1126	25.4747	cytochrome P450, family 24, subfamily A, polypeptide 1
204962_s_at	-3.173	0.47707	0.03237	0.00151	-4.441	0.00437	0.31129	71.9395	22.3939	centromere protein A, 17kDa
214041_x_at	-3.141	0.52925	0.04	0.00168	-1.14	0.29785	0.71227	2766.57	1970.53	---
224549_x_at	-3.134	0.5383	0.04	0.00172	-1.436	0.20106	0.65412	1800.9	1177.99	---
202345_s_at	-3.105	0.59117	0.04091	0.0019	-3.221	0.01813	0.71711	22664	16252.5	fatty acid binding protein 5 (psoriasis-associated)
203214_x_at	-3.064	0.66795	0.04372	0.00219	-3.325	0.01591	0.46174	962.576	444.461	cell division cycle 2, G1 to S and G2 to M
209125_at	-3.055	0.68023	0.04372	0.00225	-1.718	0.13667	0.69303	12485.2	8652.54	keratin 6A /// keratin 6C /// keratin 6E
225834_at	-3.051	0.68207	0.04372	0.00228	-3.027	0.02317	0.296	48.661	14.4037	Similar to RIKEN cDNA 2700049P18 gene
228969_at	-3.052	0.68207	0.04372	0.00228	-2.193	0.07082	0.69137	4056.84	2804.77	anterior gradient 2 homolog (Xenopus laevis)
219795_at	-3.043	0.69632	0.04457	0.00234	-6.596	0.00058	0.65712	11580.1	7609.54	solute carrier family 6 (neurotransmitter transporter), member 14
227529_s_at	-3.035	0.70777	0.04467	0.00241	-0.922	0.39212	0.43034	26.2347	11.2899	A kinase (PRKA) anchor protein (gravin) 12
201088_at	-3.007	0.76399	0.04467	0.00264	-4.194	0.00572	0.65873	7238.28	4768.1	karyopherin alpha 2 (RAG cohort 1, importin alpha 1)
210517_s_at	-2.989	0.80014	0.04467	0.0028	-1.143	0.29668	0.535	458.214	245.146	A kinase (PRKA) anchor protein (gravin) 12
204614_at	-2.988	0.80014	0.04467	0.00281	-1.468	0.19252	0.68328	6138.48	4194.3	serine (or cysteine) proteinase inhibitor, clade B (ovalbumin), member 2
202095_s_at	-2.986	0.8004	0.04467	0.00283	-3.686	0.01026	0.37028	27.6043	10.2213	baculoviral IAP repeat-containing 5 (survivin)
204162_at	-2.982	0.80808	0.04467	0.00287	-3.654	0.01066	0.26976	231.01	62.3175	kinetochore associated 2
219250_s_at	-2.978	0.81359	0.04467	0.0029	-1.806	0.12089	0.5055	591.872	299.193	fibronectin leucine rich transmembrane protein 3
202870_s_at	-2.964	0.84318	0.04467	0.00304	-3.426	0.01404	0.43613	1121.98	489.328	TNF receptor-associated factor 4
209408_at	-2.928	0.92357	0.05149	0.00341	-2.987	0.0244	0.34736	19.1499	6.65185	kinesin family member 2C
204146_at	-2.889	1	0.05922	0.00386	-3.339	0.01564	0.41428	218.464	90.5051	RAD51 associated protein 1
208084_at	-2.889	1	0.05922	0.00387	-0.897	0.40439	0.40157	631.056	253.415	integrin, beta 6
204363_at	-2.877	1	0.06058	0.00401	-1.204	0.27382	0.77526	14583.2	11305.7	coagulation factor III (thromboplastin, tissue factor)
225655_at	-2.861	1	0.06124	0.00422	-2.79	0.03157	0.28994	173.507	50.3071	ubiquitin-like, containing PHD and RING finger domains, 1
206392_s_at	-2.85	1	0.06256	0.00437	-0.593	0.57456	0.72372	7186.55	5201.01	retinoic acid receptor responder (tazarotene induced) 1
218662_s_at	-2.848	1	0.06256	0.0044	-3.602	0.01133	0.42378	481.87	204.205	chromosome condensation protein G
210559_s_at	-2.84	1	0.06355	0.00452	-3.162	0.0195	0.48174	1032.15	497.227	cell division cycle 2, G1 to S and G2 to M
203276_at	-2.821	1	0.06455	0.00479	-3.721	0.00984	0.30912	267.069	82.556	lamin B1
216442_x_at	-2.813	1	0.06455	0.00491	-0.401	0.70201	0.45156	44.2057	19.9616	fibronectin 1
201110_s_at	-2.803	1	0.06455	0.00506	-1.26	0.25442	0.52972	1948.71	1032.28	thrombospondin 1
212671_s_at	-2.796	1	0.06455	0.00518	-0.325	0.75625	0.69263	28.7665	19.9245	major histocompatibility complex, class II, DQ alpha 1 /// major histocompatibility complex, class II, DQ alpha 2
208607_s_at	-2.762	1	0.06964	0.00575	-1.069	0.3261	0.63709	3815.41	2430.76	serum amyloid A1 /// serum amyloid A1 /// serum amyloid A2 /// serum amyloid A2
203755_at	-2.749	1	0.0708	0.00597	-4.025	0.00692	0.25662	66.6075	17.0926	BUB1 budding uninhibited by benzimidazoles 1 homolog beta (yeast)
232278_s_at	-2.745	1	0.0708	0.00605	-4.454	0.00431	0.3232	32.7968	10.5998	DEP domain containing 1
223278_at	-2.735	1	0.07105	0.00623	-2.805	0.03097	0.63143	9572.72	6044.53	gap junction protein, beta 2, 26kDa (connexin 26)
1554768_a_at	-2.728	1	0.07304	0.00638	-2.17	0.07304	0.46255	589.887	272.852	MAD2 mitotic arrest deficient-like 1 (yeast)
AFFX-M27830_5_at	-2.727	1	0.07304	0.00639	-0.977	0.3661	0.45405	169.533	76.9774	SRY (sex determining region Y)-box 18
241669_x_at	-2.723	1	0.0735	0.00646	-0.965	0.37193	0.70534	1878.43	1324.94	---
1552619_a_at	-2.691	1	0.07595	0.00713	-2.366	0.05584	0.51224	935.029	478.959	anillin, actin binding protein (scraps homolog, Drosophila)
218585_s_at	-2.683	1	0.07731	0.0073	-2.776	0.03215	0.38428	51.6188	19.8359	RA-regulated nuclear matrix-associated protein
226880_at	-2.644	1	0.08093	0.0082	-2.336	0.0582	0.69416	7943.08	5513.8	nuclear ubiquitous casein kinase and cyclin-dependent kinase substrate
1558048_x_at	-2.643	1	0.08093	0.00821	-0.722	0.49758	0.73664	600.712	442.511	---
204444_at	-2.64	1	0.08093	0.0083	-3.447	0.01369	0.37825	345.819	130.806	kinesin family member 11
211909_x_at	-2.631	1	0.08093	0.00852	-0.802	0.4529	0.73749	1134.53	836.705	prostaglandin E receptor 3 (subtype EP3) /// prostaglandin E receptor 3 (subtype EP3)
203362_s_at	-2.615	1	0.08093	0.00891	-3.543	0.01217	0.6047	3135.18	1895.85	MAD2 mitotic arrest deficient-like 1 (yeast)
200598_s_at	-2.609	1	0.08093	0.00909	-1.561	0.16943	0.7491	9613.68	7201.58	tumor rejection antigen (gp96) 1
209173_at	-2.609	1	0.08093	0.00909	-1.471	0.19172	0.82745	25606.4	21188	anterior gradient 2 homolog (Xenopus laevis)
242579_at	-2.603	1	0.08295	0.00925	-1.786	0.12433	0.61721	692.357	427.332	Transcribed locus
213975_s_at	-2.598	1	0.08385	0.00936	-1.582	0.16469	0.62158	795.253	494.313	lysozyme (renal amyloidosis) /// leukocyte immunoglobulin-like receptor, subfamily B (with TM and ITIM domains), member 1
226085_at	-2.596	1	0.08506	0.00943	-2.145	0.07558	0.46146	2132.85	984.222	Chromobox homolog 5 (HP1 alpha homolog, Drosophila)
214456_x_at	-2.571	1	0.08996	0.01013	-1.042	0.33759	0.71145	4516.9	3213.55	serum amyloid A1
235737_at	-2.571	1	0.08996	0.01014	-1.246	0.25905	0.60825	1105.02	672.126	thymic stromal lymphopoietin
231766_s_at	-2.565	1	0.09037	0.01032	-1.088	0.31836	0.40451	50.255	20.3287	collagen, type XII, alpha 1
209642_at	-2.556	1	0.09191	0.01058	-3.048	0.02257	0.46799	219.625	102.782	BUB1 budding uninhibited by benzimidazoles 1 homolog (yeast)
209788_s_at	-2.551	1	0.09203	0.01075	-0.829	0.43886	0.70072	1068.58	748.779	type 1 tumor necrosis factor receptor shedding aminopeptidase regulator
229353_s_at	-2.548	1	0.09203	0.01082	-1.609	0.1588	0.69362	6504.9	4511.94	nuclear ubiquitous casein kinase and cyclin-dependent kinase substrate
213655_at	-2.547	1	0.09203	0.01088	-1.182	0.28201	0.74971	6847.93	5133.99	---
214316_x_at	-2.535	1	0.0947	0.01125	-0.995	0.35812	0.74347	2541.24	1889.33	---
216627_s_at	-2.534	1	0.0947	0.01127	-1.05	0.33436	0.39478	265.705	104.896	UDP-Gal:betaGlcNAc beta 1,4- galactosyltransferase, polypeptide 1
209101_at	-2.532	1	0.0947	0.01134	-2.712	0.03501	0.76841	10298.3	7913.38	connective tissue growth factor
208712_at	-2.529	1	0.0947	0.01143	-2.553	0.04333	0.63246	2413.16	1526.23	cyclin D1 (PRAD1: parathyroid adenomatosis 1)
202267_at	-2.529	1	0.0947	0.01144	-1.044	0.33675	0.73386	4165.98	3057.25	laminin, gamma 2
205681_at	-2.525	1	0.0947	0.01157	-0.885	0.41013	0.53484	115.161	61.5932	BCL2-related protein A1
226811_at	-2.515	1	0.0993	0.01189	-2.934	0.02616	0.66351	1930.25	1280.74	family with sequence similarity 46, member C
202534_x_at	-2.515	1	0.0993	0.01189	-1.823	0.11821	0.679	1824.97	1239.16	dihydrofolate reductase
203560_at	-2.5	1	0.10592	0.01242	-2.108	0.07955	0.63598	1714.28	1090.26	gamma-glutamyl hydrolase (conjugase, folylpolygammaglutamyl hydrolase)
204709_s_at	-2.492	1	0.11042	0.0127	-4.446	0.00435	0.38787	112.636	43.6885	kinesin family member 23
221872_at	-2.486	1	0.11211	0.01291	-0.832	0.43708	0.72976	7252.57	5292.6	retinoic acid receptor responder (tazarotene induced) 1
219380_x_at	-2.479	1	0.11604	0.01319	-1.592	0.16245	0.62979	617.643	388.987	polymerase (DNA directed), eta
1552516_a_at	-2.477	1	0.11604	0.01324	-1.939	0.10064	0.49951	327.862	163.769	homeodomain interacting protein kinase 1
1554408_a_at	-2.464	1	0.11785	0.01373	-3.446	0.01369	0.35606	123.647	44.0262	thymidine kinase 1, soluble
226237_at	-2.463	1	0.11785	0.01377	-1.425	0.20393	0.44524	30.0502	13.3794	Collagen, type VIII, alpha 1
229538_s_at	-2.456	1	0.118	0.01406	-3.562	0.0119	0.3013	17.3777	5.2359	IQ motif containing GTPase activating protein 3
223381_at	-2.449	1	0.11815	0.01432	-2.968	0.02503	0.36326	174.206	63.2822	cell division cycle associated 1
211762_s_at	-2.445	1	0.11815	0.01447	-5.181	0.00205	0.65496	4269.1	2796.07	karyopherin alpha 2 (RAG cohort 1, importin alpha 1) /// karyopherin alpha 2 (RAG cohort 1, importin alpha 1)
221922_at	-2.438	1	0.12039	0.01479	-2.254	0.0651	0.66617	1026.69	683.944	G-protein signalling modulator 2 (AGS3-like, C. elegans)
204822_at	-2.406	1	0.13077	0.01612	-3.135	0.02019	0.30936	79.3009	24.5325	TTK protein kinase
213680_at	-2.396	1	0.13544	0.01659	-0.965	0.37192	0.30666	92.9521	28.5042	keratin 6B
225355_at	-2.391	1	0.13544	0.01679	-2.623	0.03944	0.61645	1166.09	718.829	hypothetical protein DKFZP761M1511
236641_at	-2.378	1	0.1373	0.01742	-3.251	0.01744	0.40834	13.2193	5.39794	Kinesin family member 14
224428_s_at	-2.368	1	0.13827	0.01789	-1.451	0.19704	0.47708	145.062	69.2069	cell division cycle associated 7 /// cell division cycle associated 7
235545_at	-2.362	1	0.14085	0.01815	-2.697	0.03573	0.44487	60.633	26.974	DEP domain containing 1
204748_at	-2.361	1	0.14085	0.01821	-0.7	0.5104	0.67632	547.339	370.176	prostaglandin-endoperoxide synthase 2 (prostaglandin G/H synthase and cyclooxygenase)
1558080_s_at	-2.359	1	0.14085	0.01833	-1.814	0.11959	0.49982	2426.29	1212.69	hypothetical protein LOC144871
210355_at	-2.342	1	0.14518	0.01917	-1.139	0.29803	0.72642	3852.93	2798.85	parathyroid hormone-like hormone
229994_at	-2.324	1	0.14926	0.02013	-1.072	0.32493	0.61636	294.546	181.547	---
235775_at	-2.324	1	0.14926	0.02013	-1.162	0.28938	0.6261	1521.43	952.568	hypothetical protein DKFZp762A217
201431_s_at	-2.304	1	0.15233	0.02124	-1.377	0.2177	0.55823	432.448	241.404	dihydropyrimidinase-like 3
211714_x_at	-2.299	1	0.15331	0.02151	-2.701	0.03552	0.77942	7592.4	5917.68	tubulin, beta polypeptide /// tubulin, beta polypeptide
1557094_at	-2.296	1	0.15331	0.02167	-1.986	0.09424	0.67455	1138.94	768.273	Annexin A8
229097_at	-2.283	1	0.15897	0.02241	-5.991	0.00097	0.41286	25.1959	10.4024	Transcribed locus
201664_at	-2.279	1	0.15966	0.02269	-4.327	0.00494	0.60859	789.209	480.303	SMC4 structural maintenance of chromosomes 4-like 1 (yeast)
219117_s_at	-2.261	1	0.16713	0.02375	-1.657	0.14866	0.71831	1180.64	848.069	FK506 binding protein 11, 19 kDa
229490_s_at	-2.257	1	0.16833	0.02402	-2.921	0.02661	0.41622	100.924	42.0065	---
205436_s_at	-2.247	1	0.17127	0.02463	-4.163	0.00592	0.63767	2344.19	1494.82	H2A histone family, member X
207850_at	-2.229	1	0.17984	0.02584	-0.926	0.38996	0.68225	314.839	214.798	chemokine (C-X-C motif) ligand 3
228297_at	-2.228	1	0.17995	0.0259	-0.717	0.50011	0.80489	4708.68	3789.97	---
224851_at	-2.227	1	0.17995	0.02593	-1.821	0.11852	0.66093	1587.24	1049.06	cyclin-dependent kinase 6
228121_at	-2.226	1	0.18	0.026	-2.231	0.06721	0.63734	723.993	461.43	Transforming growth factor, beta 2
204030_s_at	-2.211	1	0.18445	0.02703	-4.602	0.00369	0.61861	593.65	367.236	schwannomin interacting protein 1
201645_at	-2.2	1	0.1878	0.02783	-0.716	0.50069	0.77306	4173.33	3226.23	tenascin C (hexabrachion)
204141_at	-2.184	1	0.1958	0.02894	-1.001	0.35546	0.80498	2672.55	2151.35	tubulin, beta 2
212242_at	-2.173	1	0.20052	0.02975	-2.777	0.03212	0.70441	3818.09	2689.49	tubulin, alpha 1 (testis specific)
205399_at	-2.169	1	0.20309	0.03008	-0.475	0.65179	0.78411	976.127	765.391	doublecortin and CaM kinase-like 1
209709_s_at	-2.164	1	0.20566	0.03044	-2.652	0.03795	0.39505	94.4217	37.301	hyaluronan-mediated motility receptor (RHAMM)
1554390_s_at	-2.154	1	0.21125	0.03123	-1.099	0.31381	0.782	1930.39	1509.56	ARP2 actin-related protein 2 homolog (yeast)
209026_x_at	-2.143	1	0.21472	0.03208	-2.443	0.05026	0.76576	6540.27	5008.28	tubulin, beta polypeptide
212364_at	-2.139	1	0.21814	0.03246	-2.794	0.03141	0.73731	4663.39	3438.37	myosin IB
229975_at	-2.138	1	0.21814	0.03254	-2.101	0.08039	0.74442	1722.95	1282.59	Transcribed locus
205187_at	-2.134	1	0.2204	0.03287	-2.068	0.08413	0.6889	1070.55	737.5	SMAD, mothers against DPP homolog 5 (Drosophila)
212451_at	-2.132	1	0.2204	0.03302	-0.852	0.42681	0.71074	632.571	449.594	KIAA0256 gene product
226279_at	-2.127	1	0.22134	0.03345	-4.43	0.00442	0.75801	5240.9	3972.67	protease, serine, 23
235425_at	-2.099	1	0.23463	0.03579	-2.993	0.02421	0.50213	459.776	230.866	shugoshin-like 2 (S. pombe)
1558333_at	-2.094	1	0.23893	0.03629	-0.874	0.41588	0.70019	264.305	185.065	chromosome 22 open reading frame 15
200999_s_at	-2.087	1	0.24048	0.03693	-2.01	0.09121	0.75929	2971.23	2256.02	cytoskeleton-associated protein 4
229128_s_at	-2.075	1	0.24604	0.03797	-1.06	0.32996	0.71673	1285.15	921.111	---
206033_s_at	-2.066	1	0.25048	0.0388	-1.697	0.14056	0.67217	1309.01	879.88	desmocollin 3
244107_at	-2.057	1	0.25755	0.03968	-1.384	0.21572	0.4939	59.1349	29.2065	---
203126_at	-2.05	1	0.26165	0.04038	-2.493	0.04695	0.72124	1862.2	1343.1	inositol(myo)-1(or 4)-monophosphatase 2
205239_at	-2.04	1	0.26729	0.04131	-1.309	0.23855	0.49456	300.626	148.678	amphiregulin (schwannoma-derived growth factor)
214803_at	-2.04	1	0.26729	0.04137	-1.8	0.12193	0.6938	1837.37	1274.76	---
201117_s_at	-2.035	1	0.27133	0.04186	-2.035	0.08801	0.64374	464.921	299.289	carboxypeptidase E
206561_s_at	-2.031	1	0.27146	0.04226	-0.92	0.39296	0.71969	1723.41	1240.32	aldo-keto reductase family 1, member B10 (aldose reductase)
227801_at	-2.03	1	0.27159	0.04236	-3.52	0.01253	0.64548	545.14	351.879	tripartite motif-containing 59
209932_s_at	-2.017	1	0.27443	0.04366	-1.689	0.1421	0.76841	4028.65	3095.68	dUTP pyrophosphatase
203414_at	-2.011	1	0.28018	0.04432	-2.612	0.04	0.62909	512.18	322.205	monocyte to macrophage differentiation-associated
205097_at	-2.008	1	0.28318	0.04466	-1.54	0.17437	0.50932	450.432	229.416	solute carrier family 26 (sulfate transporter), member 2
219544_at	-1.997	1	0.287	0.04584	-1.02	0.34712	0.6708	64.9758	43.5856	FLJ22624 protein
227530_at	-1.988	1	0.28717	0.0468	-0.764	0.47409	0.58665	66.7703	39.1709	A kinase (PRKA) anchor protein (gravin) 12
220723_s_at	-1.975	1	0.29781	0.04824	-0.878	0.41353	0.75591	1064.29	804.508	hypothetical protein FLJ21511
235287_at	-1.973	1	0.29847	0.04844	-1.106	0.31097	0.51523	167.125	86.1076	cyclin-dependent kinase 6
222740_at	-1.971	1	0.29978	0.04878	-2.295	0.06152	0.6328	497.11	314.57	ATPase family, AAA domain containing 2
208498_s_at	-1.969	1	0.29978	0.04892	-0.508	0.62979	0.57521	899.895	517.626	amylase, alpha 2A; pancreatic
209754_s_at	-1.969	1	0.29978	0.04892	-1.689	0.14216	0.66102	367.248	242.759	thymopoietin
204364_s_at	-1.965	1	0.30064	0.04936	-0.437	0.67743	0.80688	771.268	622.322	chromosome 2 open reading frame 23
201930_at	-1.965	1	0.30064	0.04937	-2.868	0.02849	0.54097	219.929	118.975	MCM6 minichromosome maintenance deficient 6 (MIS5 homolog, S. pombe) (S. cerevisiae)
201883_s_at	-1.963	1	0.30064	0.04964	-0.514	0.62536	0.65554	237.701	155.824	UDP-Gal:betaGlcNAc beta 1,4- galactosyltransferase, polypeptide 1
203633_at	-1.961	1	0.30064	0.04992	-2.868	0.02849	0.60659	674.025	408.854	carnitine palmitoyltransferase 1A (liver)

## Sheet: Up SMM 6hr vs PBS 6hr
probe.name	z.stat	fdr.BH	fdr.RE	z.pv	t.stat	t.pv	fc2power	mexpcon	mexptrt	gene.name
205476_at	13.045	0	0	0	6.178	0.00349	6.75431	4701.41	31754.8	chemokine (C-C motif) ligand 20
207850_at	11.554	0	0	0	7.456	0.00173	16.7658	394.779	6618.76	chemokine (C-X-C motif) ligand 3
214974_x_at	10.612	0	0	0	7.848	0.00142	41.6548	46.9885	1957.3	chemokine (C-X-C motif) ligand 5
1554997_a_at	10.328	0	0	0	7.444	0.00174	51.5446	18.9754	978.078	prostaglandin-endoperoxide synthase 2 (prostaglandin G/H synthase and cyclooxygenase)
215101_s_at	9.282	0	0	0	4.68	0.00945	31.2242	5.5236	172.47	chemokine (C-X-C motif) ligand 5
206336_at	9.194	0	0	0	5.013	0.00742	4.92401	2304.47	11347.2	chemokine (C-X-C motif) ligand 6 (granulocyte chemotactic protein 2)
207356_at	9.147	0	0	0	5.707	0.00466	17.3865	123.034	2139.14	defensin, beta 4
211506_s_at	8.997	0	0	0	7.222	0.00195	3.87354	5393.94	20893.7	interleukin 8
204748_at	8.986	0	0	0	5.994	0.0039	17.4906	203.873	3565.86	prostaglandin-endoperoxide synthase 2 (prostaglandin G/H syntase and cyclooxygenase)
207442_at	8.972	0	0	0	6.997	0.0022	25.6381	10.7043	274.436	colony stimulating factor 3 (granulocyte)
202376_at	8.915	0	0	0	12.32	0.00025	4.87831	2229.57	10876.5	serine (or cysteine) proteinase inhibitor, clade A (alpha-1 antiproteinase, antitrypsin),member 3
206529_x_at	8.673	0	0	0	8.61	0.001	31.334	22.1434	693.841	solute carrier family 26, member 4
209774_x_at	8.574	0	0	0	8.204	0.0012	5.69562	1468.68	8365.05	chemokine (C-X-C motif) ligand 2
230615_at	7.801	0	0.00826	0	6.428	0.00301	18.4576	7.19112	132.731	similar to Numb-interacting homolog gene
201925_s_at	7.356	0	0.00826	0	3.529	0.02425	4.35864	1662.03	7244.17	decay accelerating factor for complement (CD55, Cromer blood group system)
202510_s_at	7.259	0	0.00826	0	3.19	0.03321	6.28009	376.808	2366.39	tumor necrosis factor, alpha-induced protein 2
215223_s_at	7.217	0	0.00826	0	5.156	0.00672	5.89052	623.288	3671.49	superoxide dismutase 2, mitochondrial
208300_at	7.165	0	0.00826	0	6.465	0.00295	14.8029	10.845	160.538	protein tyrosine phosphatase, receptor type, H
217388_s_at	7.12	0	0.00826	0	8.017	0.00131	3.22421	3089.93	9962.58	kynureninase (L-kynurenine hydrolase)
220745_at	7.087	0	0.00826	0	11.705	0.0003	18.8633	12.0995	228.237	interleukin 19
36711_at	7.048	0	0.00826	0	5.594	0.00501	5.09035	614.957	3130.34	v-maf musculoaponeurotic fibrosarcoma oncogene homolog F (avian)
204385_at	7.046	0	0.00826	0	9.582	0.00066	4.152	849.705	3527.98	kynureninase (L-kynurenine hydrolase)
205207_at	7.042	0	0.00826	0	4.51	0.01074	14.8298	5.7825	85.7535	interleukin 6 (interferon, beta 2)
218541_s_at	6.897	0	0.00826	0	16.163	9e-05	4.09078	1134.4	4640.61	chromosome 8 open reading frame 4
205681_at	6.817	0	0.00991	0	6.135	0.00358	9.01038	190.575	1717.16	BCL2-related protein A1
203691_at	6.816	0	0.00991	0	1.836	0.14025	3.8483	1031.6	3969.89	protease inhibitor 3, skin-derived (SKALP) /// protease inhibitor 3, skin-derived (SKALP)
201860_s_at	6.738	0	0.00991	0	1.271	0.27261	2.71838	4137.66	11247.8	plasminogen activator, tissue
1555167_s_at	6.689	0	0.00991	0	8.061	0.00129	4.452	484.393	2156.52	pre-B-cell colony enhancing factor 1
209189_at	6.645	0	0.00991	0	3.268	0.03085	5.64182	150.102	846.847	v-fos FBJ murine osteosarcoma viral oncogene homolog
218810_at	6.638	0	0.00991	0	6.836	0.0024	5.29629	320.464	1697.27	hypothetical protein FLJ23231
41469_at	6.595	0	0.00991	0	1.932	0.12559	3.62475	1112.09	4031.05	protease inhibitor 3, skin-derived (SKALP)
225344_at	6.562	0	0.00991	0	12.344	0.00025	2.58925	4824.43	12491.7	nuclear receptor coactivator 7
211906_s_at	6.555	0	0.00991	0	9.022	0.00084	2.13882	10274.4	21975.1	serine (or cysteine) proteinase inhibitor, clade B (ovalbumin), member 4 /// serine (or cysteine) proteinase inhibitor, clade B (ovalbumin), member 4
210538_s_at	6.526	0	0.00991	0	6.506	0.00288	6.3314	526.184	3331.48	baculoviral IAP repeat-containing 3
210663_s_at	6.263	0	0.00991	0	7.929	0.00137	3.88465	950.413	3692.02	kynureninase (L-kynurenine hydrolase)
209457_at	6.242	0	0.00991	0	3.55	0.02381	5.59718	284.801	1594.08	dual specificity phosphatase 5
201631_s_at	6.186	0	0.00991	0	6.192	0.00346	2.84089	2557.57	7265.78	immediate early response 3
217739_s_at	6.152	0	0.00991	0	8.166	0.00122	2.74071	3871.78	10611.4	pre-B-cell colony enhancing factor 1
205844_at	6.139	0	0.00991	0	14.611	0.00013	14.6939	14.9329	219.424	vanin 1 /// vanin 1
230746_s_at	5.961	0	0.00991	0	11.314	0.00035	3.77445	725.727	2739.22	---
217738_at	5.96	0	0.00991	0	6.779	0.00247	2.90619	1746.59	5075.91	pre-B-cell colony enhancing factor 1
223484_at	5.935	0	0.00991	0	3.405	0.02716	2.35423	5258.76	12380.3	normal mucosa of esophagus specific 1
1555950_a_at	5.797	1e-05	0.00991	0	4.621	0.00987	2.96415	1804.35	5348.38	decay accelerating factor for complement (CD55, Cromer blood group system)
228964_at	5.764	1e-05	0.00991	0	10.649	0.00044	10.2272	27.5541	281.803	PR domain containing 1, with ZNF domain
216841_s_at	5.761	1e-05	0.00991	0	4.336	0.01229	4.62726	650.937	3012.06	superoxide dismutase 2, mitochondrial
205659_at	5.726	1e-05	0.00991	0	4.747	0.00899	6.70048	135.15	905.568	histone deacetylase 9
202912_at	5.674	2e-05	0.00991	0	5.584	0.00504	3.46452	1700.82	5892.52	adrenomedullin
210118_s_at	5.643	2e-05	0.00991	0	6.105	0.00364	10.9052	24.1282	263.123	interleukin 1, alpha
205959_at	5.635	2e-05	0.00991	0	2.917	0.04335	3.9913	390.641	1559.17	matrix metalloproteinase 13 (collagenase 3) /// matrix m
210845_s_at	5.609	2e-05	0.00991	0	4.488	0.01092	4.50969	183.423	827.183	plasminogen activator, urokinase receptor
206467_x_at	5.487	4e-05	0.00991	0	6.166	0.00351	7.60052	9.31833	70.8242	tumor necrosis factor receptor superfamily, member 6b, decoy /// regulator of telomere elongation helicase 1
210517_s_at	5.469	5e-05	0.00991	0	1.437	0.22419	2.01959	1544.98	3120.23	A kinase (PRKA) anchor protein (gravin) 12
210029_at	5.469	5e-05	0.00991	0	3.545	0.0239	9.08984	22.0366	200.309	indoleamine-pyrrole 2,3 dioxygenase
206421_s_at	5.444	5e-05	0.00991	0	1.789	0.14809	6.48889	351.939	2283.69	serine (or cysteine) proteinase inhibitor, clade B (ovalbumin), member 7
202859_x_at	5.427	6e-05	0.00991	0	11.493	0.00033	2.02434	10872.8	22010.2	KIAA0476
205027_s_at	5.419	6e-05	0.00991	0	4.806	0.00861	4.65892	240.742	1121.6	mitogen-activated protein kinase kinase kinase 8
204908_s_at	5.366	8e-05	0.00991	0	4.915	0.00796	3.22816	809.462	2613.07	B-cell CLL/lymphoma 3
211668_s_at	5.347	8e-05	0.00991	0	2.29	0.08383	2.51996	767.341	1933.67	plasminogen activator, urokinase /// plasminogen activator, urokinase
202643_s_at	5.338	9e-05	0.00991	0	12.974	0.0002	3.41013	877.435	2992.17	tumor necrosis factor, alpha-induced protein 3
202638_s_at	5.331	9e-05	0.00991	0	7.654	0.00157	9.48365	40.1575	380.84	intercellular adhesion molecule 1 (CD54), human rhinovirus receptor
205890_s_at	5.29	0.00011	0.01239	0	1.668	0.1706	5.99736	57.6996	346.045	ubiquitin D
1566342_at	5.246	0.00014	0.01239	0	6.686	0.0026	3.93169	576.83	2267.91	---
202644_s_at	5.237	0.00014	0.01239	0	11.033	0.00038	2.90325	1654.72	4804.06	tumor necrosis factor, alpha-induced protein 3
205479_s_at	5.163	0.0002	0.01239	0	2.342	0.07918	2.77996	707.176	1965.92	plasminogen activator, urokinase
232082_x_at	5.142	0.00023	0.01239	0	8.85	0.0009	5.76806	142.009	819.119	---
221477_s_at	5.1	0.00028	0.01239	0	3.156	0.03431	2.7629	757.707	2093.47	FLJ43505 protein
232504_at	5.069	0.00032	0.01239	0	5.14	0.00679	9.39932	6.28084	59.0356	hypothetical protein LOC285628
222847_s_at	5.052	0.00035	0.01239	0	7.747	0.0015	4.03621	393.042	1586.4	egl nine homolog 3 (C. elegans)
218498_s_at	5.026	0.00039	0.01239	0	6.752	0.00251	2.73081	1504.92	4109.67	ERO1-like (S. cerevisiae)
201502_s_at	4.977	0.0005	0.01239	0	5.44	0.00554	2.59985	2340.99	6086.22	nuclear factor of kappa light polypeptide gene enhancer in B-cells inhibitor, alpha
208539_x_at	4.971	0.00051	0.01239	0	6.938	0.00227	3.09873	389.613	1207.31	small proline-rich protein 2A
219795_at	4.936	0.0006	0.01239	0	6.113	0.00363	1.72933	12736.2	22025	solute carrier family 6 (neurotransmitter transporter), member 14
223218_s_at	4.934	0.0006	0.01239	0	8.775	0.00093	3.06846	1591.8	4884.36	nuclear factor of kappa light polypeptide gene enhancer
209652_s_at	4.917	0.00064	0.01239	0	4.522	0.01065	5.03283	43.4546	218.699	placental growth factor, vascular endothelial growth factor-related protein
216243_s_at	4.884	0.00075	0.01239	0	1.532	0.2003	1.761	2001.35	3524.36	interleukin 1 receptor antagonist
204470_at	4.838	0.00093	0.01239	0	5.908	0.00411	2.14323	6887.34	14761.1	chemokine (C-X-C motif) ligand 1 (melanoma growth stimulating activity alpha)
227530_at	4.834	0.00094	0.01239	0	1.352	0.24776	2.2538	398.953	899.162	A kinase (PRKA) anchor protein (gravin) 12
236045_x_at	4.818	0.001	0.01239	0	6.016	0.00385	4.83309	74.4467	359.808	LOC441801
206300_s_at	4.815	0.00101	0.01239	0	2.249	0.08775	1.99751	1797.24	3590.01	parathyroid hormone-like hormone
211924_s_at	4.784	0.00116	0.01508	0	4.114	0.01468	3.60905	327.713	1182.73	plasminogen activator, urokinase receptor /// plasminogen activator, urokinase receptor
201926_s_at	4.775	0.0012	0.01508	0	4.452	0.01123	3.00728	1675.56	5038.88	decay accelerating factor for complement (CD55, Cromer blood group
202637_s_at	4.745	0.00138	0.01508	0	9.504	0.00068	5.62286	73.0967	411.012	intercellular adhesion molecule 1 (CD54), human rhinovirus receptor
209921_at	4.701	0.00168	0.01508	0	1.645	0.17525	5.68496	75.0533	426.675	solute carrier family 7, (cationic amino acid transporter, y+ system), member 11
207535_s_at	4.692	0.00172	0.01508	0	4.098	0.01488	7.23165	41.6034	300.861	nuclear factor of kappa light polypeptide gene enhancer in B-cells 2 (p49/p100)
223217_s_at	4.62	0.00241	0.01508	0	8.731	0.00095	3.17449	769.143	2441.63	nuclear factor of kappa light polypeptide gene enhancer in B-cells inhibitor, zeta
211756_at	4.584	0.00283	0.01508	0	1.832	0.14097	1.6725	4434.51	7416.7	parathyroid hormone-like hormone /// parathyroid hormone-like hormone
205239_at	4.498	0.00416	0.01508	1e-05	1.038	0.35781	1.84539	751.488	1386.79	amphiregulin (schwannoma-derived growth factor)
225750_at	4.488	0.00432	0.01508	1e-05	2.98	0.04072	2.33399	1096.49	2559.2	ERO1-like (S. cerevisiae)
204166_at	4.486	0.00432	0.01508	1e-05	2.249	0.0877	2.24116	558.716	1252.17	---
213817_at	4.451	0.00503	0.01705	1e-05	3.192	0.03316	2.3748	1199.49	2848.54	CDNA FLJ13601 fis, clone PLACE1010069
202934_at	4.447	0.00507	0.01858	1e-05	3.277	0.03058	2.45795	1151.76	2830.96	hexokinase 2
219938_s_at	4.429	0.00544	0.01858	1e-05	5.9	0.00413	4.56248	204.354	932.361	proline-serine-threonine phosphatase interacting protein 2
225809_at	4.425	0.00549	0.01858	1e-05	3.634	0.02209	2.90582	454.771	1321.48	DKFZP564O0823 protein
208607_s_at	4.373	0.00691	0.01943	1e-05	2.562	0.06253	2.23853	4182.03	9361.58	serum amyloid A1 /// serum amyloid A1 /// serum amyloid A2 /// serum amyloid A2
205003_at	4.369	0.00697	0.01943	1e-05	1.874	0.13423	3.29964	52.4651	173.116	dedicator of cytokinesis 4
224739_at	4.367	0.00697	0.01943	1e-05	3.803	0.01905	2.23297	2451.91	5475.06	pim-3 oncogene
203108_at	4.358	0.00712	0.01943	1e-05	3.571	0.02336	1.86104	4693.39	8734.6	G protein-coupled receptor, family C, group 5, member A
205193_at	4.358	0.00712	0.01943	1e-05	5.783	0.00444	3.0504	386.702	1179.6	v-maf musculoaponeurotic fibrosarcoma oncogene homolog F (avian)
219630_at	4.35	0.00729	0.01943	1e-05	3.908	0.01743	3.35918	976.346	3279.72	membrane-associated protein 17
238567_at	4.288	0.00958	0.01964	2e-05	4.629	0.00981	2.62934	594.769	1563.85	sphingosine-1-phosphate phosphotase 2
227529_s_at	4.252	0.01112	0.01964	2e-05	1.577	0.18984	2.76621	176.335	487.779	A kinase (PRKA) anchor protein (gravin) 12
213572_s_at	4.25	0.01115	0.01964	2e-05	4.34	0.01226	1.60767	11069.5	17796.2	Serine (or cysteine) proteinase inhibitor, clade B (ovalbumin), member 1
210873_x_at	4.224	0.01233	0.01964	2e-05	1.999	0.11628	3.3907	71.6389	242.906	apolipoprotein B mRNA editing enzyme, catalytic polypeptide-like 3A
208170_s_at	4.222	0.01233	0.01964	2e-05	1.838	0.13989	8.22326	6.13556	50.4543	tripartite motif-containing 31
212977_at	4.221	0.01233	0.01964	2e-05	11.551	0.00032	1.89705	6842.11	12979.8	chemokine orphan receptor 1
235153_at	4.201	0.01323	0.01964	3e-05	7.013	0.00218	4.44016	65.753	291.954	hypothetical protein MGC4734
1554452_a_at	4.154	0.01613	0.01964	3e-05	8.371	0.00111	2.33925	1009.39	2361.21	hypoxia-inducible protein 2
205767_at	4.121	0.01839	0.0205	4e-05	2.889	0.04463	3.82716	90.6066	346.766	epiregulin
205466_s_at	4.119	0.01839	0.0205	4e-05	10.554	0.00046	1.93772	3821.29	7404.57	heparan sulfate (glucosamine) 3-O-sulfotransferase 1
209185_s_at	4.11	0.01899	0.0205	4e-05	2.533	0.06449	2.70165	800.735	2163.3	insulin receptor substrate 2
201169_s_at	4.079	0.02129	0.0205	5e-05	2.426	0.07227	1.87913	757.741	1423.89	basic helix-loop-helix domain containing, class B, 2
219727_at	4.039	0.02511	0.02372	5e-05	5.101	0.00698	2.62697	547.825	1439.12	dual oxidase 2
222646_s_at	4.023	0.02658	0.02497	6e-05	6.756	0.0025	2.14399	2986.24	6402.45	ERO1-like (S. cerevisiae)
205916_at	4.02	0.02675	0.02497	6e-05	10.721	0.00043	5.5339	7.1653	39.6521	S100 calcium binding protein A7 (psoriasin 1)
204224_s_at	4.017	0.02685	0.02497	6e-05	7.333	0.00184	2.50487	1037.29	2598.27	GTP cyclohydrolase 1 (dopa-responsive dystonia)
209037_s_at	4.007	0.02779	0.02497	6e-05	2.13	0.10021	2.10223	478.329	1005.56	EH-domain containing 1
212659_s_at	3.996	0.02858	0.02497	6e-05	1.632	0.178	1.80078	559.349	1007.26	interleukin 1 receptor antagonist
227405_s_at	3.983	0.03002	0.02497	7e-05	2.533	0.06447	2.32524	328.054	762.804	frizzled homolog 8 (Drosophila)
210854_x_at	3.968	0.03171	0.02497	7e-05	1.996	0.11666	2.22627	905.539	2015.97	solute carrier family 6 (neurotransmitter transporter, creatine), member 8
204420_at	3.966	0.03175	0.02497	7e-05	1.12	0.32557	3.13964	16.5479	51.9545	FOS-like antigen 1
1558549_s_at	3.948	0.03394	0.02497	8e-05	2.448	0.0706	3.8773	9.26836	35.9362	vanin 1
213796_at	3.908	0.0394	0.03049	9e-05	3.898	0.01757	2.9693	427.592	1269.65	small proline-rich protein 1A
206170_at	3.905	0.03956	0.03049	9e-05	6.999	0.00219	2.83307	628.289	1779.99	adrenergic, beta-2-, receptor, surface
235350_at	3.873	0.04483	0.03153	0.00011	8.387	0.00111	2.85993	270.082	772.414	Transcribed locus
228058_at	3.85	0.04899	0.03153	0.00012	2.368	0.07699	2.04501	1679.66	3434.92	similar to common salivary protein 1
239818_x_at	3.836	0.05146	0.03428	0.00013	1.783	0.14922	5.19367	3.94161	20.4714	---
220034_at	3.815	0.05552	0.03524	0.00014	3.052	0.03796	3.35953	93.0057	312.455	interleukin-1 receptor-associated kinase 3
201739_at	3.811	0.05614	0.03524	0.00014	5.982	0.00393	1.97318	4702.81	9279.48	serum/glucocorticoid regulated kinase
201329_s_at	3.794	0.05971	0.0385	0.00015	9.828	0.0006	2.18819	1405.68	3075.89	v-ets erythroblastosis virus E26 oncogene homolog 2 (avian)
224325_at	3.773	0.06425	0.0385	0.00016	1.898	0.13052	3.773	54.267	204.75	frizzled homolog 8 (Drosophila) /// frizzled homolog 8 (Drosphila)
213843_x_at	3.769	0.06481	0.0385	0.00016	1.932	0.12558	2.27706	892.512	2032.31	solute carrier family 6 (neurotransmitter transporter, creatine), member 8
223333_s_at	3.734	0.07365	0.03964	0.00019	5.049	0.00724	4.51128	6.13921	27.6957	angiopoietin-like 4
212657_s_at	3.727	0.07473	0.04045	0.00019	1.454	0.21974	1.49826	4164.53	6239.55	interleukin 1 receptor antagonist
1553055_a_at	3.726	0.07473	0.04045	0.00019	2.667	0.05596	2.24497	661.938	1486.03	hypothetical protein MGC19764
201531_at	3.725	0.07473	0.04045	0.0002	4.212	0.01356	2.13877	662.05	1415.97	zinc finger protein 36, C3H type, homolog (mouse)
221766_s_at	3.698	0.08242	0.04045	0.00022	4.614	0.00992	2.10674	1177.44	2480.56	family with sequence similarity 46, member A
215446_s_at	3.696	0.08247	0.04045	0.00022	5.803	0.00439	2.60146	339.302	882.683	lysyl oxidase
238017_at	3.694	0.08247	0.04045	0.00022	5.166	0.00667	2.11295	1772.72	3745.67	epidermal retinal dehydrogenase 2
212444_at	3.693	0.08247	0.04045	0.00022	3.05	0.03802	1.74489	2367.89	4131.7	CDNA clone IMAGE:6025865, partial cds
231067_s_at	3.683	0.08517	0.04152	0.00023	1.285	0.2681	2.79387	26.8282	74.9546	---
205729_at	3.664	0.09111	0.04361	0.00025	3.07	0.0373	2.79471	273.931	765.557	oncostatin M receptor
203125_x_at	3.661	0.09144	0.04361	0.00025	2.759	0.05089	2.52015	174.153	438.891	solute carrier family 11 (proton-coupled divalent metal ion transporters), member 2
212942_s_at	3.633	0.10158	0.04463	0.00028	1.451	0.2203	3.00505	14.2784	42.9073	KIAA1199
235252_at	3.624	0.10448	0.04694	0.00029	2.913	0.04356	2.76357	207.495	573.427	Kinase suppressor of ras
218880_at	3.619	0.10505	0.04737	0.0003	3.163	0.03409	2.68745	312.18	838.969	FOS-like antigen 2
221577_x_at	3.619	0.10505	0.04737	0.0003	2.61	0.0594	2.48134	2664.81	6612.29	growth differentiation factor 15
231779_at	3.616	0.10505	0.04737	0.0003	2.327	0.08055	3.08744	60.9221	188.094	interleukin-1 receptor-associated kinase 2
212171_x_at	3.616	0.10505	0.04737	0.0003	2.681	0.05519	2.12628	569.55	1211.02	vascular endothelial growth factor
220322_at	3.601	0.10989	0.04737	0.00032	5.295	0.00611	4.83702	65.7438	318.004	interleukin 1 family, member 9
225262_at	3.601	0.10989	0.04737	0.00032	3.418	0.02683	2.21922	1270.11	2818.66	FOS-like antigen 2
210355_at	3.572	0.12164	0.04737	0.00035	5.659	0.00481	1.77888	2847.38	5065.14	parathyroid hormone-like hormone
202479_s_at	3.555	0.12908	0.04801	0.00038	2.035	0.11155	2.64749	149.535	395.892	tribbles homolog 2 (Drosophila)
207196_s_at	3.55	0.13089	0.04801	0.00039	3.807	0.01898	1.78325	1620.31	2889.41	TNFAIP3 interacting protein 1
204863_s_at	3.542	0.13383	0.04834	0.0004	1.941	0.12417	1.92982	263.282	508.087	interleukin 6 signal transducer (gp130, oncostatin M rec
215812_s_at	3.533	0.13789	0.04834	0.00041	1.668	0.17072	1.97871	849.115	1680.16	solute carrier family 6 (neurotransmitter transporter, creatine), mamber 8 /// similar to sodium-and-chloride-dependent creatine transporter
228188_at	3.525	0.14095	0.04834	0.00042	4.942	0.00781	2.32048	898.028	2083.86	FOS-like antigen 2
1567107_s_at	3.519	0.14342	0.04925	0.00043	1.191	0.29934	1.49997	1271.99	1907.95	tropomyosin 3 /// tropomyosin 4
204493_at	3.495	0.15626	0.05373	0.00047	4.392	0.01176	2.10787	655.664	1382.05	BH3 interacting domain death agonist
202855_s_at	3.481	0.16364	0.0546	0.0005	1.625	0.17955	2.20715	1829	4036.88	solute carrier family 16 (monocarboxylic acid transporter), member 3
230499_at	3.465	0.17167	0.05864	0.00053	4.992	0.00753	4.71256	34.5974	163.042	Baculoviral IAP repeat-containing 3
210513_s_at	3.465	0.17167	0.05864	0.00053	3.607	0.02261	2.47711	154.203	381.979	vascular endothelial growth factor
202843_at	3.455	0.17606	0.05992	0.00055	2.543	0.06376	2.31232	404.925	936.318	ralA binding protein 1
220266_s_at	3.453	0.17606	0.05992	0.00055	3.587	0.02303	2.86292	142.758	408.704	Kruppel-like factor 4 (gut)
203060_s_at	3.453	0.17606	0.05992	0.00055	11.729	0.0003	3.90816	51.0566	199.538	3'-phosphoadenosine 5'-phosphosulfate synthase 2
209277_at	3.445	0.18043	0.06116	0.00057	1.807	0.14504	1.82243	1594.35	2905.59	tissue factor pathway inhibitor 2
203973_s_at	3.442	0.18048	0.06116	0.00058	11.068	0.00038	1.67182	6227.05	10410.5	CCAAT/enhancer binding protein (C/EBP), delta
222572_at	3.442	0.18048	0.06116	0.00058	2.446	0.07077	1.98874	2221.47	4417.93	protein phosphatase 2C, magnesium-dependent, catalytic subunit
224917_at	3.433	0.18537	0.06236	0.0006	1.831	0.14114	2.54697	302.515	770.496	likely ortholog of rat vacuole membrane protein 1
219232_s_at	3.431	0.18571	0.06236	0.0006	3.595	0.02286	3.19067	359.549	1147.2	egl nine homolog 3 (C. elegans)
218800_at	3.426	0.18825	0.06236	0.00061	1.696	0.16517	2.27988	870.627	1984.92	steroid 5 alpha-reductase 2-like
214385_s_at	3.42	0.19115	0.06312	0.00063	1.87	0.1349	7.40443	9.7146	71.9311	mucin 5, subtypes A and C, tracheobronchial/gastric
204597_x_at	3.397	0.20657	0.06717	0.00068	5.358	0.00585	4.30346	20.8391	89.6802	stanniocalcin 1
209012_at	3.386	0.21444	0.06899	0.00071	1.086	0.33851	2.3429	132.219	309.777	triple functional domain (PTPRF interacting)
224973_at	3.364	0.23077	0.07188	0.00077	5.943	0.00402	2.37719	328.823	781.673	family with sequence similarity 46, member A
203574_at	3.351	0.24049	0.07365	0.0008	1.922	0.12697	1.97418	703.913	1389.65	nuclear factor, interleukin 3 regulated
212143_s_at	3.344	0.24579	0.07433	0.00083	3.947	0.01686	1.38047	16588.3	22899.7	insulin-like growth factor binding protein 3
230543_at	3.309	0.27654	0.07566	0.00094	2.378	0.07616	4.47824	57.1097	255.751	Similar to Chloride intracellular channel protein 4 (Intracellular chloride channel protein p64H1)
202625_at	3.305	0.27911	0.07566	0.00095	3.959	0.0167	1.68232	2721.63	4578.65	V-yes-1 Yamaguchi sarcoma viral related oncogene homolog/// V-yes-1 Yamaguchi sarcoma viral related oncogene homolog
204907_s_at	3.287	0.29588	0.08137	0.00101	2.323	0.08085	3.05495	10.0948	30.8391	B-cell CLL/lymphoma 3
218182_s_at	3.274	0.30705	0.08137	0.00106	1.419	0.2288	1.48121	2749.59	4072.73	claudin 1
213680_at	3.274	0.30705	0.08137	0.00106	1.189	0.30034	2.93181	193.796	568.173	keratin 6B
200733_s_at	3.261	0.31931	0.08137	0.00111	2.076	0.10648	1.42061	9360.96	13298.3	protein tyrosine phosphatase type IVA, member 1
228726_at	3.241	0.34008	0.08378	0.00119	2.447	0.07068	1.56613	8012.81	12549.1	Serine (or cysteine) proteinase inhibitor, clade B (ovalbumin), member 1
204881_s_at	3.24	0.34008	0.08378	0.00119	9.003	0.00084	1.64161	4809.19	7894.84	UDP-glucose ceramide glucosyltransferase
1553589_a_at	3.239	0.34019	0.08378	0.0012	3.556	0.02367	3.003	558.426	1676.95	membrane-associated protein 17
227697_at	3.231	0.34748	0.08378	0.00123	3.551	0.02378	4.07027	24.5194	99.8005	suppressor of cytokine signaling 3
228325_at	3.223	0.35481	0.08596	0.00127	3.594	0.02288	2.69723	155.989	420.737	KIAA0146 protein
207388_s_at	3.222	0.35481	0.08596	0.00127	3.52	0.02445	2.00022	645.108	1290.36	prostaglandin E synthase
207367_at	3.217	0.35961	0.08753	0.0013	1.215	0.29127	1.38203	7895.98	10912.5	ATPase, H+/K+ transporting, nongastric, alpha polypeptide
223541_at	3.208	0.36919	0.0901	0.00134	1.168	0.30761	1.74843	1800.53	3148.1	hyaluronan synthase 3
216971_s_at	3.204	0.37231	0.09019	0.00136	1.334	0.25319	1.79456	325.645	584.39	plectin 1, intermediate filament binding protein 500kDa
221841_s_at	3.2	0.3751	0.09019	0.00137	4.748	0.00898	1.84949	1960.66	3626.22	Kruppel-like factor 4 (gut)
228648_at	3.198	0.3751	0.09027	0.00138	4.853	0.00832	2.12925	694.481	1478.72	leucine-rich alpha-2-glycoprotein 1
203404_at	3.198	0.3751	0.09027	0.00139	2.141	0.09901	2.14259	487.163	1043.79	armadillo repeat containing, X-linked 2
238649_at	3.186	0.3886	0.0923	0.00144	1.443	0.22247	3.49765	13.0987	45.8147	phosphatidylinositol transfer protein, cytoplasmic 1
215760_s_at	3.179	0.39579	0.0923	0.00148	1.758	0.15362	2.39741	174.92	419.356	---
217763_s_at	3.172	0.40332	0.09243	0.00151	4.866	0.00824	1.70505	1865.11	3180.09	RAB31, member RAS oncogene family
208937_s_at	3.169	0.40536	0.09243	0.00153	3.92	0.01725	1.28733	19169	24676.8	inhibitor of DNA binding 1, dominant negative helix-loop-helix protein
217762_s_at	3.167	0.40662	0.09243	0.00154	1.833	0.14066	1.56782	4774.41	7485.4	RAB31, member RAS oncogene family
204298_s_at	3.15	0.42767	0.0955	0.00163	3.366	0.02816	2.28902	298.377	682.991	lysyl oxidase
212268_at	3.146	0.4291	0.0955	0.00166	2.819	0.04786	1.55053	9217.7	14292.3	serine (or cysteine) proteinase inhibitor, clade B (ovalbumin), member 1
205501_at	3.14	0.43334	0.0955	0.00169	2.097	0.10399	3.35397	13.0999	43.9368	CDNA FLJ25677 fis, clone TST04054
201328_at	3.133	0.44113	0.0955	0.00173	6.767	0.00249	1.95197	2026.85	3956.35	v-ets erythroblastosis virus E26 oncogene homolog 2 (avian)
209803_s_at	3.132	0.44113	0.0955	0.00174	1.919	0.12735	1.38435	9630	13331.3	pleckstrin homology-like domain, family A, member 2
226621_at	3.131	0.44113	0.0955	0.00174	2.79	0.04934	1.88988	1209.85	2286.47	Microtubule associated serine/threonine kinase-like
213338_at	3.13	0.44113	0.0955	0.00175	0.706	0.51927	2.52161	10.6472	26.8481	Ras-induced senescence 1
202357_s_at	3.122	0.44974	0.0955	0.00179	2.21	0.09166	1.69685	5982.27	10151	B-factor, properdin
214070_s_at	3.12	0.44974	0.0955	0.00181	6.013	0.00385	1.86186	990.096	1843.42	ATPase, Class V, type 10B
218881_s_at	3.12	0.44974	0.0955	0.00181	3.019	0.03922	2.89116	28.1782	81.4677	FOS-like antigen 2
219450_at	3.112	0.45987	0.09597	0.00186	3.848	0.01834	2.48553	362.083	899.966	hypothetical protein FLJ11017
204285_s_at	3.107	0.46556	0.09688	0.00189	2.552	0.0632	1.89684	1411.36	2677.13	phorbol-12-myristate-13-acetate-induced protein 1
206686_at	3.105	0.46615	0.09688	0.0019	4.022	0.01584	3.03733	27.5427	83.6561	pyruvate dehydrogenase kinase, isoenzyme 1
202478_at	3.099	0.47329	0.0991	0.00194	1.681	0.1681	1.79311	689.686	1236.68	tribbles homolog 2 (Drosophila)
201041_s_at	3.097	0.47377	0.09955	0.00195	5.959	0.00398	1.4695	8221.66	12081.7	dual specificity phosphatase 1
227345_at	3.096	0.47377	0.09998	0.00196	1.706	0.16315	2.04375	488.816	999.016	tumor necrosis factor receptor superfamily, member 10d, decoy with truncated death domain
209546_s_at	3.095	0.47377	0.10084	0.00197	1.741	0.15666	1.6603	2805.59	4658.13	apolipoprotein L, 1
215672_s_at	3.092	0.47754	0.10084	0.00199	3.321	0.02935	5.53711	10.686	59.1696	KIAA0828 protein
226452_at	3.078	0.49785	0.10473	0.00209	1.646	0.17501	2.06663	194.333	401.615	pyruvate dehydrogenase kinase, isoenzyme 1
217764_s_at	3.055	0.53555	0.10627	0.00225	5.644	0.00485	1.60669	3009.79	4835.81	RAB31, member RAS oncogene family
214456_x_at	3.053	0.536	0.10627	0.00226	2.14	0.09907	1.67259	5214.56	8721.8	serum amyloid A1
206504_at	3.049	0.53861	0.10627	0.00229	2.303	0.08265	2.99994	167.035	501.095	cytochrome P450, family 24, subfamily A, polypeptide 1
201642_at	3.049	0.53861	0.10627	0.0023	2.841	0.0468	1.67158	1951.71	3262.44	interferon gamma receptor 2 (interferon gamma transducer 1)
213524_s_at	3.045	0.54268	0.10627	0.00233	2.779	0.04988	3.46236	486.628	1684.88	putative lymphocyte G0/G1 switch gene
226825_s_at	3.044	0.54268	0.10627	0.00233	3.402	0.02723	1.59593	4156.8	6633.97	TPA regulated locus
1557078_at	3.03	0.56418	0.10705	0.00244	2.076	0.10649	1.68664	948.911	1600.47	hypothetical protein MGC19764
205780_at	3.03	0.56418	0.10705	0.00245	6.819	0.00242	1.67519	2058.26	3447.98	BCL2-interacting killer (apoptosis-inducing)
216627_s_at	3.028	0.56643	0.10743	0.00247	0.909	0.41486	2.49495	154.792	386.2	UDP-Gal:betaGlcNAc beta 1,4- galactosyltransferase, polypeptide 1
224657_at	3.02	0.57896	0.10781	0.00253	2.262	0.08649	1.89949	1097.28	2084.26	mitogen-inducible gene 6
217678_at	3.012	0.58869	0.10804	0.00259	1.671	0.16998	3.41432	103.179	352.287	solute carrier family 7, (cationic amino acid transporter, y+ system) member 11
202388_at	3.007	0.59283	0.10804	0.00264	1.783	0.14911	1.7284	461.412	797.504	regulator of G-protein signalling 2, 24kDa
218507_at	3.006	0.59283	0.10804	0.00265	6.802	0.00244	2.282	600.718	1370.84	hypoxia-inducible protein 2
219825_at	3.005	0.59283	0.10841	0.00266	1.02	0.36557	3.31162	13.0071	43.0746	cytochrome P450, family 26, subfamily B, polypeptide 1
242944_at	3.002	0.59643	0.10914	0.00269	1.941	0.12419	1.80012	471.357	848.5	hypothetical protein MGC14128
213006_at	2.992	0.6104	0.10949	0.00277	4.538	0.01051	3.17827	24.9333	79.2446	CCAAT/enhancer binding protein (C/EBP), delta
1552931_a_at	2.984	0.62493	0.111	0.00285	2.509	0.06609	2.16413	128.429	277.938	phosphodiesterase 8A
226560_at	2.982	0.62582	0.111	0.00286	5.281	0.00617	1.75222	3032.89	5314.28	Sphingosine-1-phosphate phosphotase 2
209276_s_at	2.969	0.65	0.11608	0.00298	4.53	0.01058	1.57142	3982.31	6257.91	glutaredoxin (thioltransferase)
213043_s_at	2.967	0.65314	0.11641	0.00301	3.655	0.02168	2.43876	548.939	1338.73	thyroid hormone receptor associated protein 4
235857_at	2.963	0.65651	0.11783	0.00305	4.009	0.01601	1.7101	1398.21	2391.08	potassium channel tetramerisation domain containing 11
218976_at	2.963	0.65651	0.11783	0.00305	3.516	0.02453	2.04978	301.917	618.864	DnaJ (Hsp40) homolog, subfamily C, member 12
205157_s_at	2.956	0.66889	0.11815	0.00312	0.49	0.64968	1.11501	18527.7	20658.6	keratin 17
210095_s_at	2.947	0.68484	0.12029	0.00321	4.41	0.0116	1.24664	21652.6	26993	insulin-like growth factor binding protein 3
218273_s_at	2.945	0.68598	0.12029	0.00323	4.062	0.01533	2.4387	273.177	666.195	protein phosphatase 2C, magnesium-dependent, catalytic subunit
1554462_a_at	2.943	0.68598	0.12029	0.00325	4.285	0.01279	1.70736	1741.27	2972.98	DnaJ (Hsp40) homolog, subfamily B, member 9
213816_s_at	2.942	0.68598	0.12029	0.00326	2.24	0.08863	3.59059	34.6784	124.516	met proto-oncogene (hepatocyte growth factor receptor)
220187_at	2.941	0.68598	0.12029	0.00327	2.644	0.05736	1.82463	934.938	1705.92	tumor necrosis factor, alpha-induced protein 9
242727_at	2.941	0.68598	0.12029	0.00327	4.296	0.01268	2.634	68.3659	180.076	ADP-ribosylation factor-like 8
204595_s_at	2.937	0.69065	0.12029	0.00331	4.338	0.01228	3.42358	42.5141	145.55	stanniocalcin 1
222557_at	2.931	0.70204	0.12058	0.00338	1.687	0.16694	2.39076	36.3527	86.9107	stathmin-like 3
206391_at	2.923	0.71782	0.12163	0.00347	1.355	0.24682	1.44637	5215.73	7543.87	retinoic acid receptor responder (tazarotene induced) 1
213611_at	2.902	0.75891	0.12351	0.00371	1.424	0.2276	1.59023	974.367	1549.46	aquaporin 5
214303_x_at	2.901	0.75913	0.12351	0.00372	1.871	0.13475	7.98163	9.24148	73.7621	mucin 5, subtypes A and C, tracheobronchial/gastric
244780_at	2.9	0.75913	0.12379	0.00373	5.245	0.00632	1.8853	1098.52	2071.05	sphingosine-1-phosphate phosphotase 2
225366_at	2.897	0.76338	0.12434	0.00377	7.856	0.00142	1.88652	737.624	1391.54	phosphoglucomutase 2
202842_s_at	2.89	0.77794	0.12434	0.00386	4.749	0.00898	1.66425	1968.07	3275.36	DnaJ (Hsp40) homolog, subfamily B, member 9
214662_at	2.883	0.79297	0.12971	0.00394	1.055	0.35101	1.5596	327.031	510.038	WD repeat domain 43
204072_s_at	2.877	0.80303	0.13069	0.00401	1.856	0.13704	2.53419	86.3599	218.852	hypothetical protein CG003
203294_s_at	2.872	0.81486	0.13093	0.00408	1.71	0.16236	1.67817	430.536	722.515	lectin, mannose-binding, 1
204687_at	2.865	0.82923	0.13355	0.00417	4.454	0.01121	2.36454	171.66	405.897	DKFZP564O0823 protein
219155_at	2.861	0.83772	0.13355	0.00423	1.425	0.2274	1.49287	497.09	742.09	phosphatidylinositol transfer protein, cytoplasmic 1
218817_at	2.854	0.85001	0.13355	0.00432	3.04	0.03842	2.4297	145.427	353.345	signal peptidase complex subunit 3 homolog (S. cerevisiae)
1569022_a_at	2.854	0.85001	0.13355	0.00432	0.854	0.44121	1.8201	32.9762	60.0201	phosphoinositide-3-kinase, class 2, alpha polypeptide
210512_s_at	2.851	0.85001	0.13355	0.00435	3.354	0.02846	2.28746	1517.89	3472.13	vascular endothelial growth factor
221765_at	2.85	0.85001	0.13355	0.00437	6.946	0.00226	1.88745	1464.79	2764.71	UDP-glucose ceramide glucosyltransferase
225342_at	2.85	0.85001	0.13355	0.00437	3.177	0.03363	1.79441	1018.77	1828.1	Adenylate kinase 3
202856_s_at	2.842	0.86666	0.13749	0.00449	1.647	0.17499	1.94123	3371.01	6543.9	transmembrane protein 4
201042_at	2.839	0.87132	0.13749	0.00453	0.73	0.50603	1.3879	1196.92	1661.22	transglutaminase 2 (C polypeptide, protein-glutamine-gamma-glutamyltransferase)
201129_at	2.831	0.89043	0.13979	0.00464	1.479	0.21325	1.47633	1231.64	1818.31	splicing factor, arginine/serine-rich 7, 35kDa
205618_at	2.824	0.90325	0.1413	0.00474	3.979	0.01641	2.04842	275.954	565.271	proline rich Gla (G-carboxyglutamic acid) 1
224589_at	2.824	0.90325	0.1413	0.00474	0.324	0.76237	1.45644	44.4513	64.7405	---
222600_s_at	2.816	0.92131	0.1413	0.00486	1.017	0.3668	1.51307	511.73	774.281	hypothetical protein FLJ10808
201473_at	2.814	0.92131	0.1413	0.00489	5.368	0.00582	1.66452	1285.84	2140.31	jun B proto-oncogene
205349_at	2.813	0.92283	0.1413	0.00491	3.31	0.02964	1.65748	975.194	1616.36	guanine nucleotide binding protein (G protein), alpha 15 (Gq class)
212999_x_at	2.812	0.92283	0.1413	0.00493	1.115	0.32713	2.3446	567.596	1330.79	---
205321_at	2.809	0.92699	0.1413	0.00497	0.93	0.40499	1.30731	1298.78	1697.9	eukaryotic translation initiation factor 2, subunit 3 gamma, 52kDa
200650_s_at	2.805	0.93682	0.1413	0.00504	8.872	0.00089	1.27639	24196.7	30884.4	lactate dehydrogenase A
217173_s_at	2.797	0.9549	0.1413	0.00515	0.581	0.59244	1.43047	518.171	741.227	low density lipoprotein receptor (familial hypercholesterolemia
211936_at	2.795	0.95773	0.1413	0.00518	1.805	0.14539	1.2995	20116.1	26140.9	heat shock 70kDa protein 5 (glucose-regulated protein, 78kDa
227177_at	2.786	0.97563	0.1413	0.00534	3.773	0.01955	1.64144	1410.54	2315.32	Coronin, actin binding protein, 2A
218618_s_at	2.784	0.97563	0.1413	0.00536	2.26	0.08668	1.67388	1344.89	2251.19	fibronectin type III domain containing 3B
224797_at	2.783	0.97563	0.1413	0.00538	3.483	0.02529	1.47184	5451.7	8024	arrestin domain containing 3
225660_at	2.774	0.995	0.14204	0.00553	2.115	0.10191	2.25558	34.9801	78.9004	sema domain, transmembrane domain (TM), and cytoplasmic domain (semaphorin) 6A
210608_s_at	2.771	1	0.14204	0.00559	0.858	0.43919	1.39762	2441.26	3411.94	fucosyltransferase 2 (secretor status included)
220528_at	2.77	1	0.14204	0.0056	4.799	0.00866	3.57025	52.1566	186.212	vanin 3
227558_at	2.768	1	0.14204	0.00564	2.05	0.10969	1.55006	1381.56	2141.5	chromobox homolog 4 (Pc class homolog, Drosophila)
212906_at	2.765	1	0.14222	0.0057	1.695	0.1653	2.24046	207.941	465.882	KIAA1201 protein
209536_s_at	2.763	1	0.1424	0.00572	2.88	0.04502	1.57513	2652.16	4177.51	EH-domain containing 4
205538_at	2.755	1	0.14467	0.00586	1.409	0.2316	1.6006	766.194	1226.37	coronin, actin binding protein, 2A
209267_s_at	2.749	1	0.14675	0.00598	4.955	0.00773	3.60507	49.0032	176.66	solute carrier family 39 (zinc transporter), member 8
201884_at	2.74	1	0.15008	0.00615	2.989	0.04037	1.43677	5761.11	8277.39	carcinoembryonic antigen-related cell adhesion molecule 5
206392_s_at	2.736	1	0.1515	0.00622	1.112	0.3286	1.42299	7248.77	10315	retinoic acid receptor responder (tazarotene induced) 1
228487_s_at	2.725	1	0.1529	0.00643	1.633	0.17784	1.63956	741.2	1215.24	Ras responsive element binding protein 1
224967_at	2.723	1	0.15305	0.00646	4.417	0.01154	1.50276	6119.43	9196	UDP-glucose ceramide glucosyltransferase
212522_at	2.721	1	0.15382	0.00651	11.683	0.00031	1.73522	984.781	1708.81	phosphodiesterase 8A
204404_at	2.713	1	0.15956	0.00667	4.177	0.01396	1.93401	344.044	665.386	solute carrier family 12 (sodium/potassium/chloride transporters), member 2
236223_s_at	2.706	1	0.16002	0.00682	3.255	0.03122	1.85546	306.767	569.194	Transcribed locus
229074_at	2.697	1	0.16002	0.007	3.21	0.03259	1.61726	1505.08	2434.11	EH-domain containing 4
238551_at	2.69	1	0.16002	0.00714	6.632	0.00268	2.24071	175.145	392.451	fucosyltransferase 11 (alpha (1,3) fucosyltransferase)
219508_at	2.686	1	0.16002	0.00722	1.592	0.18659	1.39397	3866.68	5390.04	glucosaminyl (N-acetyl) transferase 3, mucin type
227438_at	2.685	1	0.16002	0.00725	3.945	0.01689	3.43859	31.3367	107.754	alpha-kinase 1
222493_s_at	2.683	1	0.16074	0.00731	1.055	0.35107	1.48626	195.795	291.002	testis expressed sequence 27
217787_s_at	2.68	1	0.16206	0.00736	2.023	0.1131	1.5379	1048.98	1613.22	UDP-N-acetyl-alpha-D-galactosamine:polypeptide N-acetylgalactosaminyl transferase 2 (GalNAc-T2)
202464_s_at	2.675	1	0.16361	0.00748	2.323	0.08084	1.58584	5284.53	8380.42	6-phosphofructo-2-kinase/fructose-2,6-biphosphatase 3
203963_at	2.674	1	0.16361	0.0075	2.165	0.0963	1.48635	2255.67	3352.71	carbonic anhydrase XII
206008_at	2.671	1	0.16361	0.00755	2.122	0.10109	2.26351	61.262	138.667	transglutaminase 1 (K polypeptide epidermal type I, protein-glutamine-gamma-glutamyltransferase)
202949_s_at	2.669	1	0.16361	0.00761	0.92	0.40966	1.32091	2955.43	3903.85	four and a half LIM domains 2
211905_s_at	2.667	1	0.16361	0.00766	0.915	0.41205	1.89346	51.2792	97.0952	integrin, beta 4
1563357_at	2.666	1	0.16361	0.00767	1.219	0.28978	2.25332	107.163	241.472	---
204818_at	2.664	1	0.16361	0.00772	2.351	0.07842	1.77855	744.888	1324.82	hydroxysteroid (17-beta) dehydrogenase 2
221009_s_at	2.656	1	0.16361	0.00791	3.747	0.02	4.15606	45.9802	191.097	angiopoietin-like 4
225583_at	2.656	1	0.16361	0.00792	2.695	0.05439	1.57076	1610.03	2528.96	UDP-glucuronate decarboxylase 1
226347_at	2.648	1	0.16547	0.00809	4.892	0.00809	1.81205	1409.69	2554.42	---
210735_s_at	2.643	1	0.16575	0.00821	2.313	0.08179	1.64449	1258.35	2069.34	carbonic anhydrase XII
205847_at	2.643	1	0.16575	0.00822	2.349	0.07859	1.5864	1062.64	1685.77	protease, serine, 22
211676_s_at	2.643	1	0.16575	0.00822	3.569	0.0234	1.82166	3874.67	7058.33	interferon gamma receptor 1 /// interferon gamma receptor 1
1553995_a_at	2.642	1	0.16585	0.00825	0.727	0.5076	2.0156	20.169	40.6528	5'-nucleotidase, ecto (CD73)
201939_at	2.638	1	0.16741	0.00833	1.257	0.27705	1.48111	2153.55	3189.64	polo-like kinase 2 (Drosophila)
203510_at	2.637	1	0.16741	0.00837	1.647	0.17481	1.39563	6919.48	9657.07	met proto-oncogene (hepatocyte growth factor receptor)
202241_at	2.637	1	0.16741	0.00837	2.373	0.07658	1.84449	768.311	1417.14	tribbles homolog 1 (Drosophila)
207096_at	2.632	1	0.16741	0.00848	1.534	0.19978	2.54594	621.032	1581.11	serum amyloid A4, constitutive
201564_s_at	2.63	1	0.16741	0.00854	0.697	0.52405	1.41204	958.357	1353.24	fascin homolog 1, actin-bundling protein (Strongylocentrotus purpuratus)
217995_at	2.63	1	0.16741	0.00855	6.376	0.0031	1.60154	2611.59	4182.56	sulfide quinone reductase-like (yeast)
206166_s_at	2.627	1	0.16741	0.0086	1.505	0.20669	1.43775	1304.48	1875.52	chloride channel, calcium activated, family member 2
217176_s_at	2.625	1	0.16741	0.00868	0.825	0.45579	1.7549	13.5556	23.7889	zinc finger protein, X-linked
1552612_at	2.624	1	0.16741	0.00869	1.292	0.26605	2.07151	157.943	327.182	---
202558_s_at	2.622	1	0.16741	0.00873	4.817	0.00854	2.0226	381.138	770.888	stress 70 protein chaperone, microsome-associated, 60kDa
230492_s_at	2.622	1	0.16741	0.00874	2.66	0.0564	1.69488	903.743	1531.74	hypothetical protein KIAA1434
209723_at	2.62	1	0.1675	0.00879	1.14	0.3179	3.04372	8.42764	25.6514	serine (or cysteine) proteinase inhibitor, clade B (ovalbumin), member 9
217996_at	2.616	1	0.16793	0.0089	0.852	0.44235	1.69146	964.009	1630.58	pleckstrin homology-like domain, family A, member 1
203788_s_at	2.615	1	0.16793	0.00893	1.477	0.21362	1.83993	369.841	680.483	sema domain, immunoglobulin domain (Ig), short basic domain, secreted, (semaphorin) 3C
227850_x_at	2.607	1	0.16793	0.00913	5.626	0.00491	1.6662	1886.87	3143.9	CDC42 effector protein (Rho GTPase binding) 5
207121_s_at	2.607	1	0.16793	0.00915	5.499	0.00533	1.43292	5627.2	8063.32	mitogen-activated protein kinase 6
218000_s_at	2.597	1	0.16813	0.0094	0.921	0.4091	2.82451	15.4792	43.7211	pleckstrin homology-like domain, family A, member 1
1556773_at	2.596	1	0.16813	0.00943	0.609	0.57526	1.26687	2981.91	3777.71	Parathyroid hormone-like hormone
226847_at	2.595	1	0.16813	0.00946	0.53	0.62447	1.50882	868.01	1309.67	follistatin
221690_s_at	2.593	1	0.16813	0.00952	0.669	0.54	1.51549	43.6383	66.1334	NACHT, leucine rich repeat and PYD containing 2
219229_at	2.592	1	0.16813	0.00954	2.384	0.07569	2.56546	15.4872	39.732	solute carrier organic anion transporter family, member 3A1
220655_at	2.589	1	0.16813	0.00962	2.063	0.10806	2.37157	7.89681	18.7278	TNFAIP3 interacting protein 3
224833_at	2.589	1	0.16813	0.00962	0.931	0.40458	1.40913	2277.15	3208.8	v-ets erythroblastosis virus E26 oncogene homolog 1 (avian)
203373_at	2.587	1	0.16821	0.00968	2.159	0.09696	2.79478	51.6781	144.429	suppressor of cytokine signaling 2
201201_at	2.585	1	0.16883	0.00975	4.528	0.0106	1.28395	17806.1	22862.2	cystatin B (stefin B)
218205_s_at	2.581	1	0.1705	0.00986	2.214	0.09126	1.43956	12192.5	17551.8	MAP kinase interacting serine/threonine kinase 2
204698_at	2.581	1	0.17058	0.00987	3.58	0.02317	1.67883	758.983	1274.21	interferon stimulated gene 20kDa
207076_s_at	2.575	1	0.17064	0.01003	1.465	0.21683	1.27001	6059.9	7696.11	argininosuccinate synthetase
201243_s_at	2.573	1	0.17064	0.01009	0.664	0.54276	1.2216	17809	21755.5	ATPase, Na+/K+ transporting, beta 1 polypeptide
205398_s_at	2.572	1	0.17064	0.01011	2.175	0.09529	1.74427	604.265	1054	SMAD, mothers against DPP homolog 3 (Drosophila)
220658_s_at	2.572	1	0.17064	0.01012	4.809	0.00859	1.96697	310.325	610.399	aryl hydrocarbon receptor nuclear translocator-like 2
242787_at	2.571	1	0.17064	0.01015	1.615	0.18155	2.16863	8.82668	19.1419	Inner centromere protein antigens 135/155kDa
224204_x_at	2.57	1	0.17064	0.01018	3.853	0.01825	2.39716	61.8303	148.217	aryl hydrocarbon receptor nuclear translocator-like 2
229566_at	2.569	1	0.17064	0.01019	5.189	0.00657	1.59674	3054.85	4877.8	hypothetical gene supported by AF086204
224826_at	2.567	1	0.17175	0.01026	1.941	0.12427	1.63885	1797.05	2945.09	hypothetical protein KIAA1434
201835_s_at	2.557	1	0.17601	0.01056	0.986	0.38012	1.47279	282.413	415.933	protein kinase, AMP-activated, beta 1 non-catalytic subunit
203828_s_at	2.556	1	0.17601	0.01058	5.084	0.00706	2.65107	26.6614	70.6811	interleukin 32 /// interleukin 32
209184_s_at	2.548	1	0.17762	0.01083	1.984	0.11819	2.18768	145.118	317.473	insulin receptor substrate 2
225033_at	2.538	1	0.18178	0.01115	1.014	0.3681	2.322	67.173	155.976	hypothetical protein LOC286167
212563_at	2.537	1	0.18182	0.01117	0.599	0.5815	1.51077	44.8991	67.8324	block of proliferation 1
214632_at	2.531	1	0.18394	0.01136	1.322	0.25668	2.11964	76.4581	162.063	neuropilin 2
243999_at	2.531	1	0.18394	0.01137	2.642	0.05749	1.62186	1206.74	1957.16	microtubule-associated protein 4
207602_at	2.528	1	0.1855	0.01146	2.769	0.05038	1.77523	363.224	644.805	airway trypsin-like protease
226077_at	2.524	1	0.18579	0.01161	2.747	0.05156	1.45823	10414.5	15186.7	hypothetical protein FLJ31951
222150_s_at	2.522	1	0.18579	0.01166	2.317	0.08139	2.99423	99.0339	296.53	hypothetical protein LOC54103
202609_at	2.52	1	0.18579	0.01173	4.563	0.01031	1.40904	5810.16	8186.77	epidermal growth factor receptor pathway substrate 8
213174_at	2.52	1	0.18579	0.01174	1.764	0.15255	1.56555	1154.07	1806.76	tetratricopeptide repeat domain 9
209126_x_at	2.517	1	0.18579	0.01182	1.385	0.23833	1.29045	7373.58	9515.26	keratin 6B
219869_s_at	2.512	1	0.18579	0.012	4.599	0.01004	3.23138	3.99644	12.914	solute carrier family 39 (zinc transporter), member 8
1552610_a_at	2.512	1	0.18579	0.01201	2.288	0.08401	1.45471	967.092	1406.84	Janus kinase 1 (a protein tyrosine kinase)
227897_at	2.511	1	0.18579	0.01204	4.221	0.01347	1.51328	1524.15	2306.47	---
238741_at	2.504	1	0.18734	0.01226	1.398	0.23456	1.6224	792.201	1285.26	hypothetical protein MGC14128
201242_s_at	2.504	1	0.18736	0.01228	4.386	0.01182	1.20748	29260	35330.8	ATPase, Na+/K+ transporting, beta 1 polypeptide
226535_at	2.502	1	0.1875	0.01237	1.254	0.27803	1.40454	2963.27	4162.04	---
202620_s_at	2.499	1	0.1875	0.01246	5.461	0.00547	1.67335	3308.89	5536.92	procollagen-lysine, 2-oxoglutarate 5-dioxygenase 2
206662_at	2.496	1	0.1875	0.01257	4.18	0.01392	1.40057	5092.71	7132.71	glutaredoxin (thioltransferase)
241990_at	2.495	1	0.1875	0.01258	3.709	0.02067	1.74915	1270.87	2222.95	ras homolog gene family, member V
202627_s_at	2.495	1	0.1875	0.0126	1.568	0.192	1.41346	817.252	1155.15	serine (or cysteine) proteinase inhibitor, clade E (nexin, plasminogen activator inhibitor type 1), member 1
206576_s_at	2.49	1	0.18801	0.01277	1.348	0.24887	1.69689	126.665	214.938	carcinoembryonic antigen-related cell adhesion molecule 1 (billiar glycoprotein)
219202_at	2.487	1	0.18852	0.0129	2.597	0.06026	2.1711	310.825	674.834	---
213667_at	2.484	1	0.18854	0.013	1.72	0.16046	1.74721	296.696	518.391	Snf2-related CBP activator protein
227068_at	2.482	1	0.18856	0.01306	2.935	0.04261	1.40895	2738.95	3859.04	phosphoglycerate kinase 1
202727_s_at	2.479	1	0.19099	0.01319	3.719	0.02049	1.58204	10147.2	16053.3	interferon gamma receptor 1
208925_at	2.474	1	0.19149	0.01336	3.138	0.0349	1.50633	2592.83	3905.66	chromosome 3 open reading frame 4
210935_s_at	2.469	1	0.19391	0.01356	1.788	0.14821	1.37976	3181.01	4389.02	WD repeat domain 1
211559_s_at	2.467	1	0.19393	0.01364	2.946	0.04212	1.80176	634.97	1144.06	cyclin G2
205680_at	2.466	1	0.19393	0.01367	0.659	0.54594	1.25047	9198.97	11503.1	matrix metalloproteinase 10 (stromelysin 2)
225367_at	2.461	1	0.19395	0.01384	5.254	0.00628	1.51012	4407.49	6655.84	phosphoglucomutase 2
206199_at	2.46	1	0.19395	0.0139	1.294	0.26538	2.39178	11.5228	27.5599	carcinoembryonic antigen-related cell adhesion molecule
205816_at	2.452	1	0.19727	0.01419	2.336	0.07973	2.24218	14.8673	33.3351	integrin, beta 8
219270_at	2.451	1	0.19727	0.01426	1.831	0.14108	2.39944	46.9358	112.619	hypothetical protein MGC4504
229440_at	2.449	1	0.19774	0.01433	2.837	0.047	1.67194	464.048	775.86	---
203936_s_at	2.449	1	0.19774	0.01433	0.75	0.49502	1.37471	4012.75	5516.36	matrix metalloproteinase 9 (gelatinase B, 92kDa gelatinase, 92kDA type IV collagenase)
206354_at	2.447	1	0.19774	0.01442	1.078	0.34174	2.54218	49.2909	125.306	solute carrier organic anion transporter family, member 1B3
202769_at	2.446	1	0.19774	0.01443	5.567	0.0051	1.49943	2903.7	4353.9	Cyclin G2
208309_s_at	2.446	1	0.19774	0.01444	2.308	0.08221	2.26501	12.5488	28.4232	mucosa associated lymphoid tissue lymphoma translocation gene 1
211725_s_at	2.444	1	0.19775	0.01452	2.814	0.0481	1.76658	768.353	1357.36	BH3 interacting domain death agonist /// BH3 interacting domain death agonist
243495_s_at	2.443	1	0.19775	0.01455	0.79	0.47398	1.44004	704.918	1015.11	RAB18, member RAS oncogene family
208502_s_at	2.442	1	0.19775	0.0146	1.099	0.3334	1.47466	616.933	909.768	paired-like homeodomain transcription factor 1
201037_at	2.441	1	0.19775	0.01467	1.128	0.32256	1.31956	3824.88	5047.15	phosphofructokinase, platelet
224314_s_at	2.44	1	0.19775	0.0147	2.913	0.04353	2.05503	135.92	279.319	egl nine homolog 1 (C. elegans)
203124_s_at	2.44	1	0.19821	0.0147	2.802	0.04871	1.45095	2435.71	3534.09	solute carrier family 11 (proton-coupled divalent metal ion transporters), member 2
212521_s_at	2.437	1	0.19866	0.01482	5.004	0.00747	1.86791	275.347	514.323	phosphodiesterase 8A
1566764_at	2.436	1	0.19866	0.01487	1.149	0.31456	1.41118	1215.88	1715.83	---
201123_s_at	2.435	1	0.19866	0.01488	0.664	0.54326	1.54547	2155.71	3331.58	eukaryotic translation initiation factor 5A
202770_s_at	2.435	1	0.19866	0.0149	8.104	0.00126	1.67389	1728.15	2892.73	cyclin G2
225097_at	2.431	1	0.20002	0.01506	2.814	0.04811	1.62456	565.567	918.797	Homeodomain interacting protein kinase 2
228057_at	2.43	1	0.20002	0.01508	2.396	0.07469	3.11935	9.35603	29.1848	DNA-damage-inducible transcript 4-like
214580_x_at	2.427	1	0.20182	0.0152	1.175	0.30513	1.21181	14532.4	17610.5	keratin 6A /// keratin 6B /// keratin 6C /// keratin 6E
224828_at	2.424	1	0.20403	0.01536	1.609	0.18289	1.67764	253.205	424.786	cytoplasmic polyadenylation element binding protein 4
225643_at	2.423	1	0.20403	0.01538	2.026	0.11268	1.40492	1105.24	1552.77	Chromosome 14 open reading frame 32
227676_at	2.42	1	0.20403	0.0155	1.938	0.1246	1.4549	2077.39	3022.4	family with sequence similarity 3, member D
211959_at	2.419	1	0.20403	0.01558	1.457	0.21889	1.53262	4689.29	7186.9	insulin-like growth factor binding protein 5
206724_at	2.416	1	0.20578	0.01571	2.04	0.11095	2.56252	10.8247	27.7385	chromobox homolog 4 (Pc class homolog, Drosophila)
203736_s_at	2.414	1	0.20578	0.01577	2.712	0.05343	2.45956	31.6717	77.8984	PTPRF interacting protein, binding protein 1 (liprin beta 1)
203934_at	2.409	1	0.20662	0.016	1.658	0.17266	3.56709	9.78136	34.891	kinase insert domain receptor (a type III receptor tyrosine kinase)
235324_at	2.409	1	0.20662	0.01601	0.599	0.5817	1.52098	47.0562	71.5717	Transcribed locus
1556834_at	2.406	1	0.20744	0.01612	2.212	0.09141	3.26702	17.4744	57.0893	CDNA clone IMAGE:5296106, partial cds
223199_at	2.406	1	0.20744	0.01614	0.934	0.40316	1.46754	2552.25	3745.55	MAP kinase interacting serine/threonine kinase 2
227143_s_at	2.405	1	0.20744	0.01616	4.993	0.00753	1.73475	664.153	1152.14	BH3 interacting domain death agonist
217528_at	2.398	1	0.21084	0.0165	1.989	0.11758	1.36927	2990.66	4095.01	chloride channel, calcium activated, family member 2
210367_s_at	2.396	1	0.21084	0.01658	4.845	0.00837	1.64951	1418.77	2340.27	prostaglandin E synthase
236449_at	2.395	1	0.21084	0.0166	2.371	0.07677	2.31715	99.049	229.512	Cystatin B (stefin B)
203821_at	2.393	1	0.21122	0.01669	1.568	0.19193	2.13035	314.65	670.315	heparin-binding EGF-like growth factor
206165_s_at	2.393	1	0.21122	0.01673	1.42	0.22852	1.29664	2045.48	2652.25	chloride channel, calcium activated, family member 2
1556499_s_at	2.391	1	0.2116	0.0168	1.162	0.30971	1.5042	366.517	551.313	collagen, type I, alpha 1
204924_at	2.39	1	0.2116	0.01687	4.163	0.01411	2.89243	155.5	449.773	toll-like receptor 2
204036_at	2.384	1	0.21501	0.01711	6.616	0.00271	1.70665	445.648	760.564	endothelial differentiation, lysophosphatidic acid G-protein-coupled receptor, 2
217356_s_at	2.382	1	0.21627	0.01724	3.275	0.03064	1.20365	17506.7	21072	phosphoglycerate kinase 1
224590_at	2.375	1	0.21876	0.01756	0.048	0.96398	1.08653	65.1284	70.7641	---
204864_s_at	2.371	1	0.21883	0.01773	1.388	0.23752	2.55663	25.8802	66.1662	interleukin 6 signal transducer (gp130, oncostatin M receptor)
235016_at	2.37	1	0.21883	0.01778	0.966	0.38855	1.35409	1451.18	1965.02	chromosome 10 open reading frame 74
210286_s_at	2.369	1	0.21883	0.01783	1.832	0.14083	2.33335	34.9509	81.5526	solute carrier family 4, sodium bicarbonate cotransporter, member 7
200731_s_at	2.367	1	0.21883	0.01792	2.69	0.05465	1.56327	1418.46	2217.45	protein tyrosine phosphatase type IVA, member 1
226817_at	2.366	1	0.21883	0.01797	1.41	0.23131	1.42666	465.918	664.705	desmocollin 2
214318_s_at	2.365	1	0.21963	0.01802	1.48	0.21308	1.97615	25.6708	50.7292	hypothetical protein CG003
204686_at	2.364	1	0.21995	0.01809	1.697	0.16487	1.64663	921.927	1518.07	insulin receptor substrate 1
200790_at	2.363	1	0.21995	0.01811	1.684	0.16746	1.40229	2026.4	2841.59	ornithine decarboxylase 1
212501_at	2.362	1	0.22033	0.01815	1.944	0.12385	1.3286	12996.4	17267	CCAAT/enhancer binding protein (C/EBP), beta
208616_s_at	2.354	1	0.22278	0.01858	3.491	0.02511	1.29811	10130.3	13150.3	protein tyrosine phosphatase type IVA, member 2
232591_s_at	2.348	1	0.22324	0.01889	2.94	0.04239	1.55374	1903.67	2957.81	transmembrane protein 30A
231899_at	2.345	1	0.22324	0.01902	3.18	0.03354	3.14635	173.797	546.825	KIAA1726 protein
226576_at	2.344	1	0.22324	0.01906	2.625	0.05849	2.32601	58.288	135.578	Rho GTPase activating protein 26
200730_s_at	2.344	1	0.22324	0.01906	2.155	0.09746	1.5195	3917.55	5952.73	protein tyrosine phosphatase type IVA, member 1
212473_s_at	2.343	1	0.22324	0.01911	1.667	0.17093	1.49883	1052.51	1577.53	flavoprotein oxidoreductase MICAL2
223085_at	2.342	1	0.2236	0.01917	1.964	0.12103	1.84937	838.583	1550.85	ring finger protein 19
224952_at	2.336	1	0.22466	0.01947	1.2	0.29636	1.42381	579.969	825.764	putative ankyrin-repeat containing protein
214282_at	2.335	1	0.22572	0.01956	2.792	0.04923	1.63616	797.3	1304.51	ceruloplasmin (ferroxidase)
1553514_a_at	2.333	1	0.22572	0.01967	3.694	0.02094	3.26301	39.6526	129.387	vanin 3
227964_at	2.332	1	0.22572	0.0197	2.114	0.10205	1.46703	2039.47	2991.95	FKSG44 gene
214073_at	2.322	1	0.2291	0.02025	1.12	0.32527	2.07323	32.4256	67.2255	cortactin
213135_at	2.32	1	0.23098	0.02034	0.685	0.53075	1.715	13.1166	22.4949	T-cell lymphoma invasion and metastasis 1
239586_at	2.316	1	0.23118	0.02055	1.713	0.16193	1.52184	1591.61	2422.19	hypothetical protein MGC14128
226743_at	2.314	1	0.23118	0.02068	1.355	0.24683	1.80655	145.008	261.964	hypothetical protein FLJ34922
208084_at	2.312	1	0.23203	0.0208	1.978	0.11901	2.02719	698.892	1416.79	integrin, beta 6
218804_at	2.309	1	0.23203	0.02095	0.775	0.48158	2.3858	19.4798	46.475	transmembrane protein 16A
238025_at	2.309	1	0.23203	0.02097	2.547	0.06351	1.98641	73.4871	145.975	mixed lineage kinase domain-like
222529_at	2.308	1	0.23203	0.02103	1.51	0.20566	1.49608	406.53	608.2	mitochondrial solute carrier protein
203233_at	2.302	1	0.23236	0.02134	2.204	0.09219	1.6686	480.586	801.907	interleukin 4 receptor
238692_at	2.299	1	0.23268	0.02148	0.813	0.46178	1.87011	97.8783	183.043	BTB (POZ) domain containing 11
201751_at	2.296	1	0.23535	0.0217	2.416	0.0731	1.67585	638.881	1070.67	KIAA0063 gene product
223264_at	2.293	1	0.23583	0.02183	1.671	0.17002	1.57327	1447.55	2277.39	mesoderm development candidate 1
229678_at	2.293	1	0.23583	0.02183	3.348	0.02863	2.35517	21.7406	51.2028	MRNA; cDNA DKFZp762K056 (from clone DKFZp762K056)
228846_at	2.292	1	0.23583	0.02188	4.123	0.01458	1.67698	355.669	596.449	MAX dimerization protein 1
220446_s_at	2.29	1	0.23685	0.02204	4.8	0.00865	2.01438	337.593	680.039	carbohydrate (N-acetylglucosamine 6-O) sulfotransferase 4
211527_x_at	2.289	1	0.23685	0.02207	2.773	0.05019	2.00092	127.638	255.394	vascular endothelial growth factor
200648_s_at	2.288	1	0.23793	0.02217	2.614	0.05919	1.24169	24975.3	31011.6	glutamate-ammonia ligase (glutamine synthase)
209499_x_at	2.281	1	0.24052	0.02256	4.263	0.01302	1.60477	582.756	935.189	tumor necrosis factor (ligand) superfamily, member 13 /// tumor necrosis factor (ligand superfamily, member 12-member 13)
205084_at	2.28	1	0.24052	0.0226	2.932	0.04272	1.55928	653.177	1018.48	B-cell receptor-associated protein 29
213113_s_at	2.28	1	0.24052	0.02262	3.218	0.03234	1.78033	411.984	733.466	solute carrier family 43, member 3
235561_at	2.278	1	0.24052	0.02274	0.548	0.6126	1.37485	51.4231	70.6991	Transcribed locus
227051_at	2.276	1	0.24052	0.02284	1.043	0.35583	1.5555	398.429	619.756	Homo sapiens, clone IMAGE:4393354, mRNA
201250_s_at	2.272	1	0.24052	0.02306	2.995	0.04013	1.7013	1175.59	2000.03	solute carrier family 2 (facilitated glucose transporter) member 1
1553132_a_at	2.272	1	0.24052	0.02307	9.357	0.00073	1.51876	2462.12	3739.38	membrane targeting (tandem) C2 domain containing 1
208891_at	2.27	1	0.24052	0.02318	0.889	0.42444	1.5603	2066.46	3224.29	dual specificity phosphatase 6
201167_x_at	2.266	1	0.24052	0.02344	0.768	0.48552	1.48201	306.895	454.821	Rho GDP dissociation inhibitor (GDI) alpha
204275_at	2.266	1	0.24052	0.02345	0.763	0.48821	1.78336	66.9168	119.337	small optic lobes homolog (Drosophila)
204286_s_at	2.264	1	0.24052	0.02354	1.983	0.11843	2.06242	335.923	692.813	phorbol-12-myristate-13-acetate-induced protein 1
202619_s_at	2.264	1	0.24052	0.02357	4.079	0.01512	1.74035	1285.73	2237.62	procollagen-lysine, 2-oxoglutarate 5-dioxygenase 2
227337_at	2.264	1	0.24052	0.02359	2.186	0.09406	1.45744	2819.77	4109.65	low density lipoprotein receptor-related protein binding protein
203616_at	2.263	1	0.24052	0.02364	1.689	0.16654	1.46431	2583.9	3783.62	polymerase (DNA directed), beta
206276_at	2.262	1	0.24082	0.02373	1.747	0.15561	1.62673	954.894	1553.36	lymphocyte antigen 6 complex, locus D
1555972_s_at	2.259	1	0.24185	0.02389	2.051	0.10951	1.71624	235.165	403.599	---
204725_s_at	2.256	1	0.24226	0.02408	2.709	0.05361	1.49021	2357.3	3512.86	NCK adaptor protein 1
201560_at	2.255	1	0.24226	0.0241	6.02	0.00384	1.59481	1988.51	3171.29	chloride intracellular channel 4
243444_at	2.255	1	0.24226	0.02415	3.03	0.03877	2.02395	509.742	1031.69	basonuclin 2
205397_x_at	2.254	1	0.24226	0.02418	1.604	0.18397	2.16058	173.581	375.036	SMAD, mothers against DPP homolog 3 (Drosophila)
206584_at	2.252	1	0.24254	0.02432	2.975	0.04096	2.38325	13.8107	32.9142	lymphocyte antigen 96
216010_x_at	2.249	1	0.24384	0.02454	2.208	0.09184	1.61497	638.454	1031.08	fucosyltransferase 3 (galactoside 3(4)-L-fucosyltransferase, Lewis blood group included)
239364_at	2.249	1	0.24384	0.02454	4.761	0.0089	2.03735	520.368	1060.17	---
1555565_s_at	2.246	1	0.24594	0.02469	1.386	0.23792	2.1666	153.244	332.018	TAP binding protein (tapasin)
209342_s_at	2.246	1	0.24659	0.02473	1.142	0.31721	1.83868	17.7322	32.6039	inhibitor of kappa light polypeptide gene enhancer in B-cells, kinase beta
222645_s_at	2.245	1	0.24659	0.02479	2.049	0.10984	1.56449	701.812	1097.98	potassium channel tetramerisation domain containing 5
218009_s_at	2.244	1	0.24659	0.02481	0.102	0.92387	1.09187	359.126	392.117	protein regulator of cytokinesis 1
221764_at	2.243	1	0.24659	0.02488	2.27	0.08577	1.54365	1042.65	1609.48	chromosome 19 open reading frame 22
212460_at	2.243	1	0.24659	0.02492	3.409	0.02705	1.62185	2061.5	3343.45	chromosome 14 open reading frame 147
217997_at	2.239	1	0.24902	0.02519	0.755	0.49213	2.40294	137.87	331.293	pleckstrin homology-like domain, family A, member 1
205263_at	2.231	1	0.25259	0.02567	5.508	0.0053	1.47897	3086.46	4564.78	B-cell CLL/lymphoma 10
222846_at	2.229	1	0.25259	0.0258	3.499	0.02491	3.35224	75.8098	254.133	RAB8B, member RAS oncogene family
212481_s_at	2.223	1	0.25428	0.02624	1.189	0.30011	1.46761	1297.85	1904.74	tropomyosin 4
210087_s_at	2.22	1	0.25443	0.02643	1.909	0.12886	1.58685	757.928	1202.72	myelin protein zero-like 1
204508_s_at	2.219	1	0.25443	0.02647	1.989	0.1176	1.64663	741.599	1221.14	carbonic anhydrase XII
210145_at	2.218	1	0.25469	0.02657	5.194	0.00654	1.93218	234.479	453.055	phospholipase A2, group IVA (cytosolic, calcium-dependent)
211317_s_at	2.213	1	0.2592	0.02689	2.802	0.04869	1.61474	667.237	1077.41	CASP8 and FADD-like apoptosis regulator
202364_at	2.212	1	0.25969	0.02694	2.961	0.0415	1.47144	1519.72	2236.18	MAX interactor 1 /// MAX interactor 1
225835_at	2.211	1	0.25993	0.02702	2.706	0.05374	1.44978	1684.57	2442.25	solute carrier family 12 (sodium/potassium/chloride transporters), member 2
233565_s_at	2.209	1	0.25995	0.02716	2.057	0.10888	1.71267	797.244	1365.41	syndecan binding protein (syntenin) 2
207279_s_at	2.209	1	0.25995	0.02718	1.115	0.3275	1.44824	184.944	267.843	nebulette
201110_s_at	2.209	1	0.25995	0.02718	0.127	0.90501	1.07289	2066.12	2216.72	thrombospondin 1
212468_at	2.2	1	0.26661	0.02779	1.307	0.26136	1.75006	44.3785	77.6653	sperm associated antigen 9
216602_s_at	2.195	1	0.26937	0.02815	1.617	0.18123	1.41827	838.157	1188.73	phenylalanine-tRNA synthetase-like, alpha subunit
224079_at	2.195	1	0.26937	0.02817	2.396	0.07472	2.22825	16.1732	36.0379	interleukin 17C
215243_s_at	2.195	1	0.26937	0.02819	1.514	0.2046	1.48934	950.666	1415.87	gap junction protein, beta 3, 31kDa (connexin 31)
201668_x_at	2.193	1	0.26981	0.02832	0.906	0.41623	1.75798	224.412	394.513	myristoylated alanine-rich protein kinase C substrate
225115_at	2.188	1	0.27073	0.02865	9.825	0.0006	1.82425	333.082	607.625	Homeodomain interacting protein kinase 2
205067_at	2.184	1	0.27405	0.02897	3.022	0.0391	2.8232	63.8527	180.269	interleukin 1, beta
210018_x_at	2.181	1	0.27584	0.02921	1.704	0.16367	2.15564	5.93109	12.7853	mucosa associated lymphoid tissue lymphoma translocation gene 1
219540_at	2.179	1	0.27605	0.02933	1.502	0.20751	1.35529	714.403	968.227	zinc finger protein 267
216252_x_at	2.177	1	0.27818	0.02948	3.151	0.0345	1.70696	239.568	408.933	Fas (TNF receptor superfamily, member 6)
201324_at	2.172	1	0.28181	0.02988	0.469	0.66378	1.17578	1782.42	2095.74	epithelial membrane protein 1
223278_at	2.171	1	0.28181	0.02994	1.299	0.26367	1.26901	15016.1	19055.6	gap junction protein, beta 2, 26kDa (connexin 26)
206332_s_at	2.17	1	0.28181	0.03002	4.002	0.0161	1.38998	6036.13	8390.1	interferon, gamma-inducible protein 16
209498_at	2.17	1	0.28181	0.03002	0.823	0.45689	1.83657	380.72	699.217	carcinoembryonic antigen-related cell adhesion molecule 1 (billiary glycoprotein)
202219_at	2.168	1	0.28181	0.03015	1.732	0.1584	1.73016	3553.82	6148.66	solute carrier family 6 (neurotransmitter transporter, creatine, member 8)
222546_s_at	2.167	1	0.28181	0.03026	0.799	0.4691	1.48992	36.2099	53.9501	EPS8-like 2
227184_at	2.166	1	0.28181	0.03034	5.078	0.00709	1.87683	500.661	939.658	Transcribed locus, weakly similar to NP_071385.1 chromosome 6 open reading frame 79 [Homo sapiens]
206714_at	2.165	1	0.282	0.03039	5.373	0.00579	3.06409	34.9432	107.069	arachidonate 15-lipoxygenase, second type
202351_at	2.162	1	0.2844	0.0306	1.605	0.18371	1.26003	6806.74	8576.68	integrin, alpha V (vitronectin receptor, alpha polypeptide, antigen CD51)
209101_at	2.161	1	0.28545	0.03071	1.03	0.36129	1.173	9426.77	11057.6	connective tissue growth factor
211689_s_at	2.157	1	0.28749	0.03104	2.074	0.10672	1.39862	818.112	1144.23	transmembrane protease, serine 2 /// transmembrane protease, serine 2
205997_at	2.153	1	0.28936	0.03135	1.31	0.26046	1.47664	1776.6	2623.4	a disintegrin and metalloproteinase domain 28
224209_s_at	2.152	1	0.28936	0.03136	0.875	0.43091	1.34528	2663.44	3583.07	guanine deaminase
234963_s_at	2.149	1	0.29007	0.03161	1.839	0.13974	2.22136	94.0014	208.811	fatty acid 2-hydroxylase
202975_s_at	2.148	1	0.29007	0.03168	0.342	0.74974	1.12467	1451.51	1632.47	Rho-related BTB domain containing 3
202147_s_at	2.144	1	0.29123	0.03206	2.117	0.10163	1.67395	463.199	775.371	interferon-related developmental regulator 1
201478_s_at	2.143	1	0.29174	0.03212	0.718	0.51267	1.25404	764.596	958.836	dyskeratosis congenita 1, dyskerin
202670_at	2.139	1	0.29241	0.0324	2.105	0.10307	1.39078	2830.76	3936.95	mitogen-activated protein kinase kinase 1
201044_x_at	2.137	1	0.29373	0.0326	3.132	0.03512	1.71264	373.823	640.225	dual specificity phosphatase 1
239486_at	2.135	1	0.29374	0.03273	3.441	0.02626	2.65408	117.921	312.973	Transcribed locus
210916_s_at	2.134	1	0.29374	0.03281	2.458	0.06987	1.86571	275.9	514.75	CD44 antigen (homing function and Indian blood group system)
222162_s_at	2.132	1	0.29472	0.03302	0.834	0.45137	1.53142	99.5884	152.512	a disintegrin-like and metalloprotease (reprolysin type) with thrombospondin type 1 motif, 1
204380_s_at	2.131	1	0.29472	0.0331	1.912	0.12848	1.87583	209.246	392.51	fibroblast growth factor receptor 3 (achondroplasia, thanatophoric dwarfism)
AFFX-M27830_5_at	2.127	1	0.29715	0.03342	3.002	0.03985	2.3983	114.788	275.297	SRY (sex determining region Y)-box 18
204971_at	2.126	1	0.29715	0.03351	2.038	0.11125	1.1288	22526.5	25428	cystatin A (stefin A)
226725_at	2.122	1	0.3002	0.03387	2.354	0.07814	1.50042	1541.84	2313.41	Transcribed locus
242271_at	2.119	1	0.3013	0.03405	2.822	0.04773	2.20056	7.65417	16.8435	solute carrier family 26, member 9
203123_s_at	2.115	1	0.30369	0.03445	3.667	0.02145	1.52767	1332.2	2035.15	solute carrier family 11 (proton-coupled divalent metal ion tranporters), member 2
206247_at	2.11	1	0.30526	0.03483	0.264	0.80476	1.43	61.0762	87.3388	MHC class I polypeptide-related sequence B
231775_at	2.11	1	0.30526	0.03485	1.841	0.13948	1.7945	603.788	1083.49	tumor necrosis factor receptor superfamily, member 10a
212814_at	2.104	1	0.30885	0.03536	9.504	0.00068	1.60577	750.694	1205.44	KIAA0828 protein
234725_s_at	2.103	1	0.30899	0.03543	0.885	0.42624	1.42308	1815.7	2583.88	sema domain, immunoglobulin domain (Ig), transmembrane domain TM and short cytoplasmic domain, (semaphorin) 4B
225142_at	2.101	1	0.31071	0.0356	2.815	0.04805	3.02628	35.0545	106.085	KIAA1718 protein
206108_s_at	2.1	1	0.31116	0.03569	0.447	0.67827	2.03521	49.7295	101.21	splicing factor, arginine/serine-rich 6
238846_at	2.098	1	0.31255	0.03592	2.434	0.07166	1.65715	266.183	441.106	Tumor necrosis factor receptor superfamily, member 11a, activator of NFKB
221748_s_at	2.091	1	0.31595	0.03654	2.689	0.05469	1.88426	551.838	1039.81	tensin /// tensin
208152_s_at	2.09	1	0.3167	0.03665	0.772	0.48314	1.26786	1530.77	1940.8	DEAD (Asp-Glu-Ala-Asp) box polypeptide 21 /// DEAD (Asp-Glu-Ala-Asp) box polypeptide 21
202941_at	2.089	1	0.31682	0.0367	6.358	0.00314	1.42048	6467.17	9186.49	NADH dehydrogenase (ubiquinone) flavoprotein 2, 24kDa
219256_s_at	2.086	1	0.3182	0.03696	1.998	0.11643	2.05091	11.9694	24.5481	SH3 domain and tetratricopeptide repeats 1
213750_at	2.082	1	0.3198	0.03737	1.087	0.3382	1.99166	125.067	249.09	Full length insert cDNA YH77E09
204693_at	2.081	1	0.3198	0.0374	1.492	0.2099	2.61771	79.5566	208.256	CDC42 effector protein (Rho GTPase binding) 1
219493_at	2.08	1	0.32035	0.03756	0.242	0.82099	1.26939	37.0632	47.0475	SHC SH2-domain binding protein 1
208966_x_at	2.079	1	0.32078	0.03765	2.11	0.10245	1.322	4805.18	6352.47	interferon, gamma-inducible protein 16
221881_s_at	2.076	1	0.32082	0.03792	3.573	0.02332	2.34653	270.207	634.049	chloride intracellular channel 4
212527_at	2.076	1	0.32082	0.03793	1.077	0.34219	1.31303	355.043	466.183	DNA segment, Chr 15, Wayne State University 75, expressed
1552516_a_at	2.072	1	0.32301	0.03827	2.879	0.04504	1.67256	163.534	273.519	homeodomain interacting protein kinase 1
235056_at	2.071	1	0.32301	0.03833	5.547	0.00517	1.67342	884.732	1480.53	ets variant gene 6 (TEL oncogene)
208965_s_at	2.071	1	0.32301	0.03834	5.037	0.0073	1.43682	1442.73	2072.94	interferon, gamma-inducible protein 16
206036_s_at	2.067	1	0.3252	0.03878	1.714	0.16166	1.58723	364.443	578.455	v-rel reticuloendotheliosis viral oncogene homolog (avian)
1554411_at	2.064	1	0.3252	0.039	1.374	0.24127	1.67535	544.371	912.012	catenin (cadherin-associated protein), beta 1, 88kDa
235234_at	2.064	1	0.3252	0.03905	1.244	0.28148	1.68224	187.965	316.202	hypothetical protein FLJ36874
228946_at	2.064	1	0.3252	0.03906	0.437	0.68473	1.27877	52.6847	67.3716	PDZ domain containing 6
210754_s_at	2.06	1	0.32904	0.03943	4.036	0.01566	1.62466	2177.35	3537.46	v-yes-1 Yamaguchi sarcoma viral related oncogene homolog
227253_at	2.058	1	0.32904	0.03958	1.564	0.19278	1.3261	8581.83	11380.4	Ceruloplasmin (ferroxidase)
201325_s_at	2.056	1	0.32965	0.03979	0.445	0.67905	1.20805	832.927	1006.22	epithelial membrane protein 1
228072_at	2.056	1	0.32965	0.03982	0.095	0.92868	1.05107	280.159	294.466	synaptotagmin XII
227139_s_at	2.052	1	0.33235	0.04016	1.304	0.26209	1.26368	1482.64	1873.59	Hermansky-Pudlak syndrome 3
1552627_a_at	2.049	1	0.33453	0.04043	2.094	0.10441	1.54642	566.508	876.061	Rho GTPase activating protein 5
238725_at	2.049	1	0.33523	0.04051	2.426	0.07231	1.68071	256.695	431.43	Transcribed locus, moderately similar to NP_055301.1 neuronal thread protein AD7c-NTP [Homo sapiens]
1562102_at	2.042	1	0.33817	0.04113	0.636	0.55948	2.36317	433.724	1024.96	Aldo-keto reductase family 1, member C2 (dihydrodiol dehydrogenase 2; bile acid binding protein; 3-alpha hydroxysterold dehydrogenase, type III)
202023_at	2.042	1	0.33817	0.04118	3.117	0.03564	1.47395	1686.11	2485.24	ephrin-A1
201749_at	2.042	1	0.33817	0.04119	2.096	0.1041	1.59428	383.364	611.19	Endothelin converting enzyme 1
200796_s_at	2.04	1	0.33857	0.04136	1.558	0.19416	1.64239	499.506	820.382	myeloid cell leukemia sequence 1 (BCL2-related)
204379_s_at	2.039	1	0.33857	0.04149	1.506	0.20665	1.4155	3589.78	5081.32	fibroblast growth factor receptor 3 (achondroplasia, thanatophoric dwarfism)
218796_at	2.037	1	0.33857	0.04162	8.048	0.00129	1.57477	715.646	1126.98	chromosome 20 open reading frame 42
225674_at	2.037	1	0.33857	0.04164	4.194	0.01377	1.60722	1237.15	1988.37	---
207345_at	2.037	1	0.33857	0.04169	0.327	0.75996	1.46203	52.4783	76.7248	follistatin
215867_x_at	2.036	1	0.33857	0.04171	2.945	0.04216	1.47377	1459.26	2150.62	carbonic anhydrase XII
201389_at	2.032	1	0.34313	0.04216	1.331	0.25414	1.54508	207.158	320.076	integrin, alpha 5 (fibronectin receptor, alpha polypeptide)
203627_at	2.031	1	0.3435	0.04229	3.517	0.02451	1.51245	596.2	901.72	Insulin-like growth factor 1 receptor
225368_at	2.02	1	0.35357	0.04341	1.595	0.18585	1.40374	4190.24	5882.01	Homeodomain interacting protein kinase 2
214404_x_at	2.017	1	0.35428	0.04369	2.615	0.05911	2.23378	195.597	436.92	SAM pointed domain containing ets transcription factor
222547_at	2.014	1	0.35585	0.044	1.414	0.23026	1.84162	240.828	443.514	mitogen-activated protein kinase kinase kinase kinase 4
222692_s_at	2.011	1	0.35632	0.04432	6.096	0.00366	1.70667	510.043	870.473	fibronectin type III domain containing 3B
218451_at	2.01	1	0.35632	0.04443	1.028	0.36214	1.38199	618.712	855.051	CUB domain-containing protein 1
203946_s_at	2.009	1	0.35643	0.04457	4.289	0.01276	1.73325	335.909	582.214	arginase, type II
201559_s_at	2.008	1	0.35643	0.04461	2.488	0.06763	2.01975	263.872	532.957	chloride intracellular channel 4
211599_x_at	2.007	1	0.35661	0.04475	2.427	0.07221	1.70162	805.128	1370.02	met proto-oncogene (hepatocyte growth factor receptor) /// met proto-oncogene (hepatocyte growth factor receptor)
206571_s_at	2.004	1	0.35661	0.04506	1.451	0.22034	1.39189	745.874	1038.17	mitogen-activated protein kinase kinase kinase kinase 4
222693_at	2.004	1	0.35661	0.0451	3.854	0.01824	1.63466	1192.5	1949.33	fibronectin type III domain containing 3B
48531_at	2.004	1	0.35661	0.04512	1.518	0.20353	1.35318	914.586	1237.6	TNFAIP3 interacting protein 2
232079_s_at	2.003	1	0.35661	0.04516	1.236	0.28397	1.46027	565.385	825.617	poliovirus receptor-related 2 (herpesvirus entry mediator B)
202375_at	2.002	1	0.35661	0.04523	3.263	0.03101	1.42813	1428.33	2039.83	SEC24 related gene family, member D (S. cerevisiae)
203665_at	2.002	1	0.35661	0.04524	1.722	0.16009	1.72968	5.01993	8.68288	heme oxygenase (decycling) 1
204549_at	2	1	0.3574	0.04545	2.935	0.04261	2.01482	68.7657	138.55	inhibitor of kappa light polypeptide gene enhancer in B-cells, kinase epsilon
204989_s_at	2	1	0.3574	0.04547	0.59	0.58684	1.26321	878.677	1109.96	integrin, beta 4
205868_s_at	2	1	0.3574	0.04548	2.423	0.07253	2.06274	76.753	158.322	protein tyrosine phosphatase, non-receptor type 11 (Noonan syndrome 1)
213508_at	1.999	1	0.35774	0.04557	6.31	0.00323	1.59687	607.362	969.88	chromosome 14 open reading frame 147
1555137_a_at	1.995	1	0.35943	0.04607	2.144	0.09866	1.96291	50.9753	100.06	FYVE, RhoGEF and PH domain containing 6
218095_s_at	1.993	1	0.35943	0.04622	2.654	0.05673	1.62096	5040.78	8170.92	TPA regulated locus
208892_s_at	1.993	1	0.35943	0.04623	0.737	0.50206	1.51256	1691.99	2559.24	dual specificity phosphatase 6
230659_at	1.993	1	0.35943	0.04625	2.015	0.11416	1.67654	112.397	188.439	---
206667_s_at	1.993	1	0.35943	0.0463	0.281	0.7926	1.08754	1059.13	1151.85	secretory carrier membrane protein 1
214164_x_at	1.993	1	0.35943	0.0463	3.472	0.02553	1.41155	1404.33	1982.28	carbonic anhydrase XII
228222_at	1.993	1	0.35943	0.04631	1.568	0.19191	1.16182	19226.5	22337.8	---
205289_at	1.993	1	0.35943	0.04631	2.377	0.07627	2.44587	117.164	286.567	bone morphogenetic protein 2
211885_x_at	1.992	1	0.35943	0.0464	2.86	0.04594	1.42024	546.147	775.659	fucosyltransferase 6 (alpha (1,3) fucosyltransferase)
223991_s_at	1.991	1	0.35943	0.04649	1.953	0.12247	1.6606	395.775	657.225	UDP-N-acetyl-alpha-D-galactosamine:polypeptide N-acetylgalactosaminyltransferase 2 (GalNAc-T2)
208425_s_at	1.99	1	0.35948	0.04658	2.317	0.08138	2.60413	24.8057	64.5973	putative ankyrin-repeat containing protein
225520_at	1.989	1	0.36008	0.04669	0.633	0.56093	1.43479	530.081	760.556	methylenetetrahydrofolate dehydrogenase (NADP+ dependent
205863_at	1.988	1	0.36068	0.04682	1.709	0.16256	3.67966	25.8589	95.1519	S100 calcium binding protein A12 (calgranulin C) /// S100 calcium binding protein A12 (calgranulin C)
232078_at	1.986	1	0.36088	0.04704	0.736	0.50266	1.41304	300.699	424.9	poliovirus receptor-related 2 (herpesvirus entry mediator B)
211002_s_at	1.986	1	0.36088	0.04707	1.394	0.23566	1.21389	4146.03	5032.82	tripartite motif-containing 29
218960_at	1.985	1	0.36147	0.04715	1.878	0.13366	1.26596	8268	10467	transmembrane protease, serine 4
217202_s_at	1.984	1	0.36261	0.04728	1.745	0.15596	1.30907	17853.6	23371.7	glutamate-ammonia ligase (glutamine synthase)
202554_s_at	1.982	1	0.3632	0.04752	0.197	0.85367	1.3484	44.8259	60.4432	glutathione S-transferase M3 (brain)
214398_s_at	1.981	1	0.36334	0.04758	7.301	0.00187	2.38653	21.841	52.1243	inhibitor of kappa light polypeptide gene enhancer in B-cells, kinase epsilon
209878_s_at	1.981	1	0.36334	0.0476	1.306	0.26144	1.77998	187.023	332.898	v-rel reticuloendotheliosis viral oncogene homolog A, nuclear factor of kappa light polypeptide gene enhancer in B-cells 3, p65 (avian)
209212_s_at	1.978	1	0.36555	0.04797	0.548	0.61282	1.13785	6126.95	6971.55	Kruppel-like factor 5 (intestinal)
202203_s_at	1.973	1	0.36879	0.0485	0.83	0.45344	1.23363	561.799	693.052	autocrine motility factor receptor
228812_at	1.972	1	0.36879	0.04861	4.676	0.00948	1.52416	762.73	1162.52	Transcribed locus, weakly similar to NP_689672.2 hypothetical protein MGC45438 [Homo sapiens]
217007_s_at	1.971	1	0.36879	0.04873	0.497	0.64496	1.18645	559.46	663.772	a disintegrin and metalloproteinase domain 15 (metargidin)
206291_at	1.97	1	0.36879	0.04882	0.679	0.53464	3.00502	28.693	86.2231	neurotensin
209435_s_at	1.969	1	0.36879	0.04897	1.355	0.24699	1.3078	526.798	688.944	rho/rac guanine nucleotide exchange factor (GEF) 2
218484_at	1.969	1	0.36879	0.04898	0.78	0.47909	1.84642	74.9926	138.468	NADH:ubiquinone oxidoreductase MLRQ subunit homolog
204348_s_at	1.966	1	0.37151	0.04928	2.565	0.06229	1.75892	1055.73	1856.94	adenylate kinase 3
222662_at	1.966	1	0.37154	0.04933	2.174	0.09542	2.12741	109.566	233.091	hypothetical protein LOC286044
210405_x_at	1.965	1	0.37201	0.04945	1.842	0.13935	1.7462	128.263	223.972	tumor necrosis factor receptor superfamily, member 10b
216244_at	1.964	1	0.37201	0.04952	1.848	0.13835	2.22719	34.1401	76.0364	interleukin 1 receptor antagonist
201195_s_at	1.963	1	0.37201	0.04961	0.564	0.60263	1.47951	694.284	1027.2	solute carrier family 7 (cationic amino acid transporter, y+ system), member 5
202531_at	1.963	1	0.37201	0.04965	1.978	0.11903	1.59789	523.604	836.661	interferon regulatory factor 1
202270_at	1.963	1	0.37201	0.04966	2.211	0.09149	1.60585	1226.4	1969.42	guanylate binding protein 1, interferon-inducible, 67kDa
222750_s_at	1.962	1	0.37231	0.04978	5.087	0.00704	1.45009	2535.19	3676.26	steroid 5 alpha-reductase 2-like/// guanylate binding protein 1, interferon-inducible, 67kDa

## Sheet: Down SMM 6hr vs PBS 6hr
probe.name	z.stat	fdr.BH	fdr.RE	z.pv	t.stat	t.pv	fc2power	mexpcon	mexptrt	gene.name
226961_at	-1.963	1	0.37201	0.04966	-2.669	0.05586	0.73898	8028.54	5932.94	hypothetical protein LOC222171
219768_at	-1.971	1	0.36879	0.04875	-1.652	0.17383	0.69663	1279.61	891.414	immune costimulatory protein B7-H4
209170_s_at	-1.981	1	0.36325	0.04754	-1.287	0.26747	0.48643	26.9123	13.0909	glycoprotein M6B
1553765_a_at	-1.986	1	0.36088	0.04708	-3.421	0.02677	0.48623	46.1536	22.4415	KIAA1900
204821_at	-1.987	1	0.36088	0.04694	-1.41	0.23139	0.65229	167.629	109.342	butyrophilin, subfamily 3, member A3
1568906_at	-1.991	1	0.35943	0.04651	-3.187	0.03331	0.54529	893.969	487.469	Homo sapiens, clone IMAGE:4820483, mRNA
214598_at	-1.991	1	0.35943	0.04643	-3.173	0.03375	0.58563	979.118	573.405	claudin 8
205990_s_at	-1.992	1	0.35943	0.04635	-0.813	0.46177	0.64102	381.36	244.459	wingless-type MMTV integration site family, member 5A
208935_s_at	-1.994	1	0.35943	0.04613	-3.115	0.03571	0.70494	3216.25	2267.28	lectin, galactoside-binding, soluble, 8 (galectin 8)
226822_at	-1.995	1	0.35943	0.04601	-1.432	0.22538	0.62477	286.713	179.129	hypothetical protein DKFZp762K222
219564_at	-1.998	1	0.35892	0.04576	-0.355	0.7405	0.78283	41.7383	32.6742	potassium inwardly-rectifying channel, subfamily J, member 16
225016_at	-2.002	1	0.35695	0.0453	-1.102	0.33236	0.53534	121.176	64.8706	adenomatosis polyposis coli down-regulated 1
212929_s_at	-2.003	1	0.35661	0.04514	-2.028	0.11252	0.71701	876.199	628.244	FLJ10824 protein /// similar to KIAA0592 protein
230093_at	-2.013	1	0.35591	0.04414	-3.267	0.03087	0.86905	24372.7	21181	testis specific A2 homolog (mouse)
215779_s_at	-2.014	1	0.35585	0.04402	-1.087	0.33804	0.55896	20.639	11.5365	histone 1, H2bg
228523_at	-2.018	1	0.35428	0.04361	-2.02	0.11351	0.53856	60.8321	32.7617	nanos homolog 1 (Drosophila)
1556012_at	-2.02	1	0.35292	0.04335	-1.938	0.12464	0.5858	527.449	308.977	Hypothetical protein FLJ38753
203895_at	-2.034	1	0.34071	0.04197	-1.701	0.16414	0.74298	1286.5	955.836	phospholipase C, beta 4
1568249_at	-2.037	1	0.33857	0.04168	-1.14	0.31801	0.59164	901.404	533.308	Hypothetical LOC388796
229878_at	-2.038	1	0.33857	0.04153	-1.643	0.17576	0.56323	194.013	109.275	KIAA1731 protein
240344_x_at	-2.051	1	0.33235	0.04024	-1.505	0.20668	0.69548	959.612	667.389	CDNA FLJ32429 fis, clone SKMUS2001014
214769_at	-2.054	1	0.33065	0.03996	-1.373	0.24174	0.54972	55.7985	30.6737	Chloride channel 4
220344_at	-2.057	1	0.32965	0.03972	-1.625	0.17944	0.60123	1344.23	808.196	chromosome 11 open reading frame 16
202363_at	-2.069	1	0.32476	0.03859	-0.243	0.8196	0.91309	491.315	448.614	sparc/osteonectin, cwcv and kazal-like domains proteoglycan (testican)
225775_at	-2.069	1	0.32476	0.03854	-1.199	0.29661	0.5595	177.618	99.3769	hypothetical protein MGC50844
210176_at	-2.076	1	0.32082	0.03789	-1.836	0.14032	0.63081	268.364	169.286	toll-like receptor 1
209351_at	-2.08	1	0.32035	0.03754	-0.283	0.7913	0.91349	9779.52	8933.49	keratin 14 (epidermolysis bullosa simplex, Dowling-Meara, Koebner)
228346_at	-2.081	1	0.3198	0.03739	-0.849	0.44386	0.63474	61.1372	38.8063	Transcribed locus, moderately similar to NP_055301.1 neuronal thread protein AD7c-NTP [Homo sapiens]
210962_s_at	-2.093	1	0.3155	0.03636	-2.452	0.0703	0.73048	2250.15	1643.69	A kinase (PRKA) anchor protein (yotiao) 9
1554072_s_at	-2.105	1	0.30808	0.03528	-0.918	0.41035	0.69156	477.938	330.522	hypothetical protein FLJ25393
226649_at	-2.108	1	0.3054	0.03502	-1.552	0.19553	0.56463	245.876	138.829	pantothenate kinase 1
205022_s_at	-2.118	1	0.3013	0.03419	-2.751	0.05133	0.6186	656.787	406.288	checkpoint suppressor 1
239430_at	-2.119	1	0.3013	0.03413	-1.18	0.30338	0.61913	1121.32	694.248	insulin growth factor-like family member 1
218540_at	-2.126	1	0.29715	0.03352	-1.522	0.20277	0.68933	325.852	224.618	thiamine triphosphatase
226018_at	-2.126	1	0.29715	0.03349	-1.837	0.14011	0.63293	582.333	368.576	hypothetical protein Ells1
226833_at	-2.128	1	0.29651	0.03333	-3.666	0.02146	0.62763	1078.81	677.1	hypothetical protein FLJ32499
1555878_at	-2.137	1	0.29373	0.03261	-0.41	0.70313	0.79534	25.5534	20.3238	Ribosomal protein S24
203151_at	-2.14	1	0.29241	0.03235	-1.408	0.23198	0.69348	947.172	656.848	microtubule-associated protein 1A
212281_s_at	-2.148	1	0.29007	0.03174	-1.064	0.34719	0.52774	561.006	296.068	hypothetical protein MAC30
211494_s_at	-2.15	1	0.29007	0.03158	-0.807	0.46492	0.66668	32.7854	21.8573	solute carrier family 4, sodium bicarbonate cotransporter, member 4
229095_s_at	-2.153	1	0.28936	0.03135	-1.605	0.18382	0.52844	422.988	223.522	Hypothetical protein LOC339692
236325_at	-2.157	1	0.28749	0.03099	-2.382	0.07579	0.6607	810.265	535.339	---
226806_s_at	-2.161	1	0.28545	0.03069	-2.549	0.06338	0.58253	685.008	399.037	Full length insert cDNA clone ZD69D05
227266_s_at	-2.162	1	0.2844	0.03059	-0.51	0.63669	0.70839	78.017	55.2664	FYN binding protein (FYB-120/130)
209442_x_at	-2.172	1	0.28181	0.02988	-1.352	0.24784	0.72744	594.246	432.278	ankyrin 3, node of Ranvier (ankyrin G)
235152_at	-2.177	1	0.27818	0.0295	-1.128	0.32225	0.60987	59.9941	36.5886	Homo sapiens, clone IMAGE:5218412, mRNA
218974_at	-2.181	1	0.27495	0.02915	-3.125	0.03537	0.49674	469.21	233.078	Hypothetical protein FLJ10159
214870_x_at	-2.192	1	0.26981	0.02836	-1.07	0.34478	0.75395	1510.86	1139.12	nuclear pore complex interacting protein /// hypothetical protein LOC 339047 /// similar to hypothetical protein LOC339047
212686_at	-2.202	1	0.26463	0.02763	-3.633	0.0221	0.70547	2743.02	1935.12	protein phosphatase 1H (PP2C domain containing)
207935_s_at	-2.207	1	0.26089	0.0273	-0.273	0.79873	0.87674	13960.7	12239.9	keratin 13
211038_s_at	-2.212	1	0.25969	0.02697	-0.208	0.84528	0.73093	405.291	296.238	hypothetical protein MGC12760 /// hypothetical protein MGC12760
228268_at	-2.229	1	0.25259	0.02582	-0.809	0.46363	0.6632	38.6306	25.6197	Flavin containing monooxygenase 2
237020_at	-2.231	1	0.25259	0.0257	-0.817	0.45973	0.76166	1321.54	1006.56	hypothetical protein MGC39581
223339_at	-2.265	1	0.24052	0.02351	-1.34	0.25119	0.64986	271.012	176.121	ATPase inhibitory factor 1
213248_at	-2.267	1	0.24052	0.02341	-3.149	0.03454	0.40397	194.485	78.5658	hypothetical protein LOC221362
213891_s_at	-2.268	1	0.24052	0.0233	-1.255	0.27779	0.65195	505.207	329.372	Transcription factor 4
204538_x_at	-2.275	1	0.24052	0.02292	-1.164	0.30904	0.69263	937.255	649.173	nuclear pore complex interacting protein
203153_at	-2.278	1	0.24052	0.02274	-2.482	0.06805	0.49297	198.361	97.7859	interferon-induced protein with tetratricopeptide repeats 1 /// interferon-induced protein with tetratricopeptide repeats 1
232541_at	-2.28	1	0.24052	0.02261	-0.234	0.82682	0.85314	13.5874	11.592	Epidermal growth factor receptor (erythroblastic leukemia viral (v-erb-b) oncogene homolog, avian)
239098_at	-2.293	1	0.23583	0.02186	-3.699	0.02086	0.6712	3672.28	2464.83	potassium channel regulator
234989_at	-2.306	1	0.23203	0.02112	-0.171	0.87219	0.763	299.163	228.26	trophoblast-derived noncoding RNA
207275_s_at	-2.314	1	0.23118	0.02066	-0.853	0.44181	0.75173	1082.51	813.751	acyl-CoA synthetase long-chain family member 1
212510_at	-2.317	1	0.23098	0.02049	-6.458	0.00296	0.6037	1240.88	749.123	glycerol-3-phosphate dehydrogenase 1-like
240288_at	-2.324	1	0.2291	0.02011	-2.888	0.04464	0.69977	4029.02	2819.39	potassium channel regulator
222760_at	-2.327	1	0.22762	0.01995	-1.175	0.30518	0.61365	428.197	262.764	hypothetical protein FLJ14299
227525_at	-2.328	1	0.22762	0.01994	-3.68	0.0212	0.49753	634.63	315.747	glucocorticoid induced transcript 1
204897_at	-2.339	1	0.22431	0.01932	-1.363	0.24453	0.60397	338.387	204.377	prostaglandin E receptor 4 (subtype EP4)
206243_at	-2.341	1	0.22396	0.01925	-1.698	0.16468	0.52662	526.605	277.32	tissue inhibitor of metalloproteinase 4
205267_at	-2.343	1	0.22324	0.01911	-0.707	0.51831	0.64557	38.518	24.8663	POU domain, class 2, associating factor 1
214180_at	-2.343	1	0.22324	0.01911	-1.284	0.26848	0.62102	322.963	200.566	Mannosidase, alpha, class 1C, member 1
206262_at	-2.367	1	0.21883	0.01792	-1.428	0.22644	0.38009	496.414	188.683	alcohol dehydrogenase 1C (class I), gamma polypeptide
209121_x_at	-2.369	1	0.21883	0.01785	-1.731	0.15848	0.70532	1410.1	994.571	nuclear receptor subfamily 2, group F, member 2
225627_s_at	-2.373	1	0.21883	0.01767	-3.468	0.02563	0.55759	672.398	374.921	KIAA1573 protein
215729_s_at	-2.376	1	0.21876	0.01749	-1.417	0.22954	0.49887	271.786	135.585	vestigial like 1 (Drosophila)
205288_at	-2.397	1	0.21084	0.01652	-1.889	0.1319	0.6857	1117.29	766.134	CDC14 cell division cycle 14 homolog A (S. cerevisiae)
1552389_at	-2.407	1	0.20662	0.01608	-3.452	0.026	0.52408	1029.04	539.3	hypothetical protein FLJ39553
1558431_at	-2.47	1	0.1939	0.0135	-1.835	0.14045	0.52026	246.803	128.402	hypothetical protein FLJ36208
227758_at	-2.51	1	0.18582	0.01207	-2.37	0.07679	0.42116	94.6489	39.8622	RAS-like, estrogen-regulated, growth inhibitor
235264_at	-2.52	1	0.18579	0.01172	-1.336	0.25244	0.71744	1086.19	779.273	Transcribed locus
227949_at	-2.572	1	0.17064	0.01011	-1.353	0.24758	0.40969	18.6291	7.63209	phosphatase and actin regulator 3
238069_at	-2.595	1	0.16813	0.00946	-0.756	0.49184	0.51959	29.4481	15.301	Transcribed locus, strongly similar to XP_527459.1 similar to chromosome 6 open reading frame 111; SR rich protein [Pan troglodytes]
1569582_at	-2.602	1	0.16801	0.00927	-2.547	0.06348	0.41084	170.741	70.1474	similar to esterase/N-deacetylase (EC 3.5.1.-), 50K hepatic - rabbit
219274_at	-2.611	1	0.16793	0.00904	-1.308	0.26086	0.71081	1844.52	1311.1	transmembrane 4 superfamily member 12
221501_x_at	-2.689	1	0.16002	0.00716	-1.055	0.35103	0.7205	1447.47	1042.91	hypothetical protein LOC339047
228167_at	-2.696	1	0.16002	0.00702	-2.016	0.11405	0.66401	1751.4	1162.95	kelch-like 6 (Drosophila)
205259_at	-2.702	1	0.16002	0.0069	-2.463	0.0695	0.54339	860.839	467.775	nuclear receptor subfamily 3, group C, member 2
211596_s_at	-2.704	1	0.16002	0.00685	-2.107	0.10287	0.58295	1978.02	1153.08	leucine-rich repeats and immunoglobulin-like domains 1 /// leucine-rich repeats and immunoglobulin-like domains 1
1558333_at	-2.761	1	0.14258	0.00576	-6.57	0.00278	0.32553	206.036	67.0715	chromosome 22 open reading frame 15
232481_s_at	-2.781	0.97711	0.1413	0.00541	-1.477	0.21374	0.68459	851.55	582.965	SLIT and NTRK-like family, member 6
224566_at	-2.783	0.97563	0.1413	0.00539	-0.385	0.71977	0.79652	701.994	559.153	trophoblast-derived noncoding RNA
227943_at	-2.787	0.9755	0.1413	0.00532	-2.139	0.09917	0.45726	380.011	173.765	---
219870_at	-2.791	0.96592	0.1413	0.00525	-4.721	0.00916	0.26685	317.263	84.6619	activating transcription factor 7 interacting protein 2
222494_at	-2.815	0.92131	0.1413	0.00487	-3.302	0.02988	0.59708	1259.3	751.91	checkpoint suppressor 1
1554547_at	-2.848	0.85271	0.13355	0.0044	-2.445	0.07085	0.30229	85.3996	25.8156	family with sequence similarity 13, member C1
206693_at	-2.91	0.74285	0.12351	0.00361	-0.983	0.38141	0.63827	872.913	557.151	interleukin 7
1554018_at	-2.918	0.72668	0.12267	0.00352	-1.108	0.32988	0.45432	67.2386	30.5477	glycoprotein (transmembrane) nmb
229975_at	-3.001	0.59643	0.10914	0.00269	-3.124	0.03537	0.55938	1325.39	741.395	Transcribed locus
218858_at	-3.01	0.59079	0.10804	0.00261	-5.056	0.0072	0.40256	727.01	292.667	DEP domain containing 6
205363_at	-3.017	0.58125	0.10804	0.00255	-1.387	0.23782	0.66201	1168.15	773.323	butyrobetaine (gamma), 2-oxoglutarate dioxygenase (gamma-butyrobetaine hydroxylase) 1
218918_at	-3.14	0.43334	0.0955	0.00169	-1.038	0.35795	0.64022	928.831	594.654	mannosidase, alpha, class 1C, member 1
219195_at	-3.146	0.4291	0.0955	0.00166	-4.2	0.01369	0.40993	649.526	266.258	peroxisome proliferative activated receptor, gamma, coactivator 1, alpha
210387_at	-3.166	0.40662	0.09243	0.00155	-1.095	0.33506	0.4976	432.962	215.442	histone 1, H2bg
218031_s_at	-3.765	0.06545	0.0385	0.00017	-2.255	0.08714	0.43725	591.578	258.669	checkpoint suppressor 1
228113_at	-3.922	0.03746	0.03049	9e-05	-6.767	0.00249	0.22783	328.804	74.9119	RAB37, member RAS oncogene family
229623_at	-3.998	0.02858	0.02497	6e-05	-1.872	0.13458	0.3802	337.306	128.244	Similar to hypothetical protein LOC231503
224565_at	-4.103	0.01941	0.0205	4e-05	-0.545	0.61497	0.75353	2473.01	1863.49	trophoblast-derived noncoding RNA
206149_at	-4.205	0.01312	0.01964	3e-05	-0.772	0.48334	0.42977	518.342	222.769	hepatocellular carcinoma antigen gene 520
1555097_a_at	-4.556	0.0032	0.01508	1e-05	-24.908	2e-05	0.13855	136.571	18.9225	prostaglandin F receptor (FP)
207177_at	-4.692	0.00172	0.01508	0	-8.794	0.00092	0.14283	103.165	14.735	prostaglandin F receptor (FP)
212094_at	-5.208	0.00016	0.01239	0	-0.996	0.37549	0.38016	248.297	94.393	paternally expressed 10

## Sheet: Up SMM 24 hr vs PBS 24hr
probe.name	z.stat	fdr.BH	fdr.RE	z.pv	t.stat	t.pv	fc2power	mexpcon	mexptrt	gene.name
206529_x_at	17.795	0	0	0	6.842	0.00102	125.039	25.8585	3233.31	solute carrier family 26, member 4
207356_at	16.544	0	0	0	15.892	2e-05	79.4748	77.8386	6186.2	defensin, beta 4
202376_at	13.231	0	0	0	3.646	0.01482	6.66207	2146.57	14300.6	serine (or cysteine) proteinase inhibitor, clade A (alpha-1 antiproteinase, antitrypsin), member 3
203691_at	11.933	0	0	0	3.865	0.01182	7.67886	879.576	6754.14	protease inhibitor 3, skin-derived (SKALP) /// protease inhibitor 3, skin-derived (SKALP)
208607_s_at	11.893	0	0	0	4.243	0.00815	5.50793	3815.41	21015	serum amyloid A1 /// serum amyloid A1 /// serum amyloid A2 /// serum amyloid A2
214974_x_at	11.821	0	0	0	6.397	0.00138	50.9671	17.6684	900.505	chemokine (C-X-C motif) ligand 5
213796_at	11.355	0	0	0	3.506	0.01717	36.8109	27.1587	999.739	small proline-rich protein 1A
41469_at	11.193	0	0	0	3.611	0.01536	6.79139	943.407	6407.05	protease inhibitor 3, skin-derived (SKALP)
205476_at	10.321	0	0	0	2.156	0.08365	5.04031	5581.45	28132.3	chemokine (C-C motif) ligand 20
205328_at	10.311	0	0	0	4.014	0.01018	9.77817	265.635	2597.42	claudin 10
1554997_a_at	9.889	0	0	0	2.734	0.04111	14.3763	44.1475	634.677	prostaglandin-endoperoxide synthase 2 (prostaglandin G/H synthase and cyclooxygenase)
215223_s_at	9.481	0	0	0	9.709	0.0002	7.34723	592.434	4352.74	superoxide dismutase 2, mitochondrial
207850_at	9.338	0	0	0	4.664	0.00551	9.50109	314.839	2991.32	chemokine (C-X-C motif) ligand 3
223484_at	9.211	0	0	0	4.867	0.00461	3.12407	6762.34	21126.1	normal mucosa of esophagus specific 1
206392_s_at	9.21	0	0	0	1.982	0.10436	2.75486	7186.55	19797.9	retinoic acid receptor responder (tazarotene induced) 1
207096_at	8.998	0	0	0	3.424	0.01875	7.36925	511.049	3766.05	serum amyloid A4, constitutive
211506_s_at	8.948	0	0	0	1.915	0.11368	3.63463	3473.8	12626	interleukin 8
202357_s_at	8.853	0	0	0	9.092	0.00027	3.36391	6425.3	21614.2	B-factor, properdin
228058_at	8.834	0	0	0	3.35	0.02032	3.36857	1840.83	6200.97	similar to common salivary protein 1
204748_at	8.541	0	0	0	3.999	0.01034	6.78115	547.339	3711.59	prostaglandin-endoperoxide synthase 2 (prostaglandin G/H synthase and cyclooxygenase)
209267_s_at	8.442	0	0	0	7.263	0.00077	16.6999	35.4372	591.798	solute carrier family 39 (zinc transporter), member 8
219630_at	8.425	0	0	0	7.753	0.00057	5.68631	952.769	5417.74	membrane-associated protein 17
206391_at	8.189	0	0	0	2.037	0.09725	2.86766	5227.05	14989.4	retinoic acid receptor responder (tazarotene induced) 1
205863_at	8.093	0	0	0	3.796	0.01267	11.7944	17.3322	204.423	S100 calcium binding protein A12 (calgranulin C) /// S100 calcium binding protein A12 (calgranulin C)
209457_at	8.078	0	0	0	3.63	0.01506	5.27817	309.4	1633.07	dual specificity phosphatase 5
201860_s_at	7.961	0	0	0	2.32	0.06806	3.26081	2314.82	7548.2	plasminogen activator, tissue
211906_s_at	7.959	0	0	0	16.223	2e-05	2.62379	9077.37	23817.1	serine (or cysteine) proteinase inhibitor, clade B (ovalbumin), member 4 /// serine (or cysteine) proteinase inhibitor, clade B (ovalbumin), member 4
215101_s_at	7.953	0	0	0	2.353	0.06529	13.4431	5.48853	73.7829	chemokine (C-X-C motif) ligand 5
218541_s_at	7.813	0	0	0	2.933	0.03253	3.37774	1058.84	3576.47	chromosome 8 open reading frame 4
1553589_a_at	7.399	0	0	0	8.101	0.00046	5.54495	529.533	2936.24	membrane-associated protein 17
206336_at	7.264	0	0	0	3.558	0.01626	3.77875	3523.77	13315.4	chemokine (C-X-C motif) ligand 6 (granulocyte chemotactic protein 2)
228969_at	7.243	0	0	0	5.772	0.00219	2.86925	4056.84	11640.1	anterior gradient 2 homolog (Xenopus laevis)
208962_s_at	7.127	0	0	0	3.306	0.02134	4.59956	468.457	2154.7	fatty acid desaturase 1
205207_at	7.122	0	0	0	21.477	0	24.3511	5.35988	130.519	interleukin 6 (interferon, beta 2)
36711_at	7.057	0	0	0	5.694	0.00233	3.54776	905.78	3213.49	v-maf musculoaponeurotic fibrosarcoma oncogene homolog F (avian)
207442_at	7.026	0	0	0	11.71	8e-05	22.8726	10.553	241.375	colony stimulating factor 3 (granulocyte)
202638_s_at	7.01	0	0	0	5.956	0.00191	8.31441	54.2501	451.058	intercellular adhesion molecule 1 (CD54), human rhinovirus receptor
216841_s_at	6.962	0	0	0	6.369	0.00141	4.6056	736.614	3392.55	superoxide dismutase 2, mitochondrial
232082_x_at	6.804	0	0	0	4.513	0.00632	9.78125	78.6453	769.249	---
206714_at	6.784	0	0	0	2.781	0.03886	5.60347	41.5374	232.754	arachidonate 15-lipoxygenase, second type
204818_at	6.768	0	0	0	3.316	0.02111	5.01678	258.927	1298.98	hydroxysteroid (17-beta) dehydrogenase 2
202510_s_at	6.693	0	0	0	3.547	0.01644	4.62336	701.912	3245.19	tumor necrosis factor, alpha-induced protein 2
213418_at	6.489	0	0	0	2.761	0.03979	8.26539	9.34044	77.2023	heat shock 70kDa protein 6 (HSP70B')
203240_at	6.473	0	0	0	3.202	0.02394	11.9694	15.1585	181.438	Fc fragment of IgG binding protein
222646_s_at	6.368	0	0	0	4.693	0.00537	2.66555	3324.46	8861.5	ERO1-like (S. cerevisiae)
231771_at	6.286	0	0	0	1.694	0.15103	5.49111	62.6124	343.812	gap junction protein, beta 6 (connexin 30)
214456_x_at	6.279	0	0	0	3.465	0.01794	2.61039	4516.9	11790.9	serum amyloid A1
208539_x_at	6.161	0	0	0	4.237	0.00819	5.41275	252.96	1369.21	small proline-rich protein 2A
217388_s_at	6.112	0	0	0	6.943	0.00095	2.58435	3519.86	9096.55	kynureninase (L-kynurenine hydrolase)
206421_s_at	6.07	0	0	0	2.396	0.06191	4.3302	737.577	3193.85	serine (or cysteine) proteinase inhibitor, clade B (ovalbumin), member 7
204475_at	6.03	0	0	0	4.395	0.00706	3.85639	742.77	2864.41	matrix metalloproteinase 1 (interstitial collagenase)
213432_at	6.003	0	0	0	1.195	0.28553	7.94833	670.916	5332.66	mucin 5, subtype B, tracheobronchial
218498_s_at	5.878	0	0.00353	0	4.176	0.00869	2.67911	1538.06	4120.62	ERO1-like (S. cerevisiae)
236045_x_at	5.801	1e-05	0.00353	0	3.988	0.01045	5.51936	86.0842	475.129	LOC441801
202859_x_at	5.777	1e-05	0.00549	0	2.62	0.04707	2.31858	8451.29	19595	KIAA0476
210663_s_at	5.762	1e-05	0.00549	0	5.123	0.0037	2.81985	1114.19	3141.84	kynureninase (L-kynurenine hydrolase)
214073_at	5.719	1e-05	0.00549	0	2.553	0.05111	5.88282	51.5268	303.123	cortactin
225809_at	5.693	1e-05	0.00549	0	12.362	6e-05	3.63822	513.752	1869.14	DKFZP564O0823 protein
203060_s_at	5.667	1e-05	0.00549	0	6.574	0.00122	6.54275	112.176	733.942	3'-phosphoadenosine 5'-phosphosulfate synthase 2
201275_at	5.654	1e-05	0.00549	0	7.419	0.0007	2.24834	4403.66	9900.93	farnesyl diphosphate synthase (farnesyl pyrophosphate synthetase, dimethylallyltranstransferase, geranyltranstransferase)
204385_at	5.649	1e-05	0.00549	0	7.682	0.0006	3.0426	998.855	3039.12	kynureninase (L-kynurenine hydrolase)
202219_at	5.632	2e-05	0.00549	0	2.354	0.06525	2.18929	4300.18	9414.35	solute carrier family 6 (neurotransmitter transporter, creatine), member 8
209774_x_at	5.609	2e-05	0.00549	0	2.911	0.03337	3.35236	1222.78	4099.18	chemokine (C-X-C motif) ligand 2
202912_at	5.591	2e-05	0.00549	0	3.275	0.02207	2.46061	1958.7	4819.6	adrenomedullin
210845_s_at	5.589	2e-05	0.00549	0	3.607	0.01543	3.38187	229.597	776.468	plasminogen activator, urokinase receptor
221872_at	5.569	2e-05	0.00549	0	1.985	0.10386	1.99427	7252.57	14463.6	retinoic acid receptor responder (tazarotene induced) 1
221750_at	5.549	2e-05	0.00549	0	4.238	0.00818	2.6518	1330.5	3528.22	3-hydroxy-3-methylglutaryl-Coenzyme A synthase 1 (soluble)
202998_s_at	5.515	3e-05	0.00549	0	1.729	0.14438	3.2159	264.139	849.445	lysyl oxidase-like 2
205822_s_at	5.511	3e-05	0.00549	0	1.476	0.19997	3.13592	64.3451	201.781	3-hydroxy-3-methylglutaryl-Coenzyme A synthase 1 (soluble)
203535_at	5.504	3e-05	0.00549	0	4.858	0.00464	1.66429	18630.5	31006.6	S100 calcium binding protein A9 (calgranulin B)
209146_at	5.477	3e-05	0.00812	0	3.055	0.02826	1.84369	10192.6	18792.1	sterol-C4-methyl oxidase-like
218687_s_at	5.375	6e-05	0.01335	0	1.556	0.18038	3.93662	445.523	1753.85	mucin 13, epithelial transmembrane
213817_at	5.359	6e-05	0.01347	0	2.179	0.08118	2.78889	933.01	2602.06	CDNA FLJ13601 fis, clone PLACE1010069
201601_x_at	5.323	7e-05	0.01347	0	6.34	0.00144	2.64521	2119.06	5605.36	interferon induced transmembrane protein 1 (9-27)
209921_at	5.314	8e-05	0.01347	0	2.891	0.03415	5.90257	71.4223	421.575	solute carrier family 7, (cationic amino acid transporter, y+ system) member 11
218484_at	5.278	9e-05	0.01347	0	0.559	0.60029	1.88316	203.347	382.935	NADH:ubiquinone oxidoreductase MLRQ subunit homolog
205681_at	5.278	9e-05	0.01347	0	3.219	0.02349	5.3091	115.161	611.402	BCL2-related protein A1
201631_s_at	5.273	9e-05	0.01347	0	4.809	0.00485	2.46593	3255.77	8028.49	immediate early response 3
214022_s_at	5.268	9e-05	0.01347	0	5.764	0.00221	2.61612	2304.09	6027.79	interferon induced transmembrane protein 1 (9-27)
201925_s_at	5.268	9e-05	0.01347	0	5.687	0.00234	2.77835	1540.55	4280.19	decay accelerating factor for complement (CD55, Cromer blood group system)
202934_at	5.26	9e-05	0.01347	0	4.367	0.00724	3.01349	991.861	2988.96	hexokinase 2
200832_s_at	5.227	0.00011	0.01347	0	5.161	0.00358	1.91944	8796.13	16883.6	stearoyl-CoA desaturase (delta-9-desaturase)
213843_x_at	5.219	0.00011	0.01347	0	2.355	0.06519	2.43847	1464.26	3570.56	solute carrier family 6 (neurotransmitter transporter, creatine), member 8
1555950_a_at	5.2	0.00013	0.01347	0	6.878	0.00099	2.45129	1613.14	3954.28	decay accelerating factor for complement (CD55, Cromer blood group system)
201926_s_at	5.187	0.00013	0.01347	0	5.826	0.0021	2.60533	1473.67	3839.4	decay accelerating factor for complement (CD55, Cromer blood group system)
227850_x_at	5.131	0.00018	0.01554	0	9.443	0.00022	2.28129	2063.45	4707.32	CDC42 effector protein (Rho GTPase binding) 5
225750_at	5.038	0.00028	0.01882	0	5.57	0.00257	2.66887	1148.79	3065.97	ERO1-like (S. cerevisiae)
206467_x_at	4.978	0.00038	0.01882	0	14.384	3e-05	10.1469	5.37884	54.5787	tumor necrosis factor receptor superfamily, member 6b, decoy /// regulator of telomere elongation helicase 1
217173_s_at	4.921	0.0005	0.01882	0	0.622	0.5613	2.04302	173.706	354.885	low density lipoprotein receptor (familial hypercholesterolemia)
228648_at	4.914	0.00051	0.01882	0	6.028	0.00181	2.61397	673.935	1761.65	leucine-rich alpha-2-glycoprotein 1
202917_s_at	4.858	0.00067	0.01882	0	2.439	0.05876	1.8997	16903.5	32111.5	S100 calcium binding protein A8 (calgranulin A)
201627_s_at	4.834	0.00075	0.01882	0	2.052	0.09536	2.12274	1968.38	4178.37	insulin induced gene 1
219410_at	4.824	0.00078	0.01882	0	1.309	0.24734	2.23435	1842.15	4116.02	transmembrane protein 45A
202554_s_at	4.821	0.00078	0.01882	0	0.425	0.68879	1.9206	59.9314	115.104	glutathione S-transferase M3 (brain)
225344_at	4.818	0.00078	0.01882	0	6.118	0.00169	2.04387	7239.17	14795.9	nuclear receptor coactivator 7
216028_at	4.781	0.00094	0.01882	0	0.904	0.40757	1.85817	447.905	832.283	DKFZP564C152 protein
228964_at	4.732	0.00117	0.01882	0	3.288	0.02176	4.57537	73.4205	335.926	PR domain containing 1, with ZNF domain
215812_s_at	4.731	0.00117	0.01882	0	2.535	0.05222	2.35618	1272.14	2997.39	solute carrier family 6 (neurotransmitter transporter, creatine), member 8 /// similar to sodium- and chloride-dependent creatine transporter
210854_x_at	4.719	0.00123	0.01882	0	2.369	0.06405	2.11815	1539.07	3259.97	solute carrier family 6 (neurotransmitter transporter, creatine), member 8
209616_s_at	4.711	0.00127	0.01906	0	0.614	0.56613	1.48177	3402.41	5041.61	carboxylesterase 1 (monocyte/macrophage serine esterase 1)
219727_at	4.696	0.00134	0.01906	0	12.115	7e-05	2.90992	598.348	1741.14	dual oxidase 2
218810_at	4.635	0.00179	0.01906	0	5.044	0.00395	3.37734	345.991	1168.53	hypothetical protein FLJ23231
205729_at	4.632	0.0018	0.01906	0	0.341	0.74706	1.33872	364.587	488.08	oncostatin M receptor
214385_s_at	4.611	0.00197	0.01906	0	1.984	0.10401	8.22677	14.8332	122.029	mucin 5, subtypes A and C, tracheobronchial/gastric
220322_at	4.604	0.00202	0.01906	0	5.613	0.00248	4.92662	60.1255	296.215	interleukin 1 family, member 9
201042_at	4.589	0.00216	0.01906	0	1.423	0.21393	2.40419	766.099	1841.85	transglutaminase 2 (C polypeptide, protein-glutamine-gamma-glutamyltransferase)
221477_s_at	4.542	0.00268	0.01906	1e-05	4.648	0.00559	2.84248	515.585	1465.54	FLJ43505 protein
1566342_at	4.471	0.0037	0.02026	1e-05	3.602	0.01551	3.63155	614.672	2232.21	---
201626_at	4.465	0.00377	0.02026	1e-05	3.023	0.02932	1.91017	3206.77	6125.47	insulin induced gene 1
1554462_a_at	4.461	0.00382	0.02026	1e-05	1.926	0.11203	1.73937	1441.5	2507.3	DnaJ (Hsp40) homolog, subfamily B, member 9
210397_at	4.447	0.00404	0.02177	1e-05	0.989	0.36807	2.40186	170.882	410.435	defensin, beta 1
204351_at	4.425	0.00443	0.02324	1e-05	3.876	0.01168	1.47084	21233.8	31231.4	S100 calcium binding protein P
202068_s_at	4.393	0.00509	0.0239	1e-05	3.099	0.02689	2.03202	2388.37	4853.22	low density lipoprotein receptor (familial hypercholesterolemia)
208747_s_at	4.367	0.00564	0.0239	1e-05	2.383	0.0629	8.14673	6.03416	49.1587	complement component 1, s subcomponent
213524_s_at	4.339	0.00633	0.0239	1e-05	3.479	0.01767	2.67198	640.037	1710.16	putative lymphocyte G0/G1 switch gene
202637_s_at	4.338	0.00633	0.0239	1e-05	4.23	0.00825	3.41023	117.144	399.487	intercellular adhesion molecule 1 (CD54), human rhinovirus receptor
204687_at	4.316	0.00696	0.02525	2e-05	7.152	0.00083	3.6633	180.419	660.93	DKFZP564O0823 protein
219888_at	4.306	0.00721	0.02525	2e-05	2.266	0.07282	3.77709	50.2709	189.878	sperm associated antigen 4
214303_x_at	4.283	0.00795	0.02525	2e-05	2.27	0.07242	11.0919	11.2995	125.333	mucin 5, subtypes A and C, tracheobronchial/gastric
206300_s_at	4.28	0.00797	0.02525	2e-05	1.778	0.13547	1.95339	2597.99	5074.89	parathyroid hormone-like hormone
208963_x_at	4.273	0.00818	0.02525	2e-05	4.007	0.01026	2.95452	435.514	1286.73	fatty acid desaturase 1
236979_at	4.264	0.00845	0.02525	2e-05	8.863	0.0003	6.48953	19.4622	126.301	Similar to Gm566 protein
211756_at	4.256	0.00868	0.02525	2e-05	2.197	0.07936	1.88573	5754.88	10852.1	parathyroid hormone-like hormone /// parathyroid hormone-like hormone
226621_at	4.243	0.00912	0.02525	2e-05	3.635	0.01499	2.12067	1392.94	2953.97	Microtubule associated serine/threonine kinase-like
208881_x_at	4.238	0.00925	0.02525	2e-05	9.589	0.00021	1.95417	4874.15	9524.9	isopentenyl-diphosphate delta isomerase
230746_s_at	4.226	0.00966	0.02615	2e-05	1.129	0.31027	3.04065	622.251	1892.05	---
204224_s_at	4.225	0.00966	0.02615	2e-05	7.01	0.00091	2.16108	1268.91	2742.22	GTP cyclohydrolase 1 (dopa-responsive dystonia)
229499_at	4.223	0.00968	0.02615	2e-05	1.019	0.35479	1.84707	676.428	1249.41	calpain 13
222712_s_at	4.211	0.01017	0.0274	3e-05	1.533	0.18574	2.04029	390.514	796.76	mucin 13, epithelial transmembrane
209608_s_at	4.195	0.01082	0.02943	3e-05	4.643	0.00562	2.09146	1262.35	2640.16	acetyl-Coenzyme A acetyltransferase 2 (acetoacetyl Coenzyme A thiolase)
242013_at	4.186	0.01114	0.02943	3e-05	3.387	0.01952	5.94494	20.2983	120.672	Similar to Gm566 protein
224325_at	4.172	0.0117	0.02943	3e-05	2.957	0.03163	4.08665	47.2576	193.125	frizzled homolog 8 (Drosophila) /// frizzled homolog 8 (Drosophila)
208964_s_at	4.164	0.01205	0.02977	3e-05	3.396	0.01934	2.77822	369.39	1026.25	fatty acid desaturase 1
1555167_s_at	4.149	0.01279	0.02977	3e-05	1.031	0.34982	1.70059	562.627	956.794	pre-B-cell colony enhancing factor 1
201502_s_at	4.13	0.01367	0.02977	4e-05	4.995	0.00412	2.14573	2259.67	4848.63	nuclear factor of kappa light polypeptide gene enhancer in B-cells inhibitor, alpha
205479_s_at	4.123	0.01401	0.02977	4e-05	5.373	0.00301	2.36612	1298.68	3072.83	plasminogen activator, urokinase
230615_at	4.072	0.01737	0.03091	5e-05	4.873	0.00458	5.33837	7.13204	38.0735	similar to Numb-interacting homolog gene
219869_s_at	4.036	0.01997	0.03094	5e-05	4.689	0.00539	5.64846	4.07965	23.0438	solute carrier family 39 (zinc transporter), member 8
202067_s_at	4.034	0.01997	0.03094	5e-05	1.126	0.31124	2.06408	419.023	864.898	low density lipoprotein receptor (familial hypercholesterolemia)
225601_at	4.027	0.02049	0.03094	6e-05	3.95	0.01085	2.10259	1349.25	2836.91	Transcribed locus
219117_s_at	4.023	0.02069	0.03094	6e-05	4.787	0.00494	2.55101	1180.64	3011.83	FK506 binding protein 11, 19 kDa
204166_at	4.014	0.02137	0.03094	6e-05	3.488	0.0175	2.07983	721.597	1500.8	---
212671_s_at	3.995	0.02278	0.03094	6e-05	0.751	0.48626	2.67234	28.7665	76.8739	major histocompatibility complex, class II, DQ alpha 1 /// major histocompatibility complex, class II, DQ alpha 2
205680_at	3.994	0.02278	0.03094	6e-05	1.254	0.26533	1.32376	12095.4	16011.3	matrix metalloproteinase 10 (stromelysin 2)
204615_x_at	3.976	0.02441	0.03094	7e-05	7.481	0.00067	1.86294	5118.6	9535.63	isopentenyl-diphosphate delta isomerase
206170_at	3.958	0.02618	0.03094	8e-05	2.97	0.03116	2.29543	563.846	1294.27	adrenergic, beta-2-, receptor, surface
202842_s_at	3.955	0.02633	0.03094	8e-05	6.659	0.00115	1.95778	1608	3148.12	DnaJ (Hsp40) homolog, subfamily B, member 9
216607_s_at	3.946	0.0272	0.03094	8e-05	1.015	0.35682	1.51696	2986.51	4530.42	cytochrome P450, family 51, subfamily A, polypeptide 1
222847_s_at	3.944	0.02721	0.03094	8e-05	2.919	0.03304	2.4837	636.649	1581.25	egl nine homolog 3 (C. elegans)
202735_at	3.902	0.03176	0.03094	0.0001	4.098	0.00937	1.80739	1568.72	2835.29	emopamil binding protein (sterol isomerase)
219938_s_at	3.9	0.03179	0.03094	0.0001	8.299	0.00041	3.05228	243.555	743.398	proline-serine-threonine phosphatase interacting protein 2
206199_at	3.899	0.03179	0.03094	0.0001	2.214	0.07771	3.90681	10.2954	40.2222	carcinoembryonic antigen-related cell adhesion molecule 7
221577_x_at	3.891	0.03263	0.03175	0.0001	2.484	0.05558	2.12465	4376.61	9298.75	growth differentiation factor 15
211668_s_at	3.89	0.03263	0.03175	0.0001	3.73	0.01358	2.09807	1241.2	2604.12	plasminogen activator, urokinase /// plasminogen activator, urokinase
1556773_at	3.867	0.0356	0.03237	0.00011	1.487	0.19721	1.90019	3048.08	5791.94	Parathyroid hormone-like hormone
237099_at	3.859	0.0366	0.03237	0.00011	5.178	0.00353	2.68177	602.591	1616.01	chromosome 20 open reading frame 70
209189_at	3.852	0.03706	0.03237	0.00012	1.605	0.16947	2.9683	100.159	297.301	v-fos FBJ murine osteosarcoma viral oncogene homolog
219795_at	3.852	0.03706	0.03237	0.00012	8.266	0.00042	1.58079	11580.1	18305.7	solute carrier family 6 (neurotransmitter transporter), member 14
217996_at	3.842	0.0384	0.03237	0.00012	0.895	0.41181	2.00677	482.892	969.055	pleckstrin homology-like domain, family A, member 1
209173_at	3.832	0.03952	0.03237	0.00013	3.073	0.02768	1.46546	25606.4	37525	anterior gradient 2 homolog (Xenopus laevis)
210950_s_at	3.831	0.03952	0.03237	0.00013	2.468	0.0567	1.53434	8192.72	12570.4	farnesyl-diphosphate farnesyltransferase 1
203963_at	3.83	0.03952	0.03237	0.00013	5.188	0.0035	1.87451	1986.03	3722.85	carbonic anhydrase XII
211924_s_at	3.815	0.04181	0.03422	0.00014	3.436	0.01851	2.91964	387.245	1130.62	plasminogen activator, urokinase receptor /// plasminogen activator, urokinase receptor
203058_s_at	3.813	0.04198	0.03422	0.00014	9.538	0.00021	4.74192	54.4693	258.289	3'-phosphoadenosine 5'-phosphosulfate synthase 2
204470_at	3.803	0.04348	0.03474	0.00014	3.102	0.0268	1.98321	7736.16	15342.5	chemokine (C-X-C motif) ligand 1 (melanoma growth stimulating activity, alpha)
204017_at	3.8	0.04368	0.03474	0.00014	4.489	0.00646	2.87877	369.239	1062.95	KDEL (Lys-Asp-Glu-Leu) endoplasmic reticulum protein retention receptor 3
219118_at	3.793	0.04463	0.03474	0.00015	3.738	0.01346	2.72837	291.866	796.319	FK506 binding protein 11, 19 kDa
238029_s_at	3.782	0.04655	0.03563	0.00016	1.935	0.11076	1.6706	890.917	1488.36	solute carrier family 16 (monocarboxylic acid transporters), member 14
202843_at	3.77	0.04853	0.03639	0.00016	3.279	0.02199	2.54626	320.315	815.605	ralA binding protein 1
242517_at	3.759	0.05021	0.03639	0.00017	1.929	0.11169	3.88432	7.26436	28.2171	G protein-coupled receptor 54
201625_s_at	3.759	0.05021	0.03639	0.00017	2.32	0.06807	2.20203	453.592	998.821	insulin induced gene 1
201790_s_at	3.748	0.05221	0.03639	0.00018	3.053	0.02832	1.98872	728.393	1448.57	7-dehydrocholesterol reductase
206825_at	3.745	0.05223	0.03639	0.00018	0.325	0.75804	1.46299	299.066	437.532	oxytocin receptor
211708_s_at	3.735	0.05396	0.03639	0.00019	-0.161	0.87846	0.75554	244.423	184.67	stearoyl-CoA desaturase (delta-9-desaturase) /// stearoyl-CoA desaturase (delta-9-desaturase)
203108_at	3.701	0.06148	0.03724	0.00021	2.702	0.04266	1.76705	2970.98	5249.87	G protein-coupled receptor, family C, group 5, member A
221669_s_at	3.673	0.06786	0.03735	0.00024	3.43	0.01863	2.07418	658.424	1365.69	acyl-Coenzyme A dehydrogenase family, member 8
208937_s_at	3.671	0.06797	0.03735	0.00024	2.396	0.06193	1.40678	13270.7	18668.9	inhibitor of DNA binding 1, dominant negative helix-loop-helix protein
208891_at	3.656	0.07191	0.03735	0.00026	0.745	0.49005	1.7866	742.437	1326.44	dual specificity phosphatase 6
200831_s_at	3.642	0.07502	0.03735	0.00027	1.789	0.13364	1.56545	1523.72	2385.3	stearoyl-CoA desaturase (delta-9-desaturase)
209652_s_at	3.634	0.07716	0.03735	0.00028	2.024	0.09881	3.44011	72.6596	249.957	placental growth factor, vascular endothelial growth factor-related protein
205193_at	3.629	0.07788	0.03735	0.00028	6.568	0.00123	2.62098	461.422	1209.38	v-maf musculoaponeurotic fibrosarcoma oncogene homolog F (avian)
218990_s_at	3.605	0.0844	0.03855	0.00031	4.043	0.00989	2.25534	797.762	1799.23	small proline-rich protein 3
209546_s_at	3.584	0.09061	0.03855	0.00034	1.327	0.24192	1.4889	2781.22	4140.95	apolipoprotein L, 1
210355_at	3.576	0.09317	0.03855	0.00035	2.102	0.08953	1.7264	3852.93	6651.69	parathyroid hormone-like hormone
202558_s_at	3.568	0.09555	0.03932	0.00036	3.503	0.01722	2.07163	376.186	779.318	stress 70 protein chaperone, microsome-associated, 60kDa
208300_at	3.556	0.09958	0.03951	0.00038	5.552	0.00261	6.39372	11.0168	70.4385	protein tyrosine phosphatase, receptor type, H
218976_at	3.544	0.10348	0.03951	0.00039	4.757	0.00507	3.57631	255.684	914.406	DnaJ (Hsp40) homolog, subfamily C, member 12
211162_x_at	3.54	0.10479	0.03951	0.0004	0.159	0.87954	1.24808	205.161	256.058	stearoyl-CoA desaturase (delta-9-desaturase)
212203_x_at	3.537	0.10547	0.03951	0.00041	7.239	0.00079	1.60794	7141.94	11483.8	interferon induced transmembrane protein 3 (1-8U)
205890_s_at	3.504	0.11803	0.04043	0.00046	1.156	0.29991	3.48367	47.5615	165.689	ubiquitin D
220034_at	3.496	0.12071	0.04043	0.00047	1.867	0.12087	2.48531	93.9458	233.485	interleukin-1 receptor-associated kinase 3
214211_at	3.494	0.121	0.04043	0.00048	5.895	0.002	1.70399	4041.6	6886.83	ferritin, heavy polypeptide 1
1554452_a_at	3.459	0.13703	0.04299	0.00054	4.749	0.00511	2.10616	1017.73	2143.49	hypoxia-inducible protein 2
202619_s_at	3.456	0.13769	0.0435	0.00055	4.922	0.00439	1.95957	1480.3	2900.75	procollagen-lysine, 2-oxoglutarate 5-dioxygenase 2
210538_s_at	3.454	0.13802	0.04421	0.00055	3.041	0.02873	2.76834	394.021	1090.79	baculoviral IAP repeat-containing 3
239586_at	3.446	0.14125	0.0467	0.00057	3.726	0.01362	1.95809	1467.21	2872.94	hypothetical protein MGC14128
208647_at	3.439	0.14461	0.04696	0.00058	5.285	0.00323	1.52575	11669.5	17804.8	farnesyl-diphosphate farnesyltransferase 1
221898_at	3.419	0.15502	0.04696	0.00063	1.373	0.22807	1.84279	355.655	655.398	lung type-I cell membrane-associated glycoprotein
202833_s_at	3.399	0.16525	0.04763	0.00068	4.5	0.0064	2.39759	312.737	749.812	angiotensinogen (serine (or cysteine) proteinase inhibitor, clade A (alpha-1 antiproteinase, antitrypsin), member 8)
208892_s_at	3.394	0.16739	0.04853	0.00069	0.779	0.47133	1.85579	625.288	1160.4	dual specificity phosphatase 6
223278_at	3.383	0.17353	0.04853	0.00072	1.99	0.10323	1.4794	9572.72	14161.9	gap junction protein, beta 2, 26kDa (connexin 26)
205542_at	3.376	0.17724	0.04853	0.00074	0.722	0.50255	1.61896	839.479	1359.08	six transmembrane epithelial antigen of the prostate
204298_s_at	3.37	0.18006	0.04853	0.00075	2.719	0.04184	2.18465	494.947	1081.29	lysyl oxidase
201201_at	3.364	0.18352	0.05068	0.00077	6.602	0.0012	1.43197	18190.9	26048.8	cystatin B (stefin B)
210896_s_at	3.35	0.19184	0.05068	0.00081	1.791	0.13333	1.44658	4763.5	6890.77	aspartate beta-hydroxylase
230492_s_at	3.347	0.19337	0.05132	0.00082	1.091	0.32492	1.57497	454.632	716.029	hypothetical protein KIAA1434
203027_s_at	3.341	0.19689	0.05195	0.00084	3.581	0.01586	3.86065	27.8402	107.481	mevalonate (diphospho) decarboxylase
224959_at	3.336	0.19862	0.05213	0.00085	2.425	0.05971	1.81091	1024.71	1855.66	solute carrier family 26 (sulfate transporter), member 2
213787_s_at	3.336	0.19862	0.05213	0.00085	3.936	0.011	1.79554	2104.8	3779.25	emopamil binding protein (sterol isomerase)
204908_s_at	3.317	0.21065	0.05313	0.00091	3.581	0.01586	2.05711	1179.71	2426.81	B-cell CLL/lymphoma 3
223541_at	3.312	0.21402	0.05313	0.00093	2.957	0.03163	1.89291	1561.11	2955.03	hyaluronan synthase 3
220192_x_at	3.303	0.21872	0.0547	0.00096	5.262	0.00329	2.65318	230.207	610.78	SAM pointed domain containing ets transcription factor
201791_s_at	3.302	0.21887	0.0547	0.00096	5.999	0.00185	2.35422	425.765	1002.34	7-dehydrocholesterol reductase
227405_s_at	3.3	0.2194	0.0547	0.00097	3.031	0.02905	2.15865	313.846	677.483	frizzled homolog 8 (Drosophila)
203404_at	3.281	0.2327	0.05561	0.00103	2.144	0.08488	2.20884	597.301	1319.34	armadillo repeat containing, X-linked 2
212012_at	3.278	0.23326	0.05561	0.00104	1.473	0.20062	2.23592	231.604	517.848	Melanoma associated gene
219956_at	3.278	0.23326	0.05561	0.00105	1.455	0.20552	2.78374	37.5413	104.505	UDP-N-acetyl-alpha-D-galactosamine:polypeptide N-acetylgalactosaminyltransferase 6 (GalNAc-T6)
234709_at	3.275	0.23494	0.05561	0.00106	0.537	0.61427	1.70727	81.2179	138.661	calpain 13
214549_x_at	3.269	0.23872	0.05561	0.00108	2.837	0.03639	2.03427	1890.57	3845.92	small proline-rich protein 1A
227530_at	3.267	0.23883	0.05561	0.00109	1.895	0.11668	3.74323	66.7703	249.937	A kinase (PRKA) anchor protein (gravin) 12
226390_at	3.251	0.24931	0.05561	0.00115	2.174	0.0817	2.35286	229.711	540.479	START domain containing 4, sterol regulated
212190_at	3.245	0.25345	0.05561	0.00117	1.198	0.28461	1.76745	519.023	917.349	serine (or cysteine) proteinase inhibitor, clade E (nexin, plasminogen activator inhibitor type 1), member 2
210664_s_at	3.238	0.25773	0.05561	0.0012	2.119	0.08758	1.83711	607.86	1116.71	tissue factor pathway inhibitor (lipoprotein-associated coagulation inhibitor)
200748_s_at	3.232	0.26109	0.05561	0.00123	4.303	0.00769	1.38971	24914.4	34623.9	ferritin, heavy polypeptide 1
208658_at	3.222	0.27022	0.05561	0.00128	3.283	0.02188	1.7507	2025.64	3546.28	protein disulfide isomerase related protein (calcium-binding protein, intestinal-related)
201169_s_at	3.215	0.27512	0.05561	0.0013	0.924	0.39771	1.52012	852.509	1295.92	basic helix-loop-helix domain containing, class B, 2
241994_at	3.213	0.276	0.05561	0.00131	3.371	0.01987	4.84068	4.80199	23.2449	Xanthine dehydrogenase
212218_s_at	3.206	0.28116	0.05561	0.00134	1.549	0.18203	1.62413	1854.66	3012.21	fatty acid synthase
228325_at	3.202	0.28363	0.05561	0.00136	5.268	0.00328	2.6102	147.311	384.51	KIAA0146 protein
217739_s_at	3.196	0.28737	0.05561	0.00139	3.369	0.0199	1.70072	4294.15	7303.13	pre-B-cell colony enhancing factor 1
202620_s_at	3.193	0.28951	0.05561	0.00141	2.784	0.0387	1.65909	3885.69	6446.7	procollagen-lysine, 2-oxoglutarate 5-dioxygenase 2
235252_at	3.191	0.28989	0.05561	0.00142	3.6	0.01555	2.42334	234.813	569.033	Kinase suppressor of ras
203934_at	3.187	0.29256	0.05561	0.00144	0.867	0.42551	2.14494	21.1299	45.3223	kinase insert domain receptor (a type III receptor tyrosine kinase)
201328_at	3.186	0.29256	0.05561	0.00144	5.617	0.00247	1.69788	2916.9	4952.56	v-ets erythroblastosis virus E26 oncogene homolog 2 (avian)
202644_s_at	3.186	0.29256	0.05561	0.00144	4.946	0.0043	1.85188	1734.06	3211.27	tumor necrosis factor, alpha-induced protein 3
212473_s_at	3.167	0.31047	0.05687	0.00154	4.225	0.00829	1.90105	657.714	1250.35	flavoprotein oxidoreductase MICAL2
210102_at	3.161	0.31609	0.05696	0.00157	9.598	0.00021	1.9321	719.119	1389.41	loss of heterozygosity, 11, chromosomal region 2, gene A
211959_at	3.158	0.31761	0.05696	0.00159	1.626	0.16489	1.696	6329.16	10734.2	insulin-like growth factor binding protein 5
202539_s_at	3.153	0.32145	0.05891	0.00162	2.914	0.03324	1.57839	2620.54	4136.23	3-hydroxy-3-methylglutaryl-Coenzyme A reductase
201315_x_at	3.147	0.32703	0.05991	0.00165	6.074	0.00175	1.69869	4013.44	6817.59	interferon induced transmembrane protein 2 (1-8D)
203837_at	3.145	0.32781	0.05991	0.00166	3.128	0.02601	1.62832	1644.45	2677.69	mitogen-activated protein kinase kinase kinase 5
204885_s_at	3.081	0.39944	0.06305	0.00206	1.284	0.25547	1.71632	166.952	286.543	mesothelin
205003_at	3.079	0.40121	0.06353	0.00208	1.931	0.11132	3.29957	76.4179	252.146	dedicator of cytokinesis 4
205239_at	3.071	0.4095	0.06563	0.00213	0.677	0.52827	1.70063	300.626	511.253	amphiregulin (schwannoma-derived growth factor)
212657_s_at	3.071	0.4095	0.06563	0.00213	2.765	0.03962	1.89788	3524.82	6689.68	interleukin 1 receptor antagonist
238741_at	3.064	0.41696	0.06563	0.00218	3.502	0.01725	2.15993	783.826	1693.01	hypothetical protein MGC14128
201313_at	3.05	0.43404	0.06654	0.00229	2.472	0.0564	2.96188	173.224	513.068	enolase 2 (gamma, neuronal)
206504_at	3.046	0.43913	0.067	0.00232	1.927	0.11187	3.22984	71.1126	229.682	cytochrome P450, family 24, subfamily A, polypeptide 1
217738_at	3.043	0.44138	0.06741	0.00234	3.685	0.01421	1.72613	1863.13	3216	pre-B-cell colony enhancing factor 1
201818_at	3.034	0.4526	0.06741	0.00242	3.808	0.01252	1.90543	846.99	1613.88	hypothetical protein FLJ12443
238460_at	3.029	0.45634	0.06741	0.00245	3.572	0.01601	1.93726	891.341	1726.76	hypothetical protein MGC14128
217356_s_at	3.028	0.45634	0.06741	0.00246	2.011	0.10047	1.37303	17179.8	23588.3	phosphoglycerate kinase 1
238542_at	3.026	0.45793	0.06741	0.00248	1.173	0.29347	2.41717	63.19	152.741	UL16 binding protein 2
219232_s_at	3.024	0.45914	0.06785	0.00249	3.544	0.0165	2.18615	389.426	851.345	egl nine homolog 3 (C. elegans)
1567107_s_at	3.02	0.46377	0.06824	0.00253	0.226	0.83012	1.17039	923.444	1080.79	tropomyosin 3 /// tropomyosin 4
201137_s_at	3.013	0.47254	0.06824	0.00258	2.259	0.07349	3.00468	155.421	466.992	major histocompatibility complex, class II, DP beta 1
227697_at	3.002	0.48409	0.06824	0.00268	6.874	0.001	3.81655	24.5304	93.6214	suppressor of cytokine signaling 3
203973_s_at	2.992	0.4981	0.06824	0.00277	6.248	0.00154	1.59048	6509.04	10352.5	CCAAT/enhancer binding protein (C/EBP), delta
205064_at	2.989	0.5009	0.06844	0.0028	2.296	0.07012	1.83178	3639.04	6665.92	small proline-rich protein 1B (cornifin)
203574_at	2.984	0.5059	0.06886	0.00284	2.856	0.03557	2.09411	739.054	1547.66	nuclear factor, interleukin 3 regulated
224739_at	2.981	0.51016	0.06928	0.00287	4.795	0.00491	1.67472	2602.04	4357.68	pim-3 oncogene
202314_at	2.979	0.51212	0.06969	0.00289	3.504	0.01721	1.69489	4976.63	8434.85	cytochrome P450, family 51, subfamily A, polypeptide 1
209344_at	2.968	0.52518	0.07156	0.003	0.271	0.79756	1.16768	1728.04	2017.8	tropomyosin 4
211077_s_at	2.961	0.53628	0.07259	0.00307	0.428	0.68633	1.54609	63.5942	98.3224	tousled-like kinase 1 /// tousled-like kinase 1
202643_s_at	2.958	0.5389	0.07362	0.00309	6.237	0.00155	1.8149	977.229	1773.58	tumor necrosis factor, alpha-induced protein 3
217767_at	2.947	0.55697	0.07464	0.00321	0.845	0.43656	1.32795	10038.7	13330.9	complement component 3
222572_at	2.94	0.56874	0.07484	0.00329	3.147	0.02546	1.73257	2189.84	3794.06	protein phosphatase 2C, magnesium-dependent, catalytic subunit
203857_s_at	2.937	0.5709	0.07484	0.00331	3.992	0.0104	2.50893	154.455	387.516	for protein disulfide isomerase-related
219909_at	2.92	0.59706	0.07484	0.0035	1.221	0.27659	2.73716	67.2122	183.971	matrix metalloproteinase 28
210619_s_at	2.92	0.59706	0.07484	0.00351	3.02	0.02943	3.07309	4.52149	13.895	hyaluronoglucosaminidase 1
223218_s_at	2.912	0.60977	0.07484	0.00359	3.237	0.02303	1.86464	1846.07	3442.25	nuclear factor of kappa light polypeptide gene enhancer in B-cells inhibitor, zeta
207332_s_at	2.911	0.61055	0.07484	0.00361	3.704	0.01395	1.87343	1603.95	3004.89	transferrin receptor (p90, CD71)
205027_s_at	2.908	0.61461	0.07484	0.00364	2.326	0.06753	1.95046	385.804	752.495	mitogen-activated protein kinase kinase kinase 8
211654_x_at	2.904	0.61974	0.07484	0.00368	0.92	0.39991	1.85078	524.508	970.748	major histocompatibility complex, class II, DQ beta 1 /// major histocompatibility complex, class II, DQ beta 1
202671_s_at	2.901	0.62238	0.07484	0.00371	4.805	0.00486	1.75463	1281.66	2248.83	pyridoxal (pyridoxine, vitamin B6) kinase
224826_at	2.901	0.62238	0.07484	0.00372	3.682	0.01427	1.77388	1094.13	1940.86	hypothetical protein KIAA1434
201329_s_at	2.9	0.62275	0.07484	0.00374	3.043	0.02864	1.5945	2029.3	3235.72	v-ets erythroblastosis virus E26 oncogene homolog 2 (avian)
201431_s_at	2.895	0.62921	0.07484	0.00379	2.017	0.09975	1.94503	432.448	841.126	dihydropyrimidinase-like 3
202218_s_at	2.894	0.62958	0.07484	0.0038	2.807	0.03767	2.00802	545.182	1094.74	fatty acid desaturase 2
205097_at	2.889	0.63881	0.0764	0.00387	1.914	0.11374	1.78359	450.432	803.385	solute carrier family 26 (sulfate transporter), member 2
235153_at	2.869	0.67338	0.0781	0.00411	5.151	0.00361	3.65509	94.9142	346.92	hypothetical protein MGC4734
210337_s_at	2.865	0.67846	0.0781	0.00417	0.5	0.63827	1.22922	1262.56	1551.97	ATP citrate lyase
221782_at	2.845	0.71375	0.08135	0.00444	0.985	0.37001	1.30712	3667.24	4793.54	DnaJ (Hsp40) homolog, subfamily C, member 10
212143_s_at	2.844	0.71375	0.08169	0.00445	2.647	0.04561	1.27375	20900.7	26622.3	insulin-like growth factor binding protein 3
202655_at	2.843	0.71553	0.08179	0.00448	7.027	0.0009	1.71209	1470.37	2517.41	arginine-rich, mutated in early stage tumors
201642_at	2.84	0.7199	0.08179	0.00452	4.902	0.00446	1.75613	1789.77	3143.07	interferon gamma receptor 2 (interferon gamma transducer 1)
204508_s_at	2.832	0.73521	0.08289	0.00463	4.023	0.01009	2.10759	626.894	1321.23	carbonic anhydrase XII
205199_at	2.829	0.74011	0.08289	0.00467	4.631	0.00568	2.55926	187.173	479.023	carbonic anhydrase IX
205959_at	2.828	0.7413	0.08289	0.00469	1.803	0.13122	1.80954	1147.8	2076.99	matrix metalloproteinase 13 (collagenase 3) /// matrix metalloproteinase 13 (collagenase 3)
222662_at	2.821	0.75238	0.08289	0.00479	2.628	0.04667	2.52675	139.961	353.648	hypothetical protein LOC286044
205847_at	2.814	0.76362	0.08411	0.00489	5.978	0.00188	1.91698	1064.21	2040.07	protease, serine, 22
215867_x_at	2.795	0.80881	0.08595	0.0052	4.884	0.00454	1.73218	1314.48	2276.91	carbonic anhydrase XII
228141_at	2.794	0.80881	0.08595	0.00521	2.564	0.05041	1.82269	600.285	1094.14	Similar to RIKEN cDNA 2310016C16
205349_at	2.791	0.81268	0.08595	0.00526	6.134	0.00167	1.73035	958.258	1658.13	guanine nucleotide binding protein (G protein), alpha 15 (Gq class)
229296_at	2.777	0.84302	0.08757	0.00549	3.738	0.01346	1.88933	813.027	1536.08	CDNA FLJ34873 fis, clone NT2NE2014950
205499_at	2.775	0.84655	0.08757	0.00553	3.257	0.02251	1.62781	1023.51	1666.08	sushi-repeat-containing protein, X-linked 2
218018_at	2.771	0.84998	0.08757	0.0056	5.034	0.00399	1.85523	1012.38	1878.2	pyridoxal (pyridoxine, vitamin B6) kinase
210029_at	2.763	0.86273	0.08763	0.00573	1.589	0.17301	2.23014	24.4833	54.6011	indoleamine-pyrrole 2,3 dioxygenase
209656_s_at	2.76	0.86834	0.08805	0.00579	1.563	0.17877	1.57909	1654.71	2612.93	transmembrane 4 superfamily member 10
204858_s_at	2.759	0.86834	0.08805	0.0058	3.707	0.01389	2.08582	149.131	311.059	endothelial cell growth factor 1 (platelet-derived)
205466_s_at	2.755	0.87747	0.08805	0.00587	2.504	0.0542	1.65735	3403.96	5641.54	heparan sulfate (glucosamine) 3-O-sulfotransferase 1
217775_s_at	2.747	0.89426	0.08805	0.00602	4.919	0.0044	1.67588	1330.54	2229.82	retinol dehydrogenase 11 (all-trans and 9-cis)
210517_s_at	2.746	0.89459	0.08888	0.00604	1.45	0.20681	2.05345	458.214	940.919	A kinase (PRKA) anchor protein (gravin) 12
242944_at	2.739	0.90973	0.09078	0.00616	0.607	0.57055	1.44335	387.778	559.699	hypothetical protein MGC14128
212268_at	2.734	0.92009	0.09347	0.00626	1.962	0.10697	1.43731	7747.74	11135.9	serine (or cysteine) proteinase inhibitor, clade B (ovalbumin), member 1
209301_at	2.727	0.9366	0.09428	0.00639	3.037	0.02883	2.9727	156.82	466.18	carbonic anhydrase II
214088_s_at	2.724	0.93931	0.09483	0.00644	7.172	0.00082	1.73967	874.563	1521.45	fucosyltransferase 3 (galactoside 3(4)-L-fucosyltransferase, Lewis blood group included)
1554008_at	2.718	0.95248	0.09568	0.00656	3.825	0.01232	3.74462	20.6846	77.4558	oncostatin M receptor
205042_at	2.718	0.95248	0.09568	0.00657	2.532	0.05241	1.7531	1406.89	2466.42	glucosamine (UDP-N-acetyl)-2-epimerase/N-acetylmannosamine kinase
217995_at	2.711	0.9687	0.09568	0.0067	7.326	0.00074	1.5548	2174.81	3381.4	sulfide quinone reductase-like (yeast)
212236_x_at	2.711	0.9687	0.09568	0.00671	1.836	0.12581	1.27217	12378.6	15747.6	keratin 17
209185_s_at	2.708	0.97308	0.09568	0.00677	2.765	0.0396	1.63606	863.518	1412.76	insulin receptor substrate 2
224615_x_at	2.699	0.99303	0.09571	0.00696	3.925	0.01113	1.52747	1494.62	2282.99	histocompatibility (minor) 13
203570_at	2.697	0.9962	0.09571	0.00701	2.242	0.07499	1.8099	604.758	1094.55	lysyl oxidase-like 1
218507_at	2.696	0.9962	0.09571	0.00701	4.037	0.00995	2.11565	614.142	1299.31	hypoxia-inducible protein 2
210118_s_at	2.687	1	0.09571	0.00722	1.359	0.23226	4.37473	30.8639	135.021	interleukin 1, alpha
202022_at	2.685	1	0.09573	0.00726	3.635	0.01498	2.41027	453.351	1092.7	aldolase C, fructose-bisphosphate
209604_s_at	2.685	1	0.09599	0.00726	0.384	0.71687	1.38151	198.499	274.229	GATA binding protein 3
212531_at	2.677	1	0.09727	0.00742	2.671	0.04428	1.44874	24714.4	35804.8	lipocalin 2 (oncogene 24p3)
222693_at	2.667	1	0.09804	0.00765	1.321	0.24381	1.49106	1357.19	2023.65	fibronectin type III domain containing 3B
226051_at	2.657	1	0.09928	0.00789	4.001	0.01032	2.01822	669.241	1350.68	selenoprotein M
217678_at	2.652	1	0.10027	0.00801	2.496	0.05475	3.50598	98.8949	346.723	solute carrier family 7, (cationic amino acid transporter, y+ system) member 11
210087_s_at	2.65	1	0.10052	0.00804	0.719	0.50416	1.33981	670.062	897.755	myelin protein zero-like 1
202245_at	2.649	1	0.10076	0.00808	3.232	0.02316	1.80395	867.817	1565.5	lanosterol synthase (2,3-oxidosqualene-lanosterol cyclase)
200935_at	2.643	1	0.10099	0.00823	0.774	0.47399	1.30245	1251.29	1629.74	calreticulin
206884_s_at	2.642	1	0.10099	0.00825	2.786	0.03861	1.60241	911.977	1461.37	sciellin
207076_s_at	2.638	1	0.10172	0.00833	3.734	0.01352	1.42621	6307.76	8996.21	argininosuccinate synthetase
219825_at	2.635	1	0.10268	0.00842	2.304	0.06943	4.27654	11.4392	48.9202	cytochrome P450, family 26, subfamily B, polypeptide 1
213562_s_at	2.634	1	0.10268	0.00843	0.762	0.4802	1.38208	763.623	1055.39	squalene epoxidase
201849_at	2.619	1	0.1036	0.00882	2.706	0.04247	1.41192	2718.64	3838.5	BCL2/adenovirus E1B 19kDa interacting protein 3
242649_x_at	2.618	1	0.1036	0.00884	2.009	0.10077	4.4434	28.1333	125.007	Chromosome 15 open reading frame 21
202200_s_at	2.616	1	0.1036	0.0089	4.253	0.00807	1.51107	1333.96	2015.71	SFRS protein kinase 1
221009_s_at	2.612	1	0.10431	0.00901	4.25	0.00809	3.40843	43.3568	147.778	angiopoietin-like 4
1564494_s_at	2.594	1	0.10907	0.00948	0.459	0.66531	1.14608	8292.67	9504.02	procollagen-proline, 2-oxoglutarate 4-dioxygenase (proline 4-hydroxylase), beta polypeptide (protein disulfide isomerase; thyroid hormone binding protein p55)
200737_at	2.59	1	0.10987	0.00959	2.712	0.04217	1.59675	4109.18	6561.32	phosphoglycerate kinase 1
204686_at	2.59	1	0.10987	0.0096	4.2	0.00849	1.88021	1291.17	2427.68	insulin receptor substrate 1
202628_s_at	2.59	1	0.10987	0.0096	0.495	0.64131	1.53645	390.811	600.46	serine (or cysteine) proteinase inhibitor, clade E (nexin, plasminogen activator inhibitor type 1), member 1
201324_at	2.588	1	0.10987	0.00966	1.167	0.29569	1.63805	794.902	1302.09	epithelial membrane protein 1
238017_at	2.587	1	0.10987	0.00967	2.52	0.05315	1.70349	1599.9	2725.42	epidermal retinal dehydrogenase 2
203828_s_at	2.581	1	0.11096	0.00985	6.308	0.00147	3.20046	24.8856	79.6453	interleukin 32 /// interleukin 32
201128_s_at	2.575	1	0.11197	0.01001	2.485	0.05553	1.34844	5455.05	7355.83	ATP citrate lyase
203744_at	2.573	1	0.11197	0.01007	6.939	0.00095	1.59912	2482.37	3969.61	high-mobility group box 3
212281_s_at	2.571	1	0.11237	0.01014	4.192	0.00856	2.09378	257.813	539.805	hypothetical protein MAC30
220122_at	2.569	1	0.11237	0.0102	2.106	0.08911	2.34687	67.1305	157.547	multiple C2-domains with two transmembrane regions 1
203836_s_at	2.563	1	0.11362	0.01037	3.452	0.0182	1.59889	668.091	1068.2	mitogen-activated protein kinase kinase kinase 5
208616_s_at	2.561	1	0.11362	0.01043	6.995	0.00092	1.38937	9911.42	13770.7	protein tyrosine phosphatase type IVA, member 2
1553132_a_at	2.551	1	0.11763	0.01076	0.768	0.47736	1.20179	2875.79	3456.1	membrane targeting (tandem) C2 domain containing 1
205157_s_at	2.54	1	0.11908	0.01109	1.048	0.34246	1.27614	17753.8	22656.4	keratin 17
227345_at	2.539	1	0.11908	0.01113	3.069	0.02781	2.13297	600.245	1280.3	tumor necrosis factor receptor superfamily, member 10d, decoy with truncated death domain
202540_s_at	2.535	1	0.11908	0.01124	3.188	0.02432	1.57941	1956.4	3089.95	3-hydroxy-3-methylglutaryl-Coenzyme A reductase
226384_at	2.528	1	0.12005	0.01146	5.82	0.00212	1.76211	682.03	1201.81	HTPAP protein
214164_x_at	2.523	1	0.12199	0.01164	3.734	0.01351	1.57763	1321.25	2084.44	carbonic anhydrase XII
202855_s_at	2.519	1	0.12277	0.01175	1.761	0.13849	1.7584	1770.02	3112.4	solute carrier family 16 (monocarboxylic acid transporters), member 3
204907_s_at	2.505	1	0.12359	0.01226	1.952	0.1084	2.49464	12.3598	30.8331	B-cell CLL/lymphoma 3
218718_at	2.503	1	0.12359	0.01232	1.156	0.29991	1.34135	1084.85	1455.15	platelet derived growth factor C
212481_s_at	2.501	1	0.12364	0.01238	0.634	0.5542	1.37435	934.452	1284.27	tropomyosin 4
208691_at	2.501	1	0.12364	0.0124	3.013	0.02965	1.71391	3931.39	6738.03	---
202625_at	2.499	1	0.12364	0.01246	5.139	0.00365	1.55119	3062.37	4750.32	V-yes-1 Yamaguchi sarcoma viral related oncogene homolog /// V-yes-1 Yamaguchi sarcoma viral related oncogene homolog
217762_s_at	2.484	1	0.12741	0.013	3.984	0.01048	1.70098	4638.72	7890.38	RAB31, member RAS oncogene family
223839_s_at	2.482	1	0.12756	0.01305	4.756	0.00508	1.99979	876.048	1751.91	---
201883_s_at	2.477	1	0.12872	0.01326	0.642	0.54886	1.72807	237.701	410.765	UDP-Gal:betaGlcNAc beta 1,4- galactosyltransferase, polypeptide 1
216483_s_at	2.471	1	0.12903	0.01347	4.471	0.00657	1.63791	1603.76	2626.82	chromosome 19 open reading frame 10
224657_at	2.471	1	0.12903	0.01348	2.488	0.05527	1.83999	965.764	1777	mitogen-inducible gene 6
1554179_s_at	2.469	1	0.12903	0.01353	3.637	0.01496	2.04846	260.906	534.456	Ly6/neurotoxin 1
201028_s_at	2.465	1	0.13003	0.01371	1.625	0.16499	1.48021	2526.74	3740.1	CD99 antigen
203233_at	2.459	1	0.13157	0.01395	5.789	0.00217	1.97164	498.433	982.731	interleukin 4 receptor
227068_at	2.452	1	0.13339	0.01419	2.811	0.03752	1.52354	2468.99	3761.61	phosphoglycerate kinase 1
211429_s_at	2.449	1	0.13437	0.01434	3.543	0.01651	1.94462	360.803	701.623	serine (or cysteine) proteinase inhibitor, clade A (alpha-1 antiproteinase, antitrypsin), member 1
210367_s_at	2.439	1	0.13711	0.01474	3.654	0.01469	1.75763	886.219	1557.64	prostaglandin E synthase
205281_s_at	2.435	1	0.13711	0.0149	2.866	0.03515	1.50983	847.338	1279.34	phosphatidylinositol glycan, class A (paroxysmal nocturnal hemoglobinuria) /// phosphatidylinositol glycan, class A (paroxysmal nocturnal hemoglobinuria)
205767_at	2.434	1	0.13711	0.01494	3.353	0.02026	3.55471	33.6274	119.535	epiregulin
202479_s_at	2.429	1	0.13711	0.01512	1.497	0.19453	2.00772	122.475	245.895	tribbles homolog 2 (Drosophila)
203484_at	2.428	1	0.13711	0.01519	3.562	0.01618	1.3343	8749.95	11675	Sec61 gamma subunit
223623_at	2.424	1	0.13711	0.01537	0.165	0.87515	1.0791	2705.55	2919.55	esophageal cancer related gene 4 protein
202478_at	2.42	1	0.13711	0.01554	5.43	0.00287	1.94464	598.865	1164.58	tribbles homolog 2 (Drosophila)
1567628_at	2.419	1	0.13711	0.01554	0.029	0.97818	1.01968	1531.16	1561.28	CD74 antigen (invariant polypeptide of major histocompatibility complex, class II antigen-associated)
202856_s_at	2.419	1	0.13711	0.01555	2.133	0.08604	1.75431	3245.06	5692.84	transmembrane protein 4
203841_x_at	2.417	1	0.13711	0.01567	0.106	0.91999	1.06712	299.906	320.035	microtubule-associated protein, RP/EB family, member 3
209723_at	2.411	1	0.13711	0.01592	1.319	0.24433	2.08956	4.32496	9.03725	serine (or cysteine) proteinase inhibitor, clade B (ovalbumin), member 9
232231_at	2.408	1	0.13711	0.01603	0.985	0.37006	1.35496	768.745	1041.62	Runt-related transcription factor 2
241990_at	2.401	1	0.13711	0.01633	5.034	0.00399	1.66555	1708.72	2845.95	ras homolog gene family, member V
221766_s_at	2.401	1	0.13711	0.01635	2.883	0.03448	1.6076	1387.64	2230.78	family with sequence similarity 46, member A
208894_at	2.4	1	0.13711	0.01638	0.943	0.38895	1.2618	3148.6	3972.9	major histocompatibility complex, class II, DR alpha /// major histocompatibility complex, class II, DR alpha
201063_at	2.399	1	0.13711	0.01644	3.937	0.011	1.56408	1592.31	2490.51	reticulocalbin 1, EF-hand calcium binding domain
223299_at	2.397	1	0.13711	0.01654	7.732	0.00058	1.70823	1467.05	2506.05	SEC11-like 3 (S. cerevisiae)
225008_at	2.389	1	0.1372	0.01689	2.641	0.04591	1.4645	1302.41	1907.38	Hypothetical protein MGC34646
201325_s_at	2.386	1	0.1372	0.01701	1.207	0.28126	1.67764	301.184	505.279	epithelial membrane protein 1
209803_s_at	2.383	1	0.13744	0.01719	1.319	0.24434	1.32311	6457.92	8544.56	pleckstrin homology-like domain, family A, member 2
221739_at	2.382	1	0.13744	0.01721	5.038	0.00397	1.65949	1118.62	1856.35	chromosome 19 open reading frame 10
202375_at	2.376	1	0.13861	0.01752	2.048	0.09595	1.43269	1581.24	2265.42	SEC24 related gene family, member D (S. cerevisiae)
201884_at	2.371	1	0.13861	0.01775	1.704	0.14909	1.6593	5006.58	8307.41	carcinoembryonic antigen-related cell adhesion molecule 5
1556499_s_at	2.37	1	0.13861	0.0178	1.318	0.24457	1.58366	427.348	676.775	collagen, type I, alpha 1
201127_s_at	2.368	1	0.13861	0.01787	1.451	0.20644	1.37842	1560.37	2150.85	ATP citrate lyase
201118_at	2.368	1	0.13861	0.01787	1.119	0.31388	1.20578	6130.84	7392.46	phosphogluconate dehydrogenase /// phosphogluconate dehydrogenase
207535_s_at	2.368	1	0.13861	0.01788	2.13	0.08644	2.91322	44.583	129.88	nuclear factor of kappa light polypeptide gene enhancer in B-cells 2 (p49/p100)
218960_at	2.362	1	0.13982	0.0182	6.678	0.00114	1.44459	7934.4	11461.9	transmembrane protease, serine 4
203373_at	2.359	1	0.13982	0.01831	2.508	0.05395	2.96058	58.4464	173.035	suppressor of cytokine signaling 2
224963_at	2.351	1	0.14252	0.01875	2.585	0.0491	2.10917	195.631	412.619	solute carrier family 26 (sulfate transporter), member 2
201761_at	2.339	1	0.14548	0.01931	2.029	0.09819	1.40727	3157	4442.74	methylenetetrahydrofolate dehydrogenase (NADP+ dependent) 2, methenyltetrahydrofolate cyclohydrolase
203417_at	2.338	1	0.14548	0.01937	0.841	0.43871	1.55126	352.879	547.405	microfibrillar-associated protein 2
222750_s_at	2.338	1	0.14548	0.01941	4.84	0.00471	1.56287	2568.1	4013.61	steroid 5 alpha-reductase 2-like
201243_s_at	2.336	1	0.14548	0.01951	1.231	0.27291	1.18596	19554.6	23191.1	ATPase, Na+/K+ transporting, beta 1 polypeptide
227188_at	2.334	1	0.14548	0.01961	3.253	0.02262	1.60958	1291.66	2079.03	chromosome 21 open reading frame 63
214404_x_at	2.332	1	0.14548	0.01968	7.501	0.00067	2.32951	221.421	515.803	SAM pointed domain containing ets transcription factor
225803_at	2.33	1	0.14589	0.01983	1.487	0.1971	1.52773	945.818	1444.95	F-box protein 32
217110_s_at	2.326	1	0.14589	0.02002	1.448	0.20718	1.519	2113.81	3210.89	mucin 4, tracheobronchial
201428_at	2.326	1	0.14589	0.02004	1.548	0.18227	1.30719	4476.87	5852.14	claudin 4
211676_s_at	2.324	1	0.14589	0.0201	2.329	0.06733	1.45954	4194.11	6121.47	interferon gamma receptor 1 /// interferon gamma receptor 1
207836_s_at	2.323	1	0.14589	0.0202	2.611	0.04763	1.54427	1292.36	1995.75	RNA binding protein with multiple splicing
222385_x_at	2.316	1	0.14635	0.02055	0.027	0.9797	1.01117	1073.56	1085.55	Sec61 alpha 1 subunit (S. cerevisiae)
210413_x_at	2.316	1	0.14654	0.02057	4.703	0.00532	1.33467	15274	20385.7	serine (or cysteine) proteinase inhibitor, clade B (ovalbumin), member 4
205011_at	2.309	1	0.14772	0.02096	3.368	0.01994	1.59273	1589.98	2532.41	loss of heterozygosity, 11, chromosomal region 2, gene A
226452_at	2.308	1	0.148	0.021	1.887	0.11786	3.02664	89.5798	271.125	pyruvate dehydrogenase kinase, isoenzyme 1
202241_at	2.306	1	0.148	0.02111	5.759	0.00222	1.63071	785.433	1280.81	tribbles homolog 1 (Drosophila)
204597_x_at	2.297	1	0.14944	0.02164	1.533	0.18594	3.47654	23.7921	82.7144	stanniocalcin 1
200733_s_at	2.294	1	0.14944	0.02178	1.26	0.26326	1.26523	8464.66	10709.8	protein tyrosine phosphatase type IVA, member 1
217776_at	2.293	1	0.14944	0.02183	3.566	0.01611	1.44022	3360.44	4839.76	retinol dehydrogenase 11 (all-trans and 9-cis)
214070_s_at	2.291	1	0.15096	0.02198	1.262	0.26255	1.48034	1269.33	1879.04	ATPase, Class V, type 10B
213258_at	2.286	1	0.15327	0.02223	2.34	0.06638	1.64267	528.851	868.728	Tissue factor pathway inhibitor (lipoprotein-associated coagulation inhibitor)
1561691_at	2.286	1	0.15335	0.02227	3.306	0.02133	1.77287	400.128	709.372	hypothetical protein LOC285735
215760_s_at	2.284	1	0.15343	0.02235	2.466	0.05679	1.70817	280.761	479.587	---
209365_s_at	2.277	1	0.15749	0.0228	0.367	0.72855	1.28751	279.247	359.534	extracellular matrix protein 1
209218_at	2.276	1	0.15749	0.02284	2.421	0.06007	1.45139	4889.7	7096.86	squalene epoxidase
204256_at	2.268	1	0.15905	0.02331	3.236	0.02305	1.88071	370.604	697	ELOVL family member 6, elongation of long chain fatty acids (FEN1/Elo2, SUR4/Elo3-like, yeast)
202435_s_at	2.267	1	0.15912	0.02336	0.339	0.74835	1.12434	1389.68	1562.47	cytochrome P450, family 1, subfamily B, polypeptide 1
240303_at	2.26	1	0.1613	0.02379	4.723	0.00523	1.49668	5250.31	7858.06	CDNA FLJ44282 fis, clone TRACH2003516
210041_s_at	2.259	1	0.16206	0.0239	1.856	0.12253	1.4335	655.787	940.068	phosphoglucomutase 3
223454_at	2.254	1	0.16359	0.02422	2.146	0.0847	1.39507	1705.33	2379.04	chemokine (C-X-C motif) ligand 16
234312_s_at	2.251	1	0.16406	0.02441	5.332	0.00311	1.77244	739.79	1311.23	acetyl-Coenzyme A synthetase 2 (ADP forming)
216243_s_at	2.249	1	0.16453	0.02448	3.283	0.02188	1.61245	1783.51	2875.81	interleukin 1 receptor antagonist
213006_at	2.249	1	0.16453	0.02451	3.493	0.01742	2.63084	22.5522	59.3313	CCAAT/enhancer binding protein (C/EBP), delta
201170_s_at	2.248	1	0.1647	0.0246	1.709	0.14816	1.43122	8158.15	11676.1	basic helix-loop-helix domain containing, class B, 2
205844_at	2.248	1	0.1647	0.02461	2.943	0.03215	3.08719	12.3337	38.0764	vanin 1 /// vanin 1
207847_s_at	2.247	1	0.1647	0.02463	2.842	0.03618	1.44793	11486.7	16631.9	mucin 1, transmembrane
200738_s_at	2.247	1	0.16545	0.02466	3.458	0.01808	1.30415	18850.5	24583.9	phosphoglycerate kinase 1
227529_s_at	2.245	1	0.1659	0.0248	0.872	0.42297	2.37552	26.2347	62.3211	A kinase (PRKA) anchor protein (gravin) 12
200600_at	2.24	1	0.16675	0.02508	1.522	0.1884	1.45423	2609.1	3794.23	moesin
204863_s_at	2.24	1	0.16681	0.02511	0.862	0.42794	1.4999	308.583	462.844	interleukin 6 signal transducer (gp130, oncostatin M receptor)
210868_s_at	2.232	1	0.17003	0.02561	1.516	0.18993	2.17913	63.4288	138.22	ELOVL family member 6, elongation of long chain fatty acids (FEN1/Elo2, SUR4/Elo3-like, yeast)
204881_s_at	2.221	1	0.17136	0.02633	3.312	0.02119	1.46574	5403.39	7919.96	UDP-glucose ceramide glucosyltransferase
213043_s_at	2.22	1	0.17136	0.02642	2.927	0.03276	2.08503	544.817	1135.96	thyroid hormone receptor associated protein 4
222411_s_at	2.217	1	0.17208	0.02665	6.793	0.00105	1.53753	2824.68	4343.02	signal sequence receptor, gamma (translocon-associated protein gamma)
221881_s_at	2.216	1	0.17212	0.02667	0.325	0.75836	1.34149	276.701	371.192	chloride intracellular channel 4
213603_s_at	2.214	1	0.17283	0.02686	1.302	0.24959	1.47168	619.484	911.685	ras-related C3 botulinum toxin substrate 2 (rho family, small GTP binding protein Rac2)
211695_x_at	2.212	1	0.17321	0.02697	5.709	0.0023	1.62655	1042.77	1696.11	mucin 1, transmembrane /// mucin 1, transmembrane
201204_s_at	2.206	1	0.17474	0.02735	2.891	0.03413	1.62615	3080.34	5009.09	Ribosome binding protein 1 homolog 180kDa (dog)
209498_at	2.206	1	0.17474	0.02742	2.282	0.07137	3.0038	103.758	311.67	carcinoembryonic antigen-related cell adhesion molecule 1 (biliary glycoprotein)
217763_s_at	2.204	1	0.1761	0.02753	4.14	0.009	1.65391	1827.73	3022.9	RAB31, member RAS oncogene family
221781_s_at	2.203	1	0.17613	0.02759	0.697	0.51709	1.23833	1409.27	1745.15	DnaJ (Hsp40) homolog, subfamily C, member 10
200625_s_at	2.2	1	0.17683	0.02779	2.655	0.04516	1.28619	6856.01	8818.12	CAP, adenylate cyclase-associated protein 1 (yeast)
231775_at	2.199	1	0.17752	0.02787	3.078	0.02753	1.86531	292.505	545.613	tumor necrosis factor receptor superfamily, member 10a
202223_at	2.195	1	0.17952	0.02814	6.065	0.00176	1.50912	1249.73	1886	integral membrane protein 1
208308_s_at	2.194	1	0.18021	0.02823	4.98	0.00417	1.37628	5872.85	8082.69	glucose phosphate isomerase
209278_s_at	2.193	1	0.18056	0.02832	0.471	0.65761	1.2886	1590.5	2049.52	tissue factor pathway inhibitor 2
204924_at	2.19	1	0.18255	0.02852	6.36	0.00142	1.97843	186.707	369.386	toll-like receptor 2
217109_at	2.183	1	0.18486	0.02904	1.395	0.22175	1.37469	5115.72	7032.53	mucin 4, tracheobronchial
201096_s_at	2.182	1	0.18488	0.02907	1.544	0.18325	1.24102	4604.06	5713.72	ADP-ribosylation factor 4
226348_at	2.181	1	0.18538	0.02917	2.638	0.04611	1.90943	226.745	432.954	---
200599_s_at	2.177	1	0.18538	0.02946	3.798	0.01265	1.33379	12211.2	16287.1	tumor rejection antigen (gp96) 1
224209_s_at	2.176	1	0.18538	0.02957	1.841	0.12494	1.44729	3661.9	5299.82	guanine deaminase
206576_s_at	2.173	1	0.18538	0.0298	0.752	0.48605	1.56254	49.1534	76.804	carcinoembryonic antigen-related cell adhesion molecule 1 (biliary glycoprotein)
219202_at	2.168	1	0.18764	0.03019	4.348	0.00737	1.76809	427.912	756.586	---
209135_at	2.165	1	0.18862	0.03042	2.928	0.0327	1.37342	8979.1	12332.1	aspartate beta-hydroxylase
200632_s_at	2.163	1	0.18863	0.03052	2.257	0.07365	1.49182	6081.08	9071.89	N-myc downstream regulated gene 1
202557_at	2.163	1	0.18865	0.03054	3.661	0.01459	1.66636	545.565	909.108	stress 70 protein chaperone, microsome-associated, 60kDa
216010_x_at	2.16	1	0.18995	0.03074	1.981	0.10441	1.47969	553.517	819.033	fucosyltransferase 3 (galactoside 3(4)-L-fucosyltransferase, Lewis blood group included)
204037_at	2.159	1	0.1903	0.03083	2.521	0.0531	1.64263	402.355	660.919	endothelial differentiation, lysophosphatidic acid G-protein-coupled receptor, 2
216548_x_at	2.158	1	0.1903	0.03095	5.153	0.0036	1.66385	566.476	942.528	---
218996_at	2.153	1	0.19191	0.03131	1.333	0.24003	1.48188	326.88	484.399	TCF3 (E2A) fusion partner (in childhood Leukemia)
222446_s_at	2.152	1	0.19317	0.03143	2.084	0.09156	1.35081	1185.67	1601.63	beta-site APP-cleaving enzyme 2
200917_s_at	2.149	1	0.19323	0.0316	-0.058	0.95612	0.96551	484.845	468.122	signal recognition particle receptor ('docking protein')
218358_at	2.147	1	0.19323	0.03179	4.528	0.00624	1.65006	1354.68	2235.29	---
223449_at	2.147	1	0.19323	0.03179	4.86	0.00463	2.35234	98.1468	230.875	sema domain, transmembrane domain (TM), and cytoplasmic domain, (semaphorin) 6A
204595_s_at	2.147	1	0.19323	0.03183	3.788	0.01279	3.30093	45.847	151.338	stanniocalcin 1
203851_at	2.145	1	0.19324	0.03192	0.569	0.59419	1.15217	4199.94	4839.05	insulin-like growth factor binding protein 6
216565_x_at	2.14	1	0.19448	0.03233	6.274	0.00151	1.66048	669.812	1112.21	similar to Interferon-induced transmembrane protein 3 (Interferon-inducible protein 1-8U)
226325_at	2.14	1	0.19448	0.03238	1.413	0.2167	1.46913	1679.81	2467.85	adenylosuccinate synthase like 1
222753_s_at	2.134	1	0.19603	0.03285	7.23	0.00079	1.7198	425.741	732.191	signal peptidase complex subunit 3 homolog (S. cerevisiae)
238949_at	2.127	1	0.19604	0.03339	3.258	0.0225	2.20688	243.312	536.959	---
207030_s_at	2.124	1	0.19665	0.03368	1.777	0.1358	1.75555	681.31	1196.08	cysteine and glycine-rich protein 2
218205_s_at	2.124	1	0.19665	0.03368	2.348	0.06572	1.34505	13364	17975.2	MAP kinase interacting serine/threonine kinase 2
203426_s_at	2.122	1	0.19666	0.03384	1.809	0.13023	1.794	256.414	460.006	insulin-like growth factor binding protein 5
225503_at	2.12	1	0.19696	0.03402	1.671	0.15554	1.70229	218.85	372.548	dehydrogenase/reductase (SDR family) X-linked
209631_s_at	2.119	1	0.19787	0.03413	3.032	0.029	1.70103	515.672	877.171	G protein-coupled receptor 37 (endothelin receptor type B-like)
208783_s_at	2.116	1	0.19848	0.03432	0.905	0.40692	1.19008	11655.5	13870.9	membrane cofactor protein (CD46, trophoblast-lymphocyte cross-reactive antigen)
210735_s_at	2.114	1	0.19907	0.03449	2.344	0.06609	1.63616	1138.31	1862.46	carbonic anhydrase XII
236449_at	2.111	1	0.19907	0.03473	9.521	0.00022	2.21467	84.0919	186.235	Cystatin B (stefin B)
204363_at	2.111	1	0.19907	0.03478	1.665	0.15673	1.3837	14583.2	20178.7	coagulation factor III (thromboplastin, tissue factor)
202052_s_at	2.11	1	0.19907	0.03485	1.709	0.1481	1.38741	2407.47	3340.15	retinoic acid induced 14
225583_at	2.109	1	0.19907	0.0349	3.378	0.01973	1.49003	1527.19	2275.57	UDP-glucuronate decarboxylase 1
206584_at	2.109	1	0.19907	0.03495	2.102	0.08952	2.58184	15.3274	39.5728	lymphocyte antigen 96
200615_s_at	2.107	1	0.19965	0.03511	1.434	0.21096	1.57045	538.056	844.989	adaptor-related protein complex 2, beta 1 subunit
117_at	2.106	1	0.19965	0.03517	3.698	0.01403	2.67895	7.41398	19.8617	heat shock 70kDa protein 6 (HSP70B')
241031_at	2.106	1	0.19965	0.0352	3.511	0.01708	2.73409	31.4103	85.8787	Nuclear localized factor 1
209395_at	2.106	1	0.19965	0.03521	1.165	0.29661	2.52257	15.6572	39.4964	chitinase 3-like 1 (cartilage glycoprotein-39)
221765_at	2.105	1	0.20052	0.0353	1.721	0.14593	1.42148	1553.58	2208.39	UDP-glucose ceramide glucosyltransferase
225316_at	2.099	1	0.20109	0.03584	3.51	0.0171	1.88409	304.397	573.511	hypothetical protein FLJ14490
215446_s_at	2.098	1	0.20109	0.03595	1.485	0.19761	1.70452	430.192	733.27	lysyl oxidase
223217_s_at	2.097	1	0.20109	0.03596	2.573	0.04983	1.75871	847.086	1489.78	nuclear factor of kappa light polypeptide gene enhancer in B-cells inhibitor, zeta
202727_s_at	2.094	1	0.20197	0.03624	3.304	0.02138	1.38179	10781.4	14897.6	interferon gamma receptor 1
212902_at	2.093	1	0.20282	0.03636	3.617	0.01526	1.72724	468.154	808.614	SEC24 related gene family, member A (S. cerevisiae)
201029_s_at	2.093	1	0.20282	0.03637	2.355	0.06516	1.50914	3721.6	5616.43	CD99 antigen
214779_s_at	2.092	1	0.20282	0.03645	2.909	0.03343	1.3858	1797.18	2490.53	RUN and TBC1 domain containing 3
204328_at	2.088	1	0.2033	0.0368	4.981	0.00417	1.83538	319.938	587.209	epidermodysplasia verruciformis 1
212099_at	2.087	1	0.2033	0.03689	1.357	0.23296	1.62528	1442.98	2345.25	ras homolog gene family, member B
222904_s_at	2.084	1	0.2033	0.03713	2.265	0.07285	1.29885	7654.69	9942.32	transmembrane channel-like 5
225520_at	2.084	1	0.2033	0.03715	1.748	0.14097	1.46576	371.597	544.672	methylenetetrahydrofolate dehydrogenase (NADP+ dependent) 1-like
209808_x_at	2.084	1	0.2033	0.03719	2.462	0.05711	2.08033	57.2919	119.186	inhibitor of growth family, member 1
201506_at	2.082	1	0.2033	0.0373	1.525	0.18781	1.32006	5685.9	7505.73	transforming growth factor, beta-induced, 68kDa
201037_at	2.081	1	0.2033	0.03745	2.071	0.09317	1.70894	3277.98	5601.88	phosphofructokinase, platelet
221566_s_at	2.08	1	0.2033	0.03751	5.073	0.00386	2.03146	121.1	246.01	nucleolar protein 3 (apoptosis repressor with CARD domain)
1552256_a_at	2.079	1	0.2033	0.03761	2.619	0.04716	2.16437	108.257	234.308	scavenger receptor class B, member 1
205376_at	2.076	1	0.20472	0.03789	1.421	0.21443	1.66301	650.86	1082.39	inositol polyphosphate-4-phosphatase, type II, 105kDa
207543_s_at	2.073	1	0.20584	0.0382	3.203	0.02392	1.45856	4224.59	6161.84	procollagen-proline, 2-oxoglutarate 4-dioxygenase (proline 4-hydroxylase), alpha polypeptide I
227961_at	2.071	1	0.20668	0.03834	1.765	0.13779	1.29067	3712.87	4792.09	Cathepsin B
203294_s_at	2.07	1	0.20809	0.03849	-0.422	0.69035	0.64428	587.563	378.555	lectin, mannose-binding, 1
226077_at	2.065	1	0.20944	0.03888	5.189	0.0035	1.37519	9652.99	13274.7	hypothetical protein FLJ31951
226725_at	2.065	1	0.20944	0.03891	3.566	0.01612	1.50177	1645.82	2471.64	Transcribed locus
228486_at	2.065	1	0.20944	0.03896	1.257	0.26424	1.79753	12.4599	22.3971	CDW92 antigen
219429_at	2.063	1	0.20997	0.03916	1.262	0.26274	1.35135	1089.85	1472.77	fatty acid 2-hydroxylase
208689_s_at	2.052	1	0.21688	0.04021	2.107	0.08891	1.25253	6698.96	8390.64	ribophorin II
210512_s_at	2.051	1	0.21688	0.04025	1.589	0.17285	1.58874	1854.06	2945.61	vascular endothelial growth factor
200730_s_at	2.049	1	0.21769	0.04041	0.264	0.80198	1.10702	3269.65	3619.57	protein tyrosine phosphatase type IVA, member 1
202023_at	2.049	1	0.21819	0.0405	3.285	0.02183	1.51808	2002.3	3039.65	ephrin-A1
227184_at	2.048	1	0.21819	0.04054	3.331	0.02075	1.66378	427.302	710.938	Transcribed locus, weakly similar to NP_071385.1 chromosome 6 open reading frame 79 [Homo sapiens]
227558_at	2.046	1	0.21866	0.04078	1.457	0.2048	1.38438	1292.34	1789.09	chromobox homolog 4 (Pc class homolog, Drosophila)
214845_s_at	2.045	1	0.21866	0.04083	0.251	0.81202	1.12403	611.965	687.868	calumenin
210754_s_at	2.04	1	0.21962	0.0413	2.288	0.07082	1.35602	2410.64	3268.88	v-yes-1 Yamaguchi sarcoma viral related oncogene homolog
204341_at	2.04	1	0.21962	0.04134	3.358	0.02015	1.40312	4064.28	5702.67	tripartite motif-containing 16
211495_x_at	2.038	1	0.21986	0.04156	1.604	0.16954	1.43008	537.509	768.68	tumor necrosis factor (ligand) superfamily, member 13 /// tumor necrosis factor (ligand) superfamily, member 12-member 13
204034_at	2.032	1	0.22104	0.04219	2.513	0.0536	1.55806	1495.07	2329.4	ethylmalonic encephalopathy 1
211958_at	2.029	1	0.22128	0.04242	1.187	0.28839	2.10819	297.334	626.835	insulin-like growth factor binding protein 5
239468_at	2.027	1	0.22206	0.04271	0.322	0.76043	1.11699	726.087	811.03	chromosome 10 open reading frame 48
214270_s_at	2.022	1	0.22335	0.04315	0.042	0.96786	1.02144	704.576	719.679	microtubule-associated protein, RP/EB family, member 3
222692_s_at	2.02	1	0.22409	0.04342	2.283	0.07124	1.56364	606.66	948.595	fibronectin type III domain containing 3B
204058_at	2.015	1	0.22522	0.04395	1.909	0.11451	1.52714	1749.68	2672.01	Malic enzyme 1, NADP(+)-dependent, cytosolic
223333_s_at	2.014	1	0.22522	0.04396	5.677	0.00236	3.04965	6.2678	19.1146	angiopoietin-like 4
223264_at	2.014	1	0.22522	0.044	3.247	0.02277	1.52078	1398.96	2127.51	mesoderm development candidate 1
202827_s_at	2.014	1	0.22545	0.04406	1.918	0.11322	2.00888	30.309	60.8871	matrix metalloproteinase 14 (membrane-inserted)
209312_x_at	2.008	1	0.22667	0.04467	0.76	0.48151	1.26221	2679.12	3381.62	major histocompatibility complex, class II, DR beta 1 /// major histocompatibility complex, class II, DR beta 1
209499_x_at	2.007	1	0.22717	0.04477	1.613	0.16766	1.44865	582.915	844.442	tumor necrosis factor (ligand) superfamily, member 13 /// tumor necrosis factor (ligand) superfamily, member 12-member 13
204895_x_at	2.002	1	0.22913	0.0453	1.253	0.26552	1.47465	613.254	904.333	mucin 4, tracheobronchial
203164_at	2	1	0.22962	0.04549	5.613	0.00248	1.54187	975.078	1503.44	solute carrier family 33 (acetyl-CoA transporter), member 1
210398_x_at	1.996	1	0.2305	0.04597	3.007	0.02987	1.58077	443.002	700.286	fucosyltransferase 6 (alpha (1,3) fucosyltransferase)
217716_s_at	1.988	1	0.23281	0.04683	4.017	0.01016	1.55025	1339.46	2076.5	Sec61 alpha 1 subunit (S. cerevisiae)
213798_s_at	1.987	1	0.23281	0.04687	2.165	0.08266	1.38791	6387.31	8865.02	CAP, adenylate cyclase-associated protein 1 (yeast)
203372_s_at	1.986	1	0.23281	0.04701	2.323	0.06783	2.77632	19.2398	53.4157	suppressor of cytokine signaling 2
200967_at	1.986	1	0.23281	0.04705	3.769	0.01304	1.34476	14916	20058.5	peptidylprolyl isomerase B (cyclophilin B)
237131_at	1.983	1	0.23366	0.04742	0.209	0.84237	1.11807	1863.71	2083.75	hypothetical protein FLJ36032
202721_s_at	1.982	1	0.23387	0.04752	1.93	0.11153	1.44582	913.945	1321.4	glutamine-fructose-6-phosphate transaminase 1
200656_s_at	1.981	1	0.2346	0.04764	3.06	0.02811	1.36342	10462.4	14264.6	procollagen-proline, 2-oxoglutarate 4-dioxygenase (proline 4-hydroxylase), beta polypeptide (protein disulfide isomerase; thyroid hormone binding protein p55)
207630_s_at	1.976	1	0.23546	0.04819	2.151	0.08412	1.55869	209.158	326.011	cAMP responsive element modulator
212245_at	1.975	1	0.23546	0.04831	1.556	0.18039	1.27419	3435.77	4377.83	multiple coagulation factor deficiency 2
228980_at	1.973	1	0.23546	0.04844	1.444	0.20846	1.26258	1259.36	1590.04	---
210982_s_at	1.973	1	0.23546	0.04845	0.981	0.37178	1.26775	2273.47	2882.2	major histocompatibility complex, class II, DR alpha
209514_s_at	1.971	1	0.23546	0.04872	3.49	0.01748	1.74843	488.092	853.393	RAB27A, member RAS oncogene family
212814_at	1.971	1	0.23546	0.04873	13.646	4e-05	1.56143	789.875	1233.33	KIAA0828 protein
221701_s_at	1.968	1	0.23612	0.04904	2.436	0.05895	1.95319	11.3783	22.224	stimulated by retinoic acid gene 6 homolog (mouse) /// stimulated by retinoic acid gene 6 homolog (mouse)
227717_at	1.964	1	0.23734	0.04956	1.071	0.33306	1.32884	898.907	1194.5	FLJ41603 protein
1553962_s_at	1.961	1	0.23789	0.04987	0.349	0.74119	1.31397	101.385	133.218	ras homolog gene family, member B
222853_at	1.961	1	0.23789	0.04993	1.631	0.16379	1.9498	378.226	737.463	fibronectin leucine rich transmembrane protein 3
200859_x_at	1.96	1	0.23789	0.05	1.364	0.23082	1.36455	826.014	1127.14	filamin A, alpha (actin binding protein 280)

## Sheet: Down SMM 24hr vs PBS 24hr 
probe.name	z.stat	fdr.BH	fdr.RE	z.pv	t.stat	t.pv	fc2power	mexpcon	mexptrt	gene.name
207328_at	-4.696	0.00134	0.01906	0	-3.111	0.02651	0.50626	5384.56	2725.96	arachidonate 15-lipoxygenase
210790_s_at	-4.894	0.00056	0.01882	0	-0.533	0.61685	0.41594	67.3627	28.0186	SAR1a gene homolog 1 (S. cerevisiae)
227061_at	-4.924	0.0005	0.01882	0	-5.338	0.00309	0.13449	583.871	78.526	CDNA FLJ44429 fis, clone UTERU2015653
224568_x_at	-5.103	0.0002	0.01756	0	-2.195	0.07961	0.29323	1561.18	457.788	metastasis associated lung adenocarcinoma transcript 1 (non-coding RNA)
207913_at	-5.245	0.0001	0.01347	0	-2.015	0.09999	0.21644	3420.07	740.241	cytochrome P450, family 2, subfamily F, polypeptide 1
1561368_at	-5.812	1e-05	0.00353	0	-2.601	0.04819	0.13651	829.733	113.267	---
213240_s_at	-6.539	0	0	0	-2.949	0.03191	0.12464	2329.13	290.298	keratin 4
223843_at	-4.374	0.00551	0.0239	1e-05	-6.438	0.00134	0.1775	445.005	78.9883	scavenger receptor class A, member 3
1569675_at	-4.185	0.01114	0.02943	3e-05	-16.173	2e-05	0.13673	267.943	36.637	Homo sapiens, clone IMAGE:4694422, mRNA
201292_at	-4.135	0.01347	0.02977	4e-05	-3.226	0.02331	0.46574	1926.08	897.058	topoisomerase (DNA) II alpha 170kDa
1555097_a_at	-4.044	0.01945	0.03094	5e-05	-4.247	0.00811	0.13803	344.046	47.4871	prostaglandin F receptor (FP)
230493_at	-3.997	0.02276	0.03094	6e-05	-3.304	0.02139	0.15375	276.896	42.5721	WGAR9166
215300_s_at	-3.905	0.0316	0.03094	9e-05	-3.372	0.01985	0.20415	225.948	46.1277	flavin containing monooxygenase 5
223940_x_at	-3.922	0.02965	0.03094	9e-05	-1.838	0.12542	0.47016	3060.44	1438.89	metastasis associated lung adenocarcinoma transcript 1 (non-coding RNA)
226811_at	-3.854	0.03706	0.03237	0.00012	-6.217	0.00157	0.37864	1930.25	730.873	family with sequence similarity 46, member C
235892_at	-3.746	0.05223	0.03639	0.00018	-2.648	0.04555	0.38887	1782.52	693.159	Transcribed locus, weakly similar to NP_060312.1 hypothetical protein FLJ20489 [Homo sapiens]
227475_at	-3.694	0.0628	0.03735	0.00022	-2.554	0.05099	0.5467	3249.39	1776.44	forkhead box Q1
229290_at	-3.648	0.07362	0.03735	0.00026	-1.175	0.29293	0.43111	877.439	378.277	---
218039_at	-3.632	0.07722	0.03735	0.00028	-2.409	0.06092	0.50592	1744.8	882.727	nucleolar and spindle associated protein 1
227510_x_at	-3.617	0.08101	0.03735	0.0003	-1.408	0.21806	0.34661	78.0391	27.049	---
209792_s_at	-3.593	0.08796	0.03855	0.00033	-0.928	0.39619	0.60372	1680.36	1014.47	kallikrein 10
211038_s_at	-3.515	0.11409	0.04043	0.00044	-1.103	0.32038	0.29943	362.055	108.41	hypothetical protein MGC12760 /// hypothetical protein MGC12760
209714_s_at	-3.502	0.11867	0.04043	0.00046	-2.19	0.08012	0.32709	88.7138	29.0178	cyclin-dependent kinase inhibitor 3 (CDK2-associated dual specificity phosphatase)
225062_at	-3.456	0.13769	0.0435	0.00055	-0.787	0.46667	0.43181	204.089	88.1266	Hypothetical gene supported by AL713796
223737_x_at	-3.407	0.16099	0.04696	0.00066	-3.08	0.02745	0.61571	7949.43	4894.57	carbohydrate (N-acetylgalactosamine 4-0) sulfotransferase 9
210096_at	-3.332	0.20074	0.05213	0.00086	-2.477	0.05605	0.70855	23595.5	16718.5	cytochrome P450, family 4, subfamily B, polypeptide 1
224400_s_at	-3.31	0.21403	0.05313	0.00093	-4.145	0.00896	0.60172	9290	5589.98	carbohydrate (N-acetylgalactosamine 4-0) sulfotransferase 9 /// carbohydrate (N-acetylgalactosamine 4-0) sulfotransferase 9
1555497_a_at	-3.295	0.22265	0.0547	0.00099	-3.188	0.02432	0.61715	15510.1	9572.11	cytochrome P450, family 4, subfamily B, polypeptide 1
205470_s_at	-3.266	0.23883	0.05561	0.00109	-1.123	0.31242	0.60632	1081.06	655.467	kallikrein 11
214180_at	-3.267	0.23883	0.05561	0.00109	-1.758	0.13904	0.31668	144.978	45.9121	Mannosidase, alpha, class 1C, member 1
216442_x_at	-3.264	0.23893	0.05561	0.0011	-0.087	0.9343	0.79949	44.2057	35.3421	fibronectin 1
219978_s_at	-3.243	0.25475	0.05561	0.00118	-2.511	0.05378	0.29413	418.29	123.034	nucleolar and spindle associated protein 1
207828_s_at	-3.235	0.2602	0.05561	0.00122	-2.228	0.07635	0.38697	460.741	178.292	centromere protein F, 350/400ka (mitosin)
209387_s_at	-3.206	0.28116	0.05561	0.00135	-0.635	0.55329	0.7775	5630.85	4378.01	transmembrane 4 superfamily member 1
206149_at	-3.2	0.28506	0.05561	0.00138	-0.759	0.48213	0.46171	766.276	353.799	hepatocellular carcinoma antigen gene 520
214710_s_at	-3.156	0.31862	0.05696	0.0016	-3.308	0.02128	0.42206	754.315	318.363	cyclin B1
1556003_a_at	-3.115	0.36189	0.06041	0.00184	-1.072	0.33271	0.62112	5921.1	3677.71	---
224549_x_at	-3.101	0.3782	0.06232	0.00193	-1.358	0.23241	0.53135	1800.9	956.904	---
207761_s_at	-3.092	0.38777	0.06258	0.00199	-5.506	0.0027	0.6744	14723	9929.26	DKFZP586A0522 protein
218883_s_at	-3.086	0.39525	0.06258	0.00203	-1.618	0.16663	0.49479	659.682	326.404	MLF1 interacting protein
224566_at	-3.052	0.43321	0.06654	0.00227	-1.663	0.1573	0.52036	1163.43	605.406	trophoblast-derived noncoding RNA
235852_at	-3.04	0.44508	0.06741	0.00237	-3.895	0.01147	0.3621	566.868	205.266	Stonin 2
218638_s_at	-3.028	0.45634	0.06741	0.00246	-1.355	0.23335	0.66328	5025.56	3333.36	spondin 2, extracellular matrix protein
205044_at	-3.01	0.47627	0.06824	0.00261	-2.081	0.09191	0.64081	4377.72	2805.28	gamma-aminobutyric acid (GABA) A receptor, pi
227719_at	-3.004	0.48409	0.06824	0.00267	-3.84	0.01213	0.35725	692.832	247.515	---
225845_at	-3.002	0.48409	0.06824	0.00268	-2.211	0.07799	0.57609	2030.64	1169.83	HSPC063 protein
202954_at	-2.989	0.5009	0.06844	0.0028	-2.313	0.06862	0.58451	2187.55	1278.65	ubiquitin-conjugating enzyme E2C
207958_at	-2.972	0.52208	0.07074	0.00296	-1.956	0.10784	0.24553	345.464	84.8212	UDP glycosyltransferase 2 family, polypeptide A1
209750_at	-2.97	0.52397	0.07115	0.00298	-1.506	0.1924	0.60074	2004.61	1204.25	nuclear receptor subfamily 1, group D, member 2
214657_s_at	-2.927	0.58767	0.07484	0.00342	-1.257	0.26422	0.39087	125.271	48.965	Trophoblast-derived noncoding RNA
228098_s_at	-2.926	0.58767	0.07484	0.00343	-2.047	0.09607	0.61328	1757.03	1077.55	myosin regulatory light chain interacting protein
208498_s_at	-2.879	0.65782	0.0781	0.00399	-0.284	0.78754	0.734	899.895	660.521	amylase, alpha 2A; pancreatic
225496_s_at	-2.873	0.66743	0.0781	0.00407	-2.575	0.04974	0.65528	3023.71	1981.36	synaptotagmin-like 2
225667_s_at	-2.868	0.67356	0.0781	0.00413	-2.647	0.04559	0.5489	2092.5	1148.56	NSE1
210505_at	-2.864	0.67931	0.0781	0.00419	-1.949	0.10877	0.56828	6299.4	3579.81	alcohol dehydrogenase 7 (class IV), mu or sigma polypeptide
219735_s_at	-2.862	0.68059	0.0781	0.00421	-2.297	0.07004	0.28046	224.842	63.0588	transcription factor CP2-like 1
234675_x_at	-2.861	0.68195	0.0781	0.00423	-1.115	0.31566	0.64874	2623.87	1702.22	CDNA: FLJ23566 fis, clone LNG10880
219918_s_at	-2.821	0.75238	0.08289	0.00479	-2.793	0.03832	0.30178	186.346	56.2351	asp (abnormal spindle)-like, microcephaly associated (Drosophila)
209702_at	-2.816	0.76159	0.08411	0.00486	-2.593	0.04866	0.55076	3264.72	1798.07	fatso
228323_at	-2.791	0.81268	0.08595	0.00526	-2.952	0.03179	0.30559	118.899	36.3343	AF15q14 protein
1555812_a_at	-2.785	0.82363	0.08757	0.00535	-4.562	0.00604	0.41943	853.559	358.01	Rho GDP dissociation inhibitor (GDI) beta
206424_at	-2.772	0.84998	0.08757	0.00558	0.168	0.87286	1.21457	359.945	437.179	cytochrome P450, family 26, subfamily A, polypeptide 1
204734_at	-2.771	0.84998	0.08757	0.0056	-0.424	0.68939	0.82848	14331.3	11873.2	keratin 15
219934_s_at	-2.766	0.85992	0.08757	0.00568	-2.388	0.0625	0.32946	195.484	64.4048	sulfotransferase family 1E, estrogen-preferring, member 1
212206_s_at	-2.765	0.85992	0.08763	0.00569	-4.414	0.00693	0.52573	759.904	399.502	H2A histone family, member V
222958_s_at	-2.75	0.8884	0.08805	0.00596	-4.765	0.00504	0.25346	144.289	36.5712	DEP domain containing 1
212094_at	-2.736	0.91694	0.09266	0.00622	-1.414	0.21662	0.41626	356.868	148.548	paternally expressed 10
218542_at	-2.724	0.93931	0.09483	0.00644	-3.892	0.01151	0.48878	689.1	336.822	chromosome 10 open reading frame 3
218355_at	-2.707	0.97308	0.09568	0.00678	-6.702	0.00112	0.2906	19.5768	5.68899	kinesin family member 4A
240161_s_at	-2.702	0.98782	0.09568	0.0069	-3.477	0.01772	0.6157	9930.47	6114.22	CDC20-like protein
202017_at	-2.685	1	0.09573	0.00725	-3.998	0.01035	0.70562	9045.69	6382.79	epoxide hydrolase 1, microsomal (xenobiotic)
218031_s_at	-2.68	1	0.09702	0.00737	-1.866	0.12097	0.59113	1197.55	707.903	checkpoint suppressor 1
213226_at	-2.679	1	0.09702	0.00738	-2.252	0.07406	0.44718	529.477	236.772	cyclin A2
225656_at	-2.665	1	0.09804	0.0077	-1.591	0.17258	0.43858	604.685	265.2	EF-hand domain (C-terminal) containing 1
231863_at	-2.659	1	0.09804	0.00785	-1.861	0.12179	0.37566	88.763	33.3447	inhibitor of growth family, member 3
228108_at	-2.652	1	0.10027	0.008	-2.722	0.04169	0.52107	835.304	435.252	CDNA clone IMAGE:5263177, partial cds
225219_at	-2.642	1	0.10099	0.00825	-1.614	0.16752	0.676	3452.05	2333.59	SMAD, mothers against DPP homolog 5 (Drosophila)
219493_at	-2.624	1	0.1036	0.00869	-4.344	0.0074	0.26533	54.9481	14.5794	SHC SH2-domain binding protein 1
205259_at	-2.611	1	0.10454	0.00904	-2.67	0.04435	0.48885	1451.67	709.643	nuclear receptor subfamily 3, group C, member 2
206262_at	-2.587	1	0.10987	0.00968	-0.597	0.57637	0.56986	1913.9	1090.66	alcohol dehydrogenase 1C (class I), gamma polypeptide
220812_s_at	-2.581	1	0.11096	0.00985	-3.921	0.01118	0.50976	952.41	485.496	HERV-H LTR-associating 2
219148_at	-2.58	1	0.11096	0.00988	-2.835	0.03645	0.37394	456.114	170.561	PDZ binding kinase
225046_at	-2.578	1	0.11197	0.00993	-0.378	0.72109	0.74909	891.852	668.076	Hypothetical gene supported by AL713796
227722_at	-2.576	1	0.11197	0.00999	-0.98	0.37189	0.5317	481.402	255.959	Ribosomal protein S23
211719_x_at	-2.576	1	0.11197	0.01001	-0.022	0.98365	0.94345	61.9046	58.404	fibronectin 1 /// fibronectin 1
1553185_at	-2.564	1	0.11303	0.01033	-2.472	0.05636	0.45161	396.781	179.191	RAS and EF hand domain containing
204897_at	-2.562	1	0.11362	0.01041	-2.38	0.06313	0.44878	382.004	171.435	prostaglandin E receptor 4 (subtype EP4)
203213_at	-2.55	1	0.11763	0.01077	-4.725	0.00522	0.59946	2709.38	1624.16	cell division cycle 2, G1 to S and G2 to M
219454_at	-2.547	1	0.11908	0.01088	-1.372	0.22845	0.54111	1332.49	721.017	EGF-like-domain, multiple 6
222453_at	-2.539	1	0.11908	0.01113	-3.965	0.01069	0.48032	559.101	268.547	cytochrome b reductase 1
226148_at	-2.539	1	0.11908	0.01113	-2.006	0.10118	0.63054	1703.54	1074.15	HSPC063 protein
202534_x_at	-2.537	1	0.11908	0.01117	-2.694	0.04309	0.53615	1824.97	978.457	dihydrofolate reductase
229341_at	-2.536	1	0.11908	0.01122	-2.67	0.04433	0.40982	259.942	106.53	Transcription factor CP2-like 1
201785_at	-2.529	1	0.12005	0.01143	-1.111	0.3172	0.4367	696.545	304.181	ribonuclease, RNase A family, 1 (pancreatic)
222494_at	-2.527	1	0.12005	0.01152	-2.354	0.06523	0.67122	2241.34	1504.43	checkpoint suppressor 1
218009_s_at	-2.52	1	0.12277	0.01174	-2.601	0.04819	0.52023	646.841	336.508	protein regulator of cytokinesis 1
231875_at	-2.516	1	0.12337	0.01187	-2.667	0.0445	0.54365	556.01	302.273	kinesin family member 21A
212224_at	-2.512	1	0.12354	0.01202	-2.08	0.09204	0.80943	36056.7	29185.2	aldehyde dehydrogenase 1 family, member A1
211922_s_at	-2.503	1	0.12359	0.0123	-2.872	0.03492	0.65391	2193	1434.03	catalase /// catalase
218559_s_at	-2.483	1	0.12741	0.01302	-1.073	0.33211	0.63319	1090.94	690.775	v-maf musculoaponeurotic fibrosarcoma oncogene homolog B (avian)
210052_s_at	-2.48	1	0.12771	0.01315	-3.855	0.01194	0.46556	339.856	158.222	TPX2, microtubule-associated protein homolog (Xenopus laevis)
232914_s_at	-2.472	1	0.12903	0.01342	-2.577	0.04963	0.7158	2976.32	2130.46	synaptotagmin-like 2
1555758_a_at	-2.469	1	0.12903	0.01356	-3.428	0.01868	0.34547	49.3584	17.0519	cyclin-dependent kinase inhibitor 3 (CDK2-associated dual specificity phosphatase)
215034_s_at	-2.459	1	0.13157	0.01392	-0.588	0.58186	0.81685	2450.7	2001.86	transmembrane 4 superfamily member 1
214464_at	-2.44	1	0.13659	0.01469	-1.557	0.1803	0.61193	896.414	548.542	CDC42 binding protein kinase alpha (DMPK-like)
87100_at	-2.439	1	0.13711	0.01474	-2.795	0.0382	0.40712	1565.24	637.249	Abhydrolase domain containing 2
218858_at	-2.433	1	0.13711	0.01499	-6.627	0.00118	0.51716	833.514	431.063	DEP domain containing 6
1556711_at	-2.43	1	0.13711	0.01511	-1.454	0.2057	0.74513	8557.42	6376.35	hypothetical protein FLJ40919
210571_s_at	-2.429	1	0.13711	0.01512	-0.861	0.4287	0.80759	2953.54	2385.24	Cytidine monophosphate-N-acetylneuraminic acid hydroxylase (CMP-N-acetylneuraminate monooxygenase)
225327_at	-2.429	1	0.13711	0.01513	-2.526	0.05277	0.74643	4274.48	3190.61	hypothetical protein FLJ10980
205990_s_at	-2.418	1	0.13711	0.01561	-1.477	0.19959	0.48537	663.505	322.046	wingless-type MMTV integration site family, member 5A
205776_at	-2.415	1	0.13711	0.01574	-2.82	0.03712	0.56581	1123.44	635.65	flavin containing monooxygenase 5
223842_s_at	-2.411	1	0.13711	0.01593	-2.685	0.04356	0.22828	327.674	74.8001	scavenger receptor class A, member 3
218518_at	-2.405	1	0.13711	0.01619	-2.79	0.03846	0.48031	1187.71	570.468	chromosome 5 open reading frame 5
227642_at	-2.4	1	0.13711	0.01638	-1.569	0.17737	0.5923	1015.21	601.31	Transcription factor CP2-like 1
215434_x_at	-2.391	1	0.1372	0.01681	-2.558	0.05075	0.6364	1317.12	838.219	AG1 protein
222608_s_at	-2.386	1	0.1372	0.01701	-2.862	0.0353	0.60348	2172.94	1311.32	anillin, actin binding protein (scraps homolog, Drosophila)
1569582_at	-2.377	1	0.13861	0.01747	-3.553	0.01634	0.34726	182.394	63.3374	similar to esterase/N-deacetylase (EC 3.5.1.-), 50K hepatic - rabbit
234331_s_at	-2.376	1	0.13861	0.01752	-1.224	0.27565	0.59272	1180.01	699.418	NSE1
240422_at	-2.375	1	0.13861	0.01756	-3.767	0.01307	0.4369	535.251	233.85	Transcribed locus
224565_at	-2.37	1	0.13861	0.01778	-0.855	0.43177	0.68223	3263.44	2226.4	trophoblast-derived noncoding RNA
204962_s_at	-2.364	1	0.13982	0.01808	-4.062	0.00971	0.33316	71.9395	23.9674	centromere protein A, 17kDa
203186_s_at	-2.36	1	0.13982	0.01825	-1.852	0.12322	0.72236	4946.01	3572.82	S100 calcium binding protein A4 (calcium protein, calvasculin, metastasin, murine placental homolog)
221815_at	-2.354	1	0.14183	0.01856	-3.331	0.02076	0.59645	2313.65	1379.97	Abhydrolase domain containing 2
220625_s_at	-2.353	1	0.14193	0.01863	-1.361	0.23152	0.47227	232.012	109.572	E74-like factor 5 (ets domain transcription factor)
1555756_a_at	-2.352	1	0.14204	0.01867	-0.968	0.37733	0.41112	71.7571	29.5009	C-type lectin domain family 7, member A
227943_at	-2.349	1	0.14263	0.01883	-2.576	0.04969	0.44242	505.021	223.429	---
238520_at	-2.329	1	0.14589	0.01988	-2.173	0.08179	0.48217	389.813	187.957	Transcriptional regulating factor 1
227525_at	-2.328	1	0.14589	0.01993	-4.691	0.00538	0.54565	1158.55	632.167	glucocorticoid induced transcript 1
1562371_s_at	-2.321	1	0.14589	0.02028	-1.281	0.25629	0.75865	2499.74	1896.43	hypothetical protein MGC26733
212021_s_at	-2.316	1	0.14654	0.02057	-1.783	0.1347	0.33381	74.9865	25.0313	antigen identified by monoclonal antibody Ki-67
202589_at	-2.309	1	0.14782	0.02097	-3.882	0.01161	0.49228	736.733	362.676	thymidylate synthetase
213317_at	-2.301	1	0.14944	0.02137	-1.496	0.19483	0.33398	105.039	35.0806	Chloride intracellular channel 5
244663_at	-2.289	1	0.15104	0.0221	-2.754	0.0401	0.4539	336.923	152.931	Transcribed locus
224851_at	-2.269	1	0.15905	0.02325	-2.126	0.0868	0.64106	1587.24	1017.52	cyclin-dependent kinase 6
220724_at	-2.257	1	0.16248	0.02399	-0.445	0.6749	0.75296	325.62	245.18	hypothetical protein FLJ21511
204444_at	-2.251	1	0.16406	0.02441	-3.328	0.02083	0.39416	345.819	136.306	kinesin family member 11
1553551_s_at	-2.245	1	0.1659	0.02475	-1.45	0.20682	0.84518	37362.5	31577.9	---
201291_s_at	-2.242	1	0.16636	0.02496	-2.45	0.05793	0.50105	1745.48	874.582	topoisomerase (DNA) II alpha 170kDa
213470_s_at	-2.241	1	0.16636	0.02499	-0.895	0.41162	0.74445	798.868	594.72	heterogeneous nuclear ribonucleoprotein H1 (H)
230782_at	-2.239	1	0.16691	0.02516	-2.346	0.06586	0.36806	46.1279	16.9779	CDNA FLJ33419 fis, clone BRACE2019877
41577_at	-2.238	1	0.16691	0.02522	-5.629	0.00245	0.26581	52.6936	14.0064	protein phosphatase 1, regulatory (inhibitor) subunit 16B
225516_at	-2.229	1	0.17007	0.02579	-2.615	0.04736	0.54425	710.984	386.953	solute carrier family 7 (cationic amino acid transporter, y+ system), member 2
243864_at	-2.228	1	0.17046	0.02585	-2.909	0.03345	0.26805	76.8589	20.6022	Glypican 6
204469_at	-2.224	1	0.17136	0.02616	-1.258	0.2638	0.62832	1586.49	996.816	protein tyrosine phosphatase, receptor-type, Z polypeptide 1
202095_s_at	-2.22	1	0.17136	0.02641	-2.109	0.08878	0.4664	27.6043	12.8747	baculoviral IAP repeat-containing 5 (survivin)
202971_s_at	-2.22	1	0.17136	0.02643	-3.065	0.02795	0.59377	523.088	310.592	dual-specificity tyrosine-(Y)-phosphorylation regulated kinase 2
227947_at	-2.21	1	0.17325	0.02712	-3.34	0.02054	0.59093	1655.89	978.512	phosphatase and actin regulator 2
231582_at	-2.207	1	0.17474	0.02732	-6.263	0.00152	0.48839	660.497	322.582	Transcribed locus
201288_at	-2.207	1	0.17474	0.02734	-2.206	0.07847	0.6103	1557.99	950.837	Rho GDP dissociation inhibitor (GDI) beta
1552389_at	-2.18	1	0.18538	0.02928	-4.288	0.0078	0.56596	1354.43	766.554	hypothetical protein FLJ39553
223435_s_at	-2.178	1	0.18538	0.02941	-1.694	0.15109	0.58512	485.815	284.258	protocadherin alpha 9 /// protocadherin alpha subfamily C, 2 /// protocadherin alpha subfamily C, 1 /// protocadherin alpha 13 /// protocadherin alpha 12 /// protocadherin alpha 11 /// protocadherin alpha 10 /// protocadherin alpha 8 /// protocadherin alpha 7 /// protocadherin alpha 6 /// protocadherin alpha 5 /// protocadherin alpha 4 /// protocadherin alpha 3 /// protocadherin alpha 2 /// proto…
206874_s_at	-2.175	1	0.18538	0.02963	-1.174	0.29345	0.71475	1469.98	1050.66	---
209464_at	-2.175	1	0.18538	0.02964	-2.581	0.04936	0.40777	57.5483	23.4664	aurora kinase B
239742_at	-2.173	1	0.18538	0.02977	-0.222	0.83277	0.84351	81.0816	68.3928	Tubby like protein 4
202193_at	-2.162	1	0.18962	0.03065	-1.028	0.35099	0.81109	3662.77	2970.82	LIM domain kinase 2
228033_at	-2.157	1	0.1903	0.031	-2.903	0.03367	0.50919	620.325	315.865	E2F transcription factor 7
208650_s_at	-2.157	1	0.19063	0.03104	-1.968	0.10621	0.74093	42521.1	31505.2	CD24 antigen (small cell lung carcinoma cluster 4 antigen)
225687_at	-2.155	1	0.19127	0.03114	-2.077	0.09237	0.51364	624.62	320.831	chromosome 20 open reading frame 129
204716_at	-2.15	1	0.19318	0.03152	-2.225	0.07663	0.48154	1284.57	618.573	coiled-coil domain containing 6
201841_s_at	-2.149	1	0.19323	0.03164	-1.983	0.10417	0.7829	30160.3	23612.4	heat shock 27kDa protein 1
229506_at	-2.148	1	0.19323	0.03174	-2.983	0.03068	0.41318	181.327	74.9198	CDNA clone IMAGE:5263177, partial cds
204026_s_at	-2.147	1	0.19323	0.03182	-2.466	0.05683	0.56635	1197.43	678.164	ZW10 interactor
226980_at	-2.138	1	0.19511	0.03253	-2.458	0.0574	0.38099	91.7189	34.9442	DEP domain containing 1B
230479_at	-2.125	1	0.19665	0.03361	-2.172	0.08194	0.56485	439.76	248.398	Transcribed locus
226446_at	-2.122	1	0.19666	0.03381	-2.536	0.05213	0.59348	516.3	306.412	hairy and enhancer of split 6 (Drosophila)
207213_s_at	-2.121	1	0.19696	0.03391	-2.473	0.05634	0.34005	23.7007	8.0595	ubiquitin specific protease 2
237395_at	-2.117	1	0.19818	0.03427	-1.512	0.19088	0.3233	30.0807	9.7252	cytochrome P450, family 4, subfamily Z, polypeptide 1
228729_at	-2.112	1	0.19907	0.03468	-2.507	0.05403	0.52558	965.745	507.581	cyclin B1
230560_at	-2.109	1	0.19907	0.03494	-3.286	0.02182	0.42352	42.9454	18.1882	syntaxin binding protein 6 (amisyn)
218755_at	-2.102	1	0.20052	0.03559	-3.168	0.02487	0.4387	485.315	212.908	kinesin family member 20A
228582_x_at	-2.101	1	0.20052	0.03567	-2.066	0.09374	0.44144	10.6652	4.70802	---
1560751_at	-2.101	1	0.20052	0.03568	-0.95	0.38596	0.57519	781.377	449.44	---
204364_s_at	-2.1	1	0.20109	0.03575	-1.062	0.33671	0.59415	771.268	458.247	chromosome 2 open reading frame 23
213998_s_at	-2.089	1	0.2033	0.0367	-2.754	0.0401	0.45151	80.8259	36.4934	DEAD (Asp-Glu-Ala-Asp) box polypeptide 17
235626_at	-2.086	1	0.2033	0.03696	-3.334	0.0207	0.7037	2204.2	1551.09	calcium/calmodulin-dependent protein kinase ID
209949_at	-2.085	1	0.2033	0.03703	-1.429	0.21228	0.56993	608.433	346.764	neutrophil cytosolic factor 2 (65kDa, chronic granulomatous disease, autosomal 2)
227687_at	-2.084	1	0.2033	0.03714	-3.228	0.02325	0.45876	750.302	344.206	hypothetical protein FLJ32915
204641_at	-2.075	1	0.20499	0.03796	-5.428	0.00288	0.63639	1922.42	1223.4	NIMA (never in mitosis gene a)-related kinase 2
213229_at	-2.064	1	0.20944	0.03898	-0.548	0.60727	0.85777	2320.41	1990.38	Dicer1, Dcr-1 homolog (Drosophila)
209642_at	-2.062	1	0.20997	0.03917	-2.993	0.03036	0.46982	219.625	103.183	BUB1 budding uninhibited by benzimidazoles 1 homolog (yeast)
222102_at	-2.059	1	0.21164	0.03948	-2.657	0.04504	0.67164	3025.2	2031.85	glutathione S-transferase A3
222553_x_at	-2.059	1	0.21219	0.03951	-1.988	0.10346	0.75377	2725.14	2054.14	oxidation resistance 1
229905_at	-2.057	1	0.21385	0.03968	-0.549	0.60655	0.78774	672.754	529.952	Transcribed locus
231098_at	-2.045	1	0.21866	0.04081	-3.154	0.02526	0.41736	89.556	37.3774	Transcribed locus
226558_at	-2.043	1	0.21891	0.04102	-2.392	0.06224	0.5154	557.491	287.329	hypothetical gene supported by AK096952; AK126241; BC068588
202053_s_at	-2.041	1	0.21943	0.0412	-2.278	0.07167	0.74816	4555.69	3408.4	aldehyde dehydrogenase 3 family, member A2
228381_at	-2.04	1	0.21962	0.04138	-3.861	0.01187	0.54935	578.468	317.781	Activating transcription factor 7 interacting protein 2
228341_at	-2.034	1	0.22104	0.04194	-1.884	0.11828	0.51931	144.401	74.9885	Hypothetical protein FLJ31265
205363_at	-2.033	1	0.22104	0.042	-0.969	0.37686	0.78934	1997.5	1576.71	butyrobetaine (gamma), 2-oxoglutarate dioxygenase (gamma-butyrobetaine hydroxylase) 1
202705_at	-2.032	1	0.22104	0.04212	-1.972	0.10569	0.565	678.308	383.246	cyclin B2
218663_at	-2.031	1	0.22104	0.04224	-1.688	0.15219	0.56402	65.458	36.9197	chromosome condensation protein G
226003_at	-2.03	1	0.22104	0.04234	-3.385	0.01957	0.69289	6828.15	4731.16	kinesin family member 21A
1555298_a_at	-2.023	1	0.22335	0.04306	-1.361	0.2316	0.53205	629.526	334.937	hypothetical protein MGC26733
203178_at	-2.019	1	0.22409	0.04346	-0.471	0.65775	0.72986	574.394	419.225	glycine amidinotransferase (L-arginine:glycine amidinotransferase)
229982_at	-2.017	1	0.22456	0.04373	-1.736	0.14308	0.6868	2074.61	1424.84	hypothetical protein FLJ21924
218901_at	-2.016	1	0.22456	0.04375	-3.715	0.01379	0.46618	353.906	164.984	phospholipid scramblase 4
223130_s_at	-2.014	1	0.22522	0.04398	-2.594	0.0486	0.61755	914.283	564.612	myosin regulatory light chain interacting protein
1553186_x_at	-2.011	1	0.22622	0.04434	-2.295	0.07017	0.50646	254.217	128.75	RAS and EF hand domain containing
208070_s_at	-2.009	1	0.22645	0.04453	-3.148	0.02542	0.55534	551.742	306.404	REV3-like, catalytic subunit of DNA polymerase zeta (yeast)
201211_s_at	-2.002	1	0.22913	0.04525	-1.233	0.27245	0.55098	1560.94	860.044	DEAD (Asp-Glu-Ala-Asp) box polypeptide 3, X-linked
223985_at	-2.002	1	0.22913	0.04532	-0.761	0.48122	0.57841	75.5866	43.7201	coiled-coil domain containing 10
223821_s_at	-2.001	1	0.22913	0.04537	-4.174	0.0087	0.42167	444.127	187.273	hypothetical protein FLJ10052
219850_s_at	-1.997	1	0.2305	0.04584	-1.963	0.10685	0.69035	7688.13	5307.5	ets homologous factor
230300_at	-1.997	1	0.2305	0.04587	-1.431	0.21173	0.54499	29.1304	15.8759	CDNA FLJ42315 fis, clone TRACH2019661
212468_at	-1.995	1	0.2305	0.04603	-1.938	0.11041	0.52298	57.0823	29.8529	sperm associated antigen 9
208934_s_at	-1.994	1	0.23125	0.04619	-2.834	0.0365	0.70216	3484.29	2446.52	lectin, galactoside-binding, soluble, 8 (galectin 8)
225241_at	-1.991	1	0.23225	0.04648	-2.855	0.03561	0.58975	945.004	557.317	steroid sensitive gene 1
203418_at	-1.989	1	0.23273	0.04669	-2.094	0.09049	0.44087	37.424	16.4993	cyclin A2
203153_at	-1.984	1	0.23323	0.04722	-6.08	0.00174	0.45969	305.745	140.547	interferon-induced protein with tetratricopeptide repeats 1 /// interferon-induced protein with tetratricopeptide repeats 1
214720_x_at	-1.984	1	0.23323	0.04723	-1.327	0.24198	0.63103	779.707	492.02	septin 10
226018_at	-1.983	1	0.23366	0.04739	-5.304	0.00318	0.53161	665.183	353.619	hypothetical protein Ells1
204146_at	-1.978	1	0.23507	0.04793	-3.995	0.01037	0.46837	218.464	102.322	RAD51 associated protein 1
233827_s_at	-1.975	1	0.23546	0.04827	-1.261	0.26289	0.24324	215.626	52.4478	suppressor of Ty 16 homolog (S. cerevisiae)
213802_at	-1.972	1	0.23546	0.04857	-2.339	0.06644	0.72051	1583.24	1140.74	Protease, serine, 12 (neurotrypsin, motopsin)
202545_at	-1.972	1	0.23546	0.04865	-4.736	0.00517	0.4879	269.088	131.288	protein kinase C, delta
227803_at	-1.971	1	0.23546	0.04869	-1.704	0.14912	0.78496	4048.77	3178.11	ectonucleotide pyrophosphatase/phosphodiesterase 5 (putative function)
223316_at	-1.971	1	0.23546	0.04871	-0.528	0.62022	0.40281	436.579	175.859	coiled-coil domain containing 3
204237_at	-1.97	1	0.23546	0.04886	-0.601	0.57382	0.83664	2827.05	2365.22	GULP, engulfment adaptor PTB domain containing 1
206925_at	-1.97	1	0.23546	0.04889	-1.379	0.22645	0.5218	52.5847	27.4388	ST8 alpha-N-acetyl-neuraminide alpha-2,8-sialyltransferase 4
222288_at	-1.968	1	0.23612	0.04905	-1.072	0.33291	0.71021	602.596	427.967	Similar to CG9996-PA

## Sheet: Up AZT 48hr SMM 6hr vs SMM 6hr
probe.name	z.stat	fdr.BH	fdr.RE	z.pv	t.stat	t.pv	fc2power	mexpcon	mexptrt	gene.name
209395_at	13.141	0	0	0	2.763	0.05067	32.6703	53.4264	1745.45	chitinase 3-like 1 (cartilage glycoprotein-39)
201141_at	12.093	0	0	0	9.797	0.00061	8.43302	1865.9	15735.2	glycoprotein (transmembrane) nmb
1554018_at	11.414	0	0	0	7.782	0.00147	67.4775	30.5477	2061.28	glycoprotein (transmembrane) nmb
209396_s_at	10.28	0	0	0	2.169	0.09593	14.1469	17.7931	251.718	chitinase 3-like 1 (cartilage glycoprotein-39)
241031_at	8.065	0	0.07857	0	3.627	0.02222	11.2202	92.9487	1042.9	Nuclear localized factor 1
229797_at	7.727	0	0.07857	0	3.158	0.03426	12.4286	13.0068	161.656	mucolipin 3
200832_s_at	7.424	0	0.07857	0	5.747	0.00454	2.7414	9630.27	26400.4	stearoyl-CoA desaturase (delta-9-desaturase)
209616_s_at	6.207	0	0.08418	0	0.362	0.73585	1.33684	3056.96	4086.66	carboxylesterase 1 (monocyte/macrophage serine esterase 1)
225328_at	6.169	0	0.08418	0	3.292	0.03017	9.22532	42.8974	395.742	F-box protein 32
201963_at	5.954	1e-05	0.09166	0	4.09	0.01498	2.56417	3092.19	7928.91	acyl-CoA synthetase long-chain family member 1
219564_at	5.633	5e-05	0.12692	0	3.719	0.0205	10.4463	32.6742	341.323	potassium inwardly-rectifying channel, subfamily J, member 16
216028_at	5.362	0.0002	0.12692	0	1.37	0.24248	2.3388	432.11	1010.62	DKFZP564C152 protein
218687_s_at	5.318	0.00024	0.12692	0	2.54	0.06399	3.97974	423.959	1687.24	mucin 13, epithelial transmembrane
211708_s_at	5.262	0.0003	0.12692	0	0.178	0.86716	1.25523	500.402	628.119	stearoyl-CoA desaturase (delta-9-desaturase) /// stearoyl-CoA desaturase (delta-9-desaturase)
226884_at	5.249	0.00031	0.12692	0	3.68	0.02121	2.25646	1997.72	4507.77	leucine rich repeat neuronal 1
219195_at	5.204	0.00036	0.12692	0	4.606	0.00999	4.48255	266.258	1193.51	peroxisome proliferative activated receptor, gamma, coactivator 1, alpha
211162_x_at	5.204	0.00036	0.12692	0	0.009	0.99346	1.01304	423.13	428.65	stearoyl-CoA desaturase (delta-9-desaturase)
221698_s_at	4.983	0.00104	0.12692	0	1.473	0.21465	5.37136	45.5054	244.426	C-type lectin domain family 7, member A /// C-type lectin domain family 7, member A
207275_s_at	4.807	0.0021	0.12692	0	2.669	0.05589	2.48332	813.751	2020.8	acyl-CoA synthetase long-chain family member 1
212190_at	4.766	0.00251	0.12692	0	1.244	0.28152	1.84644	1077.99	1990.45	serine (or cysteine) proteinase inhibitor, clade E (nexin, plasminogen activator inhibitor type 1), member 2
225275_at	4.738	0.00274	0.12692	0	2.149	0.09805	4.82529	100.209	483.539	EGF-like repeats and discoidin I-like domains 3
222712_s_at	4.702	0.00312	0.12692	0	4.327	0.01238	2.85577	335.778	958.905	mucin 13, epithelial transmembrane
237215_s_at	4.624	0.00448	0.12692	0	-0.048	0.96383	0.9345	261.391	244.27	transferrin receptor (p90, CD71)
205783_at	4.581	0.00539	0.12692	0	1.006	0.37129	3.125	43.6708	136.471	kallikrein 13
218918_at	4.54	0.00626	0.12692	1e-05	3.603	0.02269	2.78349	594.654	1655.21	mannosidase, alpha, class 1C, member 1
218484_at	4.424	0.01019	0.12692	1e-05	2.887	0.0447	6.06047	138.468	839.182	NADH:ubiquinone oxidoreductase MLRQ subunit homolog
208691_at	4.412	0.01057	0.12692	1e-05	7.502	0.00169	1.88965	7292.5	13780.3	---
209732_at	4.4	0.01077	0.12692	1e-05	2.945	0.04219	2.62255	518.62	1360.1	C-type lectin domain family 2, member B
214063_s_at	4.39	0.01108	0.12692	1e-05	3.624	0.02228	2.89563	868.336	2514.37	transferrin
212218_s_at	4.366	0.01154	0.12692	1e-05	3.135	0.035	2.25702	1706.45	3851.49	fatty acid synthase
204070_at	4.295	0.01468	0.12692	2e-05	4.241	0.01326	1.58013	11642.8	18397.2	retinoic acid receptor responder (tazarotene induced) 3
235892_at	4.201	0.02085	0.13749	3e-05	2.918	0.04332	3.18	504.982	1605.84	Transcribed locus, weakly similar to NP_060312.1 hypothetical protein FLJ20489 [Homo sapiens]
205259_at	4.148	0.02515	0.14086	3e-05	2.628	0.05832	2.23863	467.775	1047.17	nuclear receptor subfamily 3, group C, member 2
204463_s_at	4.143	0.02532	0.14086	3e-05	3.195	0.03306	7.38069	12.1795	89.8929	endothelin receptor type A
230493_at	4.14	0.02532	0.14086	3e-05	2.257	0.08694	3.40897	195.53	666.557	WGAR9166
201667_at	4.089	0.0312	0.14086	4e-05	2.261	0.08654	1.88493	6395.79	12055.6	gap junction protein, alpha 1, 43kDa (connexin 43)
204237_at	4.067	0.03384	0.14086	5e-05	3.205	0.03276	2.64954	2141.82	5674.83	GULP, engulfment adaptor PTB domain containing 1
201471_s_at	4.048	0.03623	0.14086	5e-05	3.984	0.01634	1.8746	6615.54	12401.5	sequestosome 1
202245_at	4.002	0.04158	0.14086	6e-05	4.777	0.00879	2.73562	725.833	1985.6	lanosterol synthase (2,3-oxidosqualene-lanosterol cyclase)
224209_s_at	3.976	0.04557	0.14086	7e-05	2.075	0.10667	1.68816	3583.07	6048.81	guanine deaminase
214203_s_at	3.931	0.05406	0.14086	8e-05	1.717	0.16105	2.63687	165.468	436.317	proline dehydrogenase (oxidase) 1
225922_at	3.895	0.06029	0.14086	0.0001	3.59	0.02297	2.61858	292.647	766.322	KIAA1450 protein
209788_s_at	3.842	0.07337	0.14086	0.00012	0.806	0.46557	1.53473	826.226	1268.04	type 1 tumor necrosis factor receptor shedding aminopeptidase regulator
235342_at	3.835	0.07459	0.14086	0.00013	0.853	0.44156	1.70573	1075.74	1834.93	---
227960_s_at	3.828	0.07601	0.14086	0.00013	3.999	0.01614	1.87338	1972.32	3694.9	fumarylacetoacetate hydrolase domain containing 1
211019_s_at	3.776	0.09257	0.14086	0.00016	1.586	0.188	2.53237	84.8891	214.971	lanosterol synthase (2,3-oxidosqualene-lanosterol cyclase)
201785_at	3.74	0.10386	0.14086	0.00018	0.416	0.69888	1.55283	682.999	1060.58	ribonuclease, RNase A family, 1 (pancreatic)
223434_at	3.676	0.12571	0.14165	0.00024	0.691	0.52752	1.26686	7650.21	9691.76	guanylate binding protein 3
1555854_at	3.66	0.13275	0.14165	0.00025	3.029	0.0388	1.91658	2728.09	5228.61	---
209480_at	3.596	0.16216	0.14859	0.00032	1.79	0.14795	2.63205	495.927	1305.3	---
208963_x_at	3.572	0.17293	0.14859	0.00035	2.552	0.0632	3.99333	289.518	1156.14	fatty acid desaturase 1
242773_at	3.545	0.18678	0.14859	0.00039	4.899	0.00805	5.77604	11.3978	65.8339	solute carrier family 5 (sodium/glucose cotransporter), member 1
205267_at	3.512	0.2054	0.14942	0.00044	2.701	0.05402	5.60514	24.8663	139.379	POU domain, class 2, associating factor 1
223839_s_at	3.511	0.2054	0.14942	0.00045	2.497	0.06698	2.54285	1072.11	2726.23	---
208962_s_at	3.511	0.2054	0.14942	0.00045	2.629	0.05825	3.48713	430.786	1502.21	fatty acid desaturase 1
200831_s_at	3.451	0.24363	0.14942	0.00056	4.083	0.01506	1.96478	1980.12	3890.5	stearoyl-CoA desaturase (delta-9-desaturase)
208003_s_at	3.45	0.24363	0.14942	0.00056	3.918	0.01728	5.32813	11.9029	63.42	nuclear factor of activated T-cells 5, tonicity-responsive
228297_at	3.44	0.24914	0.14942	0.00058	1.246	0.28064	1.4298	4448.52	6360.5	---
225401_at	3.439	0.24914	0.14942	0.00058	5.104	0.00696	2.43356	320.554	780.086	kidney predominant protein NCU-G1
200743_s_at	3.424	0.25949	0.14942	0.00062	4.894	0.00808	2.32086	858.662	1992.84	tripeptidyl peptidase I
1555756_a_at	3.406	0.27271	0.14942	0.00066	2.379	0.07603	6.95136	15.9277	110.719	C-type lectin domain family 7, member A
206932_at	3.396	0.27918	0.14942	0.00068	1.063	0.34779	2.59969	126.183	328.035	cholesterol 25-hydroxylase
213891_s_at	3.367	0.30284	0.14942	0.00076	1.755	0.15409	2.35569	329.372	775.9	Transcription factor 4
201427_s_at	3.366	0.30284	0.14942	0.00076	3.844	0.0184	1.82652	6920.08	12639.7	selenoprotein P, plasma, 1
202554_s_at	3.363	0.30284	0.14942	0.00077	0.949	0.39638	3.40889	60.4432	206.044	glutathione S-transferase M3 (brain)
205534_at	3.313	0.3471	0.14942	0.00092	4.612	0.00994	3.59201	136.89	491.711	BH-protocadherin (brain-heart)
213112_s_at	3.286	0.37034	0.14942	0.00102	3.496	0.02499	6.06187	27.0948	164.245	sequestosome 1
206628_at	3.243	0.42466	0.14942	0.00118	10.124	0.00054	6.32405	3.4676	21.9292	solute carrier family 5 (sodium/glucose cotransporter), member 1
205042_at	3.235	0.43159	0.14942	0.00122	3.693	0.02096	1.95174	1147.49	2239.6	glucosamine (UDP-N-acetyl)-2-epimerase/N-acetylmannosamine kinase
207057_at	3.213	0.45113	0.14942	0.00131	3.006	0.0397	2.03421	468.02	952.05	---
239439_at	3.201	0.45899	0.14942	0.00137	-0.047	0.965	0.93481	94.5237	88.3618	ALL1 fused gene from 5q31
218031_s_at	3.171	0.49774	0.155	0.00152	2.005	0.11543	2.21682	258.669	573.424	checkpoint suppressor 1
200661_at	3.171	0.49774	0.15501	0.00152	7.452	0.00173	1.97153	1442.2	2843.34	protective protein for beta-galactosidase (galactosialidosis)
207655_s_at	3.149	0.52607	0.15501	0.00164	2.805	0.04858	3.25385	217.553	707.884	B-cell linker
201122_x_at	3.132	0.55197	0.15501	0.00174	0.876	0.43034	1.45461	573.37	834.029	eukaryotic translation initiation factor 5A
1552485_at	3.128	0.55674	0.15501	0.00176	1.731	0.15848	2.49404	37.0157	92.3185	lactamase, beta
226960_at	3.125	0.55827	0.15501	0.00178	8.062	0.00129	1.40811	15500.7	21826.7	DMC
219496_at	3.098	0.60001	0.15501	0.00195	1.681	0.16802	2.02754	416.25	843.965	chromosome 2 open reading frame 26
202382_s_at	3.097	0.60001	0.15501	0.00195	3.557	0.02366	2.07331	1264.74	2622.2	glucosamine-6-phosphate deaminase 1
209949_at	3.081	0.62489	0.15501	0.00206	1.87	0.13485	1.90989	706.784	1349.88	neutrophil cytosolic factor 2 (65kDa, chronic granulomatous disease, autosomal 2)
223551_at	3.08	0.62489	0.15501	0.00207	2.686	0.05491	2.00413	420.716	843.169	protein kinase (cAMP-dependent, catalytic) inhibitor beta
206584_at	3.074	0.63056	0.15501	0.00211	2.168	0.09602	4.53372	32.9142	149.224	lymphocyte antigen 96
210397_at	3.059	0.65351	0.15592	0.00222	1.097	0.33427	2.40924	231.277	557.201	defensin, beta 1
204455_at	3.022	0.72596	0.15592	0.00251	2.898	0.04421	2.29578	881.31	2023.3	dystonin
222494_at	3.02	0.72857	0.15592	0.00253	2.915	0.04345	1.85782	751.91	1396.91	checkpoint suppressor 1
208116_s_at	3.016	0.72869	0.15592	0.00256	0.635	0.55968	1.69991	23.6745	40.2445	mannosidase, alpha, class 1A, member 1
210029_at	2.941	0.87565	0.16485	0.00327	1.348	0.24905	2.49499	200.309	499.769	indoleamine-pyrrole 2,3 dioxygenase
216598_s_at	2.939	0.87565	0.16485	0.00329	1.305	0.26179	3.40906	8.26981	28.1923	chemokine (C-C motif) ligand 2
201625_s_at	2.938	0.87565	0.16485	0.0033	1.754	0.15423	1.97847	636.63	1259.56	insulin induced gene 1
212077_at	2.933	0.88338	0.16485	0.00336	3.724	0.0204	1.83071	1109.03	2030.31	caldesmon 1
1553970_s_at	2.928	0.88483	0.16485	0.00341	0.603	0.57902	1.40968	1732.24	2441.9	carboxyl ester lipase (bile salt-stimulated lipase)
208926_at	2.928	0.88483	0.16485	0.00341	7.984	0.00133	1.88842	906.934	1712.67	sialidase 1 (lysosomal sialidase)
210159_s_at	2.926	0.88572	0.16485	0.00343	1.011	0.36935	2.39625	11.3259	27.1397	tripartite motif-containing 31
1556134_a_at	2.915	0.8971	0.16485	0.00356	3.593	0.02289	3.52136	11.1089	39.1185	MCF.2 cell line derived transforming sequence-like 2
203196_at	2.904	0.91852	0.16485	0.00368	4.397	0.01172	2.09957	409.149	859.036	ATP-binding cassette, sub-family C (CFTR/MRP), member 4
222787_s_at	2.897	0.92458	0.16485	0.00377	2.17	0.09583	1.54533	2709.16	4186.54	hypothetical protein FLJ11273
208881_x_at	2.895	0.9247	0.16485	0.00379	2.315	0.08158	1.68741	6201.71	10464.8	isopentenyl-diphosphate delta isomerase
227051_at	2.892	0.92933	0.16492	0.00383	2.496	0.06704	2.12159	619.756	1314.87	Homo sapiens, clone IMAGE:4393354, mRNA
224367_at	2.89	0.92933	0.16492	0.00385	2.875	0.04523	2.1143	400.024	845.771	brain expressed X-linked 2 /// brain expressed X-linked 2
226824_at	2.888	0.92933	0.16492	0.00387	2.109	0.10261	1.96267	258.624	507.593	carboxypeptidase X (M14 family), member 2
213187_x_at	2.873	0.9625	0.16492	0.00406	3.919	0.01727	1.35749	14738.2	20007	ferritin, light polypeptide
202436_s_at	2.873	0.9625	0.16492	0.00407	2.551	0.06327	1.75606	1104.24	1939.12	cytochrome P450, family 1, subfamily B, polypeptide 1
205363_at	2.864	0.97959	0.16492	0.00418	1.362	0.24484	1.48155	773.323	1145.71	butyrobetaine (gamma), 2-oxoglutarate dioxygenase (gamma-butyrobetaine hydroxylase) 1
206108_s_at	2.857	0.99083	0.16492	0.00428	0.151	0.88735	1.26849	101.21	128.384	splicing factor, arginine/serine-rich 6
228058_at	2.85	1	0.16588	0.00437	0.511	0.63653	1.23232	3434.92	4232.93	similar to common salivary protein 1
226158_at	2.838	1	0.1661	0.00454	4.802	0.00863	1.88447	525.701	990.67	hypothetical protein LOC339924
201626_at	2.801	1	0.1661	0.00509	2.018	0.11373	1.82362	4426.2	8071.7	insulin induced gene 1
1555037_a_at	2.801	1	0.1661	0.00509	1.123	0.32433	1.2547	10221.6	12825	isocitrate dehydrogenase 1 (NADP+), soluble
225272_at	2.782	1	0.1661	0.00541	9.376	0.00072	1.77466	1186.94	2106.41	spermidine/spermine N1-acetyltransferase 2
212952_at	2.765	1	0.1661	0.00569	0.239	0.82288	1.10342	1605.73	1771.79	---
201887_at	2.752	1	0.1661	0.00592	1.457	0.21878	1.44893	2820.14	4086.18	interleukin 13 receptor, alpha 1
203178_at	2.752	1	0.1661	0.00593	1.501	0.20768	2.21191	247.367	547.155	glycine amidinotransferase (L-arginine:glycine amidinotransferase)
212119_at	2.744	1	0.1661	0.00606	4.431	0.01141	1.75617	3325.74	5840.55	ras homolog gene family, member Q
229450_at	2.741	1	0.1661	0.00612	3.424	0.02667	1.76134	727.66	1281.66	interferon-induced protein with tetratricopeptide repeats 3
226694_at	2.73	1	0.1661	0.00633	1.628	0.17885	2.5327	294.749	746.511	PALM2-AKAP2 protein
234312_s_at	2.727	1	0.1661	0.00639	2.55	0.0633	2.5648	554.835	1423.04	acetyl-Coenzyme A synthetase 2 (ADP forming)
200953_s_at	2.723	1	0.1661	0.00648	3.526	0.02432	1.63657	1926.06	3152.13	cyclin D2
227126_at	2.719	1	0.1661	0.00655	2.862	0.04583	2.60798	83.0434	216.576	Transcribed locus
209348_s_at	2.717	1	0.1661	0.00659	6.6	0.00273	2.32258	258.656	600.748	v-maf musculoaponeurotic fibrosarcoma oncogene homolog (avian)
205822_s_at	2.707	1	0.1661	0.00678	0.229	0.83017	1.23047	165.326	203.429	3-hydroxy-3-methylglutaryl-Coenzyme A synthase 1 (soluble)
200701_at	2.704	1	0.1661	0.00686	5.836	0.0043	1.55508	7760.66	12068.4	Niemann-Pick disease, type C2
206262_at	2.698	1	0.1661	0.00697	1.411	0.23102	3.7427	188.683	706.184	alcohol dehydrogenase 1C (class I), gamma polypeptide
205990_s_at	2.696	1	0.1661	0.00701	1.267	0.27404	1.90552	244.459	465.821	wingless-type MMTV integration site family, member 5A
224995_at	2.687	1	0.1661	0.0072	4.315	0.0125	1.98956	765.832	1523.67	spire homolog 1 (Drosophila)
204235_s_at	2.679	1	0.1661	0.00739	2.227	0.08993	2.39478	812.026	1944.62	GULP, engulfment adaptor PTB domain containing 1
1552664_at	2.678	1	0.1661	0.00741	1.996	0.11665	2.38163	196.993	469.165	folliculin
200762_at	2.677	1	0.1661	0.00742	2.225	0.09016	1.94697	389.164	757.69	dihydropyrimidinase-like 2
205910_s_at	2.673	1	0.1661	0.00751	0.594	0.58429	1.40156	1497.62	2099	carboxyl ester lipase (bile salt-stimulated lipase)
201944_at	2.671	1	0.1661	0.00755	4.967	0.00767	1.65721	3086.31	5114.66	hexosaminidase B (beta polypeptide)
205022_s_at	2.669	1	0.1661	0.00762	2.726	0.05267	1.82279	406.288	740.576	checkpoint suppressor 1
225871_at	2.661	1	0.1661	0.00779	1.46	0.21808	1.88219	426.116	802.032	six transmembrane epithelial antigen of prostate 2
200871_s_at	2.661	1	0.1661	0.0078	4.696	0.00934	1.38795	12947.4	17970.3	prosaposin (variant Gaucher disease and variant metachromatic leukodystrophy)
223044_at	2.647	1	0.1661	0.00812	1.446	0.22159	1.60398	723.796	1160.95	solute carrier family 40 (iron-regulated transporter), member 1
232230_at	2.635	1	0.1661	0.00842	3.147	0.03461	2.60511	103.273	269.037	Chromosome 10 open reading frame 75
1554485_s_at	2.633	1	0.1661	0.00847	2.858	0.04601	3.69442	89.5884	330.977	---
227180_at	2.631	1	0.1661	0.0085	4.54	0.0105	4.77298	9.45402	45.1239	ELOVL family member 7, elongation of long chain fatty acids (yeast)
226806_s_at	2.627	1	0.16639	0.00861	1.259	0.27661	1.6524	399.037	659.369	Full length insert cDNA clone ZD69D05
206907_at	2.615	1	0.16861	0.00892	5.706	0.00467	3.21149	74.9416	240.674	tumor necrosis factor (ligand) superfamily, member 9
212276_at	2.612	1	0.16861	0.009	6.031	0.00381	2.62645	221.173	580.898	lipin 1
204446_s_at	2.611	1	0.16861	0.00903	0.905	0.41659	1.90721	70.2489	133.98	arachidonate 5-lipoxygenase
200742_s_at	2.609	1	0.16861	0.00909	1.195	0.29826	1.60352	448.25	718.776	tripeptidyl peptidase I
228640_at	2.604	1	0.16861	0.0092	2.344	0.079	3.37015	160.619	541.311	BH-protocadherin (brain-heart)
232593_at	2.594	1	0.16861	0.00948	9.633	0.00065	2.62947	178.22	468.624	hypothetical protein BC012317
202638_s_at	2.593	1	0.16861	0.00951	2.05	0.10968	1.88838	380.84	719.17	intercellular adhesion molecule 1 (CD54), human rhinovirus receptor
212788_x_at	2.59	1	0.16861	0.00961	3.943	0.01691	1.31824	16494.5	21743.7	ferritin, light polypeptide
209146_at	2.577	1	0.16961	0.00997	2.878	0.04509	1.51247	12964	19607.7	sterol-C4-methyl oxidase-like
230194_at	2.575	1	0.16961	0.01002	0.804	0.46669	1.41573	273.841	387.686	Leucine-rich PPR-motif containing
203372_s_at	2.571	1	0.16969	0.01013	0.988	0.3793	1.90265	39.7698	75.6681	suppressor of cytokine signaling 2
207332_s_at	2.543	1	0.17301	0.01099	5.914	0.00409	1.80429	3378.77	6096.29	transferrin receptor (p90, CD71)
205921_s_at	2.533	1	0.17882	0.01131	-0.352	0.74267	0.6723	378.746	254.629	solute carrier family 6 (neurotransmitter transporter, taurine), member 6
214180_at	2.525	1	0.18183	0.01158	2.909	0.04374	2.09693	200.566	420.572	Mannosidase, alpha, class 1C, member 1
221750_at	2.525	1	0.18183	0.01159	2.105	0.10305	1.84803	2467.36	4559.75	3-hydroxy-3-methylglutaryl-Coenzyme A synthase 1 (soluble)
223376_s_at	2.521	1	0.18247	0.01172	5.443	0.00553	1.60556	3434.34	5514.05	brain protein I3
203400_s_at	2.52	1	0.18247	0.01174	2.285	0.08434	2.72693	655.154	1786.56	transferrin
208964_s_at	2.513	1	0.18255	0.01196	2.74	0.05188	3.21998	281.978	907.962	fatty acid desaturase 1
202679_at	2.508	1	0.18424	0.01215	3.715	0.02056	1.73101	783.803	1356.77	Niemann-Pick disease, type C1
218700_s_at	2.5	1	0.18441	0.01241	8.565	0.00102	2.10185	478.331	1005.38	RAB7, member RAS oncogene family-like 1
237974_at	2.5	1	0.18441	0.01241	1.36	0.24549	2.4229	213.82	518.064	chromosome 14 open reading frame 29
218007_s_at	2.5	1	0.18441	0.01243	3.622	0.02231	1.56653	9835.99	15408.4	ribosomal protein S27-like
204670_x_at	2.497	1	0.18441	0.01251	0.936	0.40235	1.37795	1897.27	2614.34	major histocompatibility complex, class II, DR beta 1
202022_at	2.496	1	0.18441	0.01256	2.878	0.04509	2.43545	357.154	869.828	aldolase C, fructose-bisphosphate
1558693_s_at	2.479	1	0.18676	0.01317	3.782	0.0194	2.54396	202.238	514.485	kidney predominant protein NCU-G1
202308_at	2.477	1	0.18684	0.01326	5.623	0.00492	1.84378	842.329	1553.07	sterol regulatory element binding transcription factor 1
227266_s_at	2.473	1	0.18747	0.01339	2.085	0.10547	2.56285	55.2664	141.64	FYN binding protein (FYB-120/130)
209792_s_at	2.47	1	0.18749	0.01353	1.164	0.30924	1.69525	2489.82	4220.87	kallikrein 10
228768_at	2.467	1	0.18754	0.01362	3.91	0.0174	1.93067	637.271	1230.36	KIAA1961 gene
204469_at	2.466	1	0.18754	0.01367	2.152	0.09779	2.02909	811.362	1646.33	protein tyrosine phosphatase, receptor-type, Z polypeptide 1
226649_at	2.453	1	0.18924	0.01415	2.386	0.07547	2.34528	138.829	325.592	pantothenate kinase 1
222693_at	2.449	1	0.18924	0.01433	0.423	0.69372	1.15603	1949.33	2253.49	fibronectin type III domain containing 3B
204615_x_at	2.449	1	0.18924	0.01434	2.138	0.09935	1.60542	6393.39	10264.1	isopentenyl-diphosphate delta isomerase
212999_x_at	2.443	1	0.18927	0.01456	1.208	0.29368	1.87251	1330.79	2491.92	---
202218_s_at	2.435	1	0.19187	0.01488	2.168	0.09603	2.79479	399.665	1116.98	fatty acid desaturase 2
204864_s_at	2.435	1	0.19187	0.0149	-0.19	0.85836	0.79003	66.1662	52.2736	interleukin 6 signal transducer (gp130, oncostatin M receptor)
227172_at	2.434	1	0.19187	0.01494	1.548	0.19654	1.56144	458.042	715.203	hypothetical protein BC000282
241994_at	2.433	1	0.19187	0.01499	2.138	0.09926	6.86599	10.4517	71.761	Xanthine dehydrogenase
212186_at	2.429	1	0.1939	0.01512	5.427	0.00559	1.67829	1228.21	2061.29	acetyl-Coenzyme A carboxylase alpha
224598_at	2.426	1	0.19491	0.01526	7.869	0.00141	1.65486	2913.21	4820.96	mannosyl (alpha-1,3-)-glycoprotein beta-1,4-N-acetylglucosaminyltransferase, isoenzyme B
222514_at	2.421	1	0.19791	0.01548	5.575	0.00507	2.26707	277.355	628.783	Ras-related GTP binding C
219305_x_at	2.418	1	0.19791	0.0156	0.913	0.41276	1.57559	213.281	336.044	F-box protein 2
212324_s_at	2.414	1	0.19888	0.01579	0.572	0.59769	1.30459	1554.86	2028.45	vacuolar protein sorting 13D (yeast)
217208_s_at	2.411	1	0.19888	0.01593	-0.398	0.71064	0.68286	537.855	367.28	discs, large homolog 1 (Drosophila)
233586_s_at	2.396	1	0.20177	0.01658	4.097	0.01488	4.62072	41.5147	191.828	kallikrein 12
209389_x_at	2.386	1	0.20416	0.01704	3.004	0.03978	1.73552	7503.12	13021.8	diazepam binding inhibitor (GABA receptor modulator, acyl-Coenzyme A binding protein)
216092_s_at	2.385	1	0.20462	0.01709	4.227	0.0134	2.50421	159.523	399.479	solute carrier family 7 (cationic amino acid transporter, y+ system), member 8
215125_s_at	2.377	1	0.20552	0.01745	1.51	0.20553	1.32007	2296.91	3032.1	UDP glycosyltransferase 1 family, polypeptide A10 /// UDP glycosyltransferase 1 family, polypeptide A8 /// UDP glycosyltransferase 1 family, polypeptide A7 /// UDP glycosyltransferase 1 family, polypeptide A6 /// UDP glycosyltransferase 1 family, polypeptide A5 /// UDP glycosyltransferase 1 family, polypeptide A9 /// UDP glycosyltransferase 1 family, polypeptide A4 /// UDP glycosyltransferase 1 f…
1569582_at	2.376	1	0.20552	0.01749	2.344	0.07901	2.12051	70.1474	148.748	similar to esterase/N-deacetylase (EC 3.5.1.-), 50K hepatic - rabbit
212686_at	2.366	1	0.21075	0.01797	5.162	0.00669	1.58888	1935.12	3074.67	protein phosphatase 1H (PP2C domain containing)
229114_at	2.357	1	0.211	0.01842	2.625	0.0585	2.88059	26.321	75.8201	GRB2-associated binding protein 1
243278_at	2.356	1	0.211	0.0185	1.619	0.18074	2.23379	107.037	239.099	---
232318_s_at	2.355	1	0.211	0.01851	2.626	0.05841	3.97506	51.575	205.014	hypothetical protein LOC121838
213075_at	2.352	1	0.211	0.01865	3.419	0.0268	2.04469	351.567	718.847	olfactomedin-like 2A
214449_s_at	2.352	1	0.211	0.01869	1.02	0.36524	1.41968	979.828	1391.04	ras homolog gene family, member Q
225123_at	2.347	1	0.211	0.01894	2.362	0.0775	1.63928	819.456	1343.32	Sestrin 3
212929_s_at	2.337	1	0.211	0.01944	3.287	0.0303	2.02391	628.244	1271.51	FLJ10824 protein /// similar to KIAA0592 protein
212326_at	2.336	1	0.211	0.01949	2.349	0.07861	1.75962	935.931	1646.88	vacuolar protein sorting 13D (yeast)
201791_s_at	2.336	1	0.211	0.0195	2.871	0.04544	2.60762	532.001	1387.25	7-dehydrocholesterol reductase
209608_s_at	2.335	1	0.211	0.01954	2.331	0.0802	1.85498	1607.17	2981.28	acetyl-Coenzyme A acetyltransferase 2 (acetoacetyl Coenzyme A thiolase)
221524_s_at	2.334	1	0.21184	0.01962	10.025	0.00056	1.66718	1925.64	3210.4	Ras-related GTP binding D
211509_s_at	2.327	1	0.21226	0.01997	1.922	0.12693	1.12952	29101.7	32870.8	reticulon 4
201247_at	2.311	1	0.2178	0.02084	2.663	0.05621	1.52006	1266.61	1925.33	sterol regulatory element binding transcription factor 2
234291_s_at	2.307	1	0.21992	0.02108	3.907	0.01745	3.51554	11.0693	38.9144	solute carrier family 6 (neurotransmitter transporter), member 20
237212_at	2.3	1	0.22255	0.02146	2.357	0.0779	2.11146	115.152	243.138	Transcribed locus
222487_s_at	2.269	1	0.23303	0.02328	1.289	0.26702	1.76676	555.189	980.887	---
211070_x_at	2.249	1	0.23826	0.02454	2.41	0.07353	1.50615	11065.9	16667	diazepam binding inhibitor (GABA receptor modulator, acyl-Coenzyme A binding protein) /// diazepam binding inhibitor (GABA receptor modulator, acyl-Coenzyme A binding protein)
218559_s_at	2.237	1	0.2403	0.02526	3.181	0.03351	1.85428	691.824	1282.84	v-maf musculoaponeurotic fibrosarcoma oncogene homolog B (avian)
242961_x_at	2.237	1	0.2403	0.02528	1.374	0.24147	1.97078	54.9105	108.217	DEAD (Asp-Glu-Ala-Asp) box polypeptide 58
226463_at	2.237	1	0.2403	0.02531	3.338	0.02889	1.69705	499.94	848.422	ATPase, H+ transporting, lysosomal 42kDa, V1 subunit C, isoform 1
220625_s_at	2.236	1	0.2403	0.02534	1.365	0.244	2.29361	51.5468	118.228	E74-like factor 5 (ets domain transcription factor)
218352_at	2.235	1	0.2403	0.02545	1.45	0.22071	1.42007	777.797	1104.53	regulator of chromosome condensation (RCC1) and BTB (POZ) domain containing protein 1
235683_at	2.231	1	0.2403	0.02566	4.456	0.0112	3.89679	27.3298	106.498	sestrin 3
202437_s_at	2.229	1	0.2403	0.02584	3.134	0.03506	1.76776	1475.68	2608.65	cytochrome P450, family 1, subfamily B, polypeptide 1
218699_at	2.219	1	0.24273	0.02646	10.106	0.00054	1.89294	686.916	1300.29	RAB7, member RAS oncogene family-like 1
220250_at	2.216	1	0.24357	0.02672	2.981	0.0407	2.35598	21.9269	51.6593	zinc finger protein 286
217315_s_at	2.215	1	0.24357	0.02678	1.081	0.34037	2.3632	19.8353	46.8748	kallikrein 13
217775_s_at	2.214	1	0.24429	0.02685	1.881	0.13312	1.42672	1601.37	2284.71	retinol dehydrogenase 11 (all-trans and 9-cis)
228250_at	2.211	1	0.2445	0.02702	1.853	0.13749	2.95404	24.1151	71.237	KIAA1961 gene
214769_at	2.208	1	0.24512	0.02727	2.145	0.09854	2.52637	30.6737	77.493	Chloride channel 4
201553_s_at	2.204	1	0.24613	0.0275	5.713	0.00464	1.34729	15128.7	20382.7	lysosomal-associated membrane protein 1
221986_s_at	2.192	1	0.25111	0.02839	0.668	0.54053	1.48309	117.113	173.689	DRE1 protein
221510_s_at	2.189	1	0.25163	0.02858	0.791	0.47308	1.38346	467.283	646.466	glutaminase
238002_at	2.188	1	0.25163	0.0287	0.786	0.47566	1.31531	1119.38	1472.33	golgi phosphoprotein 4
204061_at	2.185	1	0.25163	0.02891	1.467	0.21632	1.57069	285.569	448.54	protein kinase, X-linked
202959_at	2.183	1	0.25163	0.02907	1.525	0.20191	1.45636	516.467	752.164	methylmalonyl Coenzyme A mutase
204941_s_at	2.177	1	0.25359	0.02949	-0.251	0.81424	0.76125	135.856	103.421	aldehyde dehydrogenase 3 family, member B2
217867_x_at	2.175	1	0.25359	0.02964	1.887	0.13215	1.41263	1426.98	2015.8	beta-site APP-cleaving enzyme 2
235529_x_at	2.173	1	0.25359	0.0298	2.06	0.10849	1.36055	4455.16	6061.49	---
213603_s_at	2.168	1	0.25426	0.03014	1.384	0.23865	1.58254	1158.32	1833.09	ras-related C3 botulinum toxin substrate 2 (rho family, small GTP binding protein Rac2)
209355_s_at	2.161	1	0.25546	0.0307	2.346	0.07882	1.94517	109.489	212.974	phosphatidic acid phosphatase type 2B
225018_at	2.159	1	0.2555	0.03086	1.448	0.22112	1.53142	395.165	605.165	spire homolog 1 (Drosophila)
242979_at	2.156	1	0.25576	0.0311	1.385	0.2383	1.7097	104.004	177.815	Transcribed locus
202435_s_at	2.153	1	0.2558	0.03129	2.237	0.08894	1.544	492.459	760.357	cytochrome P450, family 1, subfamily B, polypeptide 1
213753_x_at	2.153	1	0.2558	0.03134	0.791	0.47312	1.41548	514.196	727.835	eukaryotic translation initiation factor 5A
214196_s_at	2.151	1	0.25644	0.0315	-0.059	0.95606	0.95907	293.1	281.103	tripeptidyl peptidase I
218088_s_at	2.146	1	0.25789	0.0319	4.003	0.01609	2.15016	447.844	962.935	Ras-related GTP binding C
212274_at	2.145	1	0.25789	0.03197	4.234	0.01332	2.2375	102.519	229.386	lipin 1
232181_at	2.144	1	0.25789	0.03201	0.981	0.38201	1.75571	53.9319	94.6891	hypothetical protein LOC153346
222906_at	2.143	1	0.25789	0.03209	2.418	0.07289	2.21707	52.2739	115.895	feline leukemia virus subgroup C cellular receptor
240183_at	2.139	1	0.26027	0.03246	4.201	0.01369	2.72758	119.104	324.864	---
209122_at	2.136	1	0.26052	0.03265	1.498	0.20848	2.19749	183.571	403.395	adipose differentiation-related protein
221491_x_at	2.134	1	0.26128	0.03285	1.213	0.29182	2.22753	10.6644	23.7552	Major histocompatibility complex, class II, DR beta 4 /// Major histocompatibility complex, class II, DR beta 4
235152_at	2.132	1	0.26128	0.03303	0.798	0.46957	1.62249	36.5886	59.3644	Homo sapiens, clone IMAGE:5218412, mRNA
211657_at	2.131	1	0.26128	0.03311	2.832	0.04724	1.21015	22107.4	26753.2	carcinoembryonic antigen-related cell adhesion molecule 6 (non-specific cross reacting antigen) /// carcinoembryonic antigen-related cell adhesion molecule 6 (non-specific cross reacting antigen)
226147_s_at	2.13	1	0.26128	0.03314	0.75	0.49475	1.23767	6516.98	8065.85	polymeric immunoglobulin receptor
210143_at	2.13	1	0.26128	0.0332	1.234	0.28487	1.94576	1129.5	2197.73	annexin A10
219263_at	2.115	1	0.26667	0.03443	2.61	0.05945	1.51166	1311.13	1981.98	ring finger protein 128
212338_at	2.109	1	0.26884	0.03491	3.839	0.01847	1.74172	1579.6	2751.22	myosin ID
201790_s_at	2.104	1	0.27062	0.0354	2.69	0.05466	1.92549	943.322	1816.35	7-dehydrocholesterol reductase
229620_at	2.102	1	0.27121	0.03558	5.891	0.00415	2.7424	11.2045	30.7271	Selenoprotein P, plasma, 1
211795_s_at	2.095	1	0.27196	0.03613	1.838	0.1399	2.34908	165.154	387.961	FYN binding protein (FYB-120/130)
218434_s_at	2.081	1	0.27709	0.03744	3.428	0.02659	1.55337	2185.03	3394.15	acetoacetyl-CoA synthetase
218627_at	2.08	1	0.27709	0.0375	4.496	0.01086	1.71415	597.593	1024.37	hypothetical protein FLJ11259
203753_at	2.079	1	0.27709	0.03763	2.02	0.11345	1.74336	476.786	831.208	transcription factor 4
213508_at	2.078	1	0.27709	0.0377	5.846	0.00427	1.57549	969.88	1528.04	chromosome 14 open reading frame 147
205542_at	2.077	1	0.27709	0.03778	0.305	0.77538	1.15828	1376.6	1594.49	six transmembrane epithelial antigen of the prostate
203921_at	2.077	1	0.27709	0.03779	0.638	0.55839	1.38341	124.351	172.028	carbohydrate (N-acetylglucosamine-6-O) sulfotransferase 2
204058_at	2.073	1	0.27771	0.03817	2.601	0.05998	1.57773	2054.98	3242.21	Malic enzyme 1, NADP(+)-dependent, cytosolic
1558692_at	2.071	1	0.27794	0.03839	4.343	0.01223	2.74512	45.166	123.986	Kidney predominant protein NCU-G1
223435_s_at	2.07	1	0.27794	0.0385	1.323	0.25633	1.38661	440.939	611.408	protocadherin alpha 9 /// protocadherin alpha subfamily C, 2 /// protocadherin alpha subfamily C, 1 /// protocadherin alpha 13 /// protocadherin alpha 12 /// protocadherin alpha 11 /// protocadherin alpha 10 /// protocadherin alpha 8 /// protocadherin alpha 7 /// protocadherin alpha 6 /// protocadherin alpha 5 /// protocadherin alpha 4 /// protocadherin alpha 3 /// protocadherin alpha 2 /// proto…
226865_at	2.064	1	0.27794	0.03898	7.182	0.00199	2.50109	84.5715	211.521	MRNA; cDNA DKFZp564O0862 (from clone DKFZp564O0862)
221577_x_at	2.062	1	0.27794	0.03924	0.72	0.51138	1.24518	6612.29	8233.49	growth differentiation factor 15
216733_s_at	2.061	1	0.27794	0.03929	1.685	0.16728	1.77172	104.158	184.54	glycine amidinotransferase (L-arginine:glycine amidinotransferase)
205920_at	2.058	1	0.27917	0.03961	-0.34	0.75085	0.72429	736.093	533.148	solute carrier family 6 (neurotransmitter transporter, taurine), member 6
200989_at	2.056	1	0.28006	0.03979	2.497	0.06698	1.38109	13906.4	19206	hypoxia-inducible factor 1, alpha subunit (basic helix-loop-helix transcription factor)
202007_at	2.054	1	0.28011	0.03996	3.128	0.03526	2.4127	84.3974	203.626	nidogen (enactin)
217999_s_at	2.053	1	0.28011	0.04007	0.304	0.77596	1.32026	153.416	202.549	CDNA clone IMAGE:4514712, partial cds
217975_at	2.051	1	0.28064	0.04024	2.819	0.04786	1.34516	4583.76	6165.89	WW domain binding protein 5
205207_at	2.049	1	0.28103	0.04048	1.535	0.19955	3.17218	85.7535	272.025	interleukin 6 (interferon, beta 2)
244546_at	2.047	1	0.28108	0.04062	1.957	0.12204	2.86102	28.4258	81.3267	cytochrome c, somatic
201193_at	2.043	1	0.28218	0.04107	1.718	0.16086	1.25558	7432.38	9331.93	isocitrate dehydrogenase 1 (NADP+), soluble
238718_at	2.043	1	0.28218	0.04109	3.173	0.03377	3.43099	17.5751	60.3001	CDNA FLJ37816 fis, clone BRSSN2003093
218932_at	2.043	1	0.28218	0.04109	3.51	0.02467	1.59771	1250.21	1997.48	hypothetical protein FLJ20729
201123_s_at	2.039	1	0.28375	0.04148	0.356	0.73987	1.19699	3331.58	3987.86	eukaryotic translation initiation factor 5A
228441_s_at	2.034	1	0.28419	0.04191	2.386	0.07551	1.80259	123.375	222.395	PET112-like (yeast)
207177_at	2.034	1	0.28419	0.04196	2.368	0.07701	2.43864	14.735	35.9333	prostaglandin F receptor (FP)
1557383_a_at	2.031	1	0.28419	0.04225	0.106	0.92061	1.13271	24.3475	27.5787	CDNA FLJ38112 fis, clone D3OST2002272
236313_at	2.03	1	0.28489	0.04237	2.914	0.04352	1.88024	317.685	597.326	cyclin-dependent kinase inhibitor 2B (p15, inhibits CDK4)
202748_at	2.026	1	0.28558	0.04274	2.836	0.04708	1.5379	850.494	1307.97	guanylate binding protein 2, interferon-inducible /// guanylate binding protein 2, interferon-inducible
205844_at	2.021	1	0.28617	0.04324	0.819	0.45859	1.3694	219.424	300.479	vanin 1 /// vanin 1
201418_s_at	2.021	1	0.28617	0.04333	2.387	0.07545	1.56531	889.371	1392.14	SRY (sex determining region Y)-box 4
212117_at	2.018	1	0.28617	0.04356	2.649	0.05703	1.62816	980.49	1596.39	ras homolog gene family, member Q
200866_s_at	2.018	1	0.28617	0.04362	3.782	0.0194	1.41339	8809.97	12451.9	prosaposin (variant Gaucher disease and variant metachromatic leukodystrophy)
202073_at	2.013	1	0.28702	0.04413	2.334	0.07993	1.46322	808.431	1182.91	optineurin
202314_at	2.011	1	0.28816	0.04437	2.28	0.0848	1.65085	5733.28	9464.78	cytochrome P450, family 51, subfamily A, polypeptide 1
222764_at	2.009	1	0.28866	0.04454	2.856	0.04612	3.84437	78.8136	302.989	---
230043_at	2.005	1	0.29076	0.04493	2.037	0.11138	1.48429	610.129	905.611	Transcribed locus
229850_at	2	1	0.29318	0.04551	6.804	0.00244	1.48208	1675.75	2483.61	Full length insert cDNA clone YX81F03
212122_at	2	1	0.29318	0.04555	2.973	0.04104	2.15251	249.258	536.53	ras homolog gene family, member Q /// similar to ARHQ protein
227665_at	1.999	1	0.2932	0.04564	3.253	0.0313	1.43137	1211.32	1733.84	Mitochondrial carrier triple repeat 1
226460_at	1.998	1	0.2932	0.04569	7.569	0.00163	2.31589	129.853	300.724	KIAA1450 protein
212323_s_at	1.997	1	0.2932	0.04579	1.568	0.19188	1.45525	821.861	1196.01	vacuolar protein sorting 13D (yeast)
203042_at	1.997	1	0.2932	0.04587	5.239	0.00635	1.48374	1910.76	2835.07	lysosomal-associated membrane protein 2
236488_s_at	1.994	1	0.29415	0.04618	0.853	0.44185	1.59443	70.3207	112.121	CDNA FLJ36309 fis, clone THYMU2004986
202872_at	1.992	1	0.29415	0.04632	3.141	0.03481	1.48422	815.801	1210.83	ATPase, H+ transporting, lysosomal 42kDa, V1 subunit C, isoform 1
204942_s_at	1.99	1	0.29526	0.04657	5.102	0.00697	2.17376	220.533	479.385	aldehyde dehydrogenase 3 family, member B2
223134_at	1.988	1	0.29541	0.04677	1.228	0.28677	1.37923	1122.16	1547.73	bobby sox homolog (Drosophila)
225978_at	1.985	1	0.29744	0.04712	0.735	0.50324	1.22621	577.858	708.574	KIAA1238 protein
211654_x_at	1.984	1	0.29774	0.04729	1.233	0.28513	1.75995	929.759	1636.33	major histocompatibility complex, class II, DQ beta 1 /// major histocompatibility complex, class II, DQ beta 1
227209_at	1.981	1	0.29883	0.04754	2.098	0.10387	2.28977	12.2654	28.085	Contactin 1
203335_at	1.975	1	0.30017	0.04832	2.963	0.04143	2.04483	959.337	1961.68	phytanoyl-CoA hydroxylase (Refsum disease)
210946_at	1.973	1	0.30154	0.04851	1.518	0.20373	1.40238	780.73	1094.88	phosphatidic acid phosphatase type 2A
217889_s_at	1.967	1	0.3052	0.04918	0.261	0.80662	1.26493	20.7993	26.3096	cytochrome b reductase 1
201422_at	1.965	1	0.30567	0.04946	3.622	0.02233	1.51833	714.298	1084.54	interferon, gamma-inducible protein 30
225803_at	1.965	1	0.30567	0.04946	5.524	0.00524	1.84269	430.818	793.865	F-box protein 32

## Sheet: Down AZT48hr SMM6hr vs SMM 6hr
probe.name	z.stat	fdr.BH	fdr.RE	z.pv	t.stat	t.pv	fc2power	mexpcon	mexptrt	gene.name
240161_s_at	-4.714	0.00301	0.12692	0	-1.919	0.12739	0.32107	9351.38	3002.46	CDC20-like protein
227529_s_at	-4.74	0.00274	0.12692	0	-3.138	0.0349	0.07229	487.779	35.2629	A kinase (PRKA) anchor protein (gravin) 12
213611_at	-4.861	0.00164	0.12692	0	-2.583	0.06113	0.3482	1549.46	539.52	aquaporin 5
206247_at	-4.877	0.00155	0.12692	0	-0.739	0.50092	0.37239	87.3388	32.5242	MHC class I polypeptide-related sequence B
206825_at	-4.881	0.00155	0.12692	0	-1.161	0.31003	0.34286	488.021	167.322	oxytocin receptor
203213_at	-4.91	0.00138	0.12692	0	-3.351	0.02854	0.38274	2254.93	863.057	cell division cycle 2, G1 to S and G2 to M
203214_x_at	-4.912	0.00138	0.12692	0	-2.778	0.04992	0.17789	857.611	152.562	cell division cycle 2, G1 to S and G2 to M
206392_s_at	-4.975	0.00105	0.12692	0	-0.746	0.49726	0.72203	10315	7447.71	retinoic acid receptor responder (tazarotene induced) 1
205959_at	-5.068	0.00069	0.12692	0	-1.414	0.23017	0.39626	1559.17	617.842	matrix metalloproteinase 13 (collagenase 3) /// matrix metalloproteinase 13 (collagenase 3)
1556773_at	-5.115	0.00055	0.12692	0	-2.597	0.06022	0.40792	3777.71	1541.01	Parathyroid hormone-like hormone
213432_at	-5.206	0.00036	0.12692	0	-2.123	0.10097	0.25277	1612.16	407.501	mucin 5, subtype B, tracheobronchial
227530_at	-5.302	0.00025	0.12692	0	-5.662	0.0048	0.11829	899.162	106.359	A kinase (PRKA) anchor protein (gravin) 12
215177_s_at	-5.324	0.00024	0.12692	0	-2.857	0.04606	0.30752	3492.4	1074	integrin, alpha 6
209773_s_at	-5.435	0.00014	0.12692	0	-2.847	0.04654	0.15728	1259.58	198.104	ribonucleotide reductase M2 polypeptide
201890_at	-5.491	0.00011	0.12692	0	-3.159	0.03422	0.26602	1659.02	441.331	ribonucleotide reductase M2 polypeptide
222608_s_at	-5.669	4e-05	0.12692	0	-2.057	0.10887	0.29795	2087.48	621.958	anillin, actin binding protein (scraps homolog, Drosophila)
203065_s_at	-5.674	4e-05	0.12692	0	-3.286	0.03032	0.25284	1997.22	504.98	caveolin 1, caveolae protein, 22kDa
209277_at	-5.772	3e-05	0.12276	0	-2.815	0.04807	0.37096	2905.59	1077.86	tissue factor pathway inhibitor 2
210517_s_at	-6.226	0	0.08418	0	-3.435	0.02641	0.20102	3120.23	627.239	A kinase (PRKA) anchor protein (gravin) 12
207526_s_at	-6.876	0	0.08418	0	-3.228	0.03203	0.06681	431.62	28.8375	interleukin 1 receptor-like 1
203936_s_at	-7.831	0	0.07857	0	-2.394	0.07481	0.21785	5516.36	1201.76	matrix metalloproteinase 9 (gelatinase B, 92kDa gelatinase, 92kDa type IV collagenase)
201860_s_at	-8.519	0	0.07857	0	-1.352	0.24766	0.38267	11247.8	4304.2	plasminogen activator, tissue
239430_at	-8.848	0	0.07857	0	-4.829	0.00846	0.02627	694.248	18.2355	insulin growth factor-like family member 1
204614_at	-4.331	0.01307	0.12692	1e-05	-3.28	0.03049	0.4552	6511.97	2964.24	serine (or cysteine) proteinase inhibitor, clade B (ovalbumin), member 2
219148_at	-4.341	0.01273	0.12692	1e-05	-1.591	0.18691	0.27966	287.954	80.5281	PDZ binding kinase
202870_s_at	-4.374	0.01129	0.12692	1e-05	-3.052	0.03795	0.17656	1139.56	201.201	TNF receptor-associated factor 4
206884_s_at	-4.38	0.0112	0.12692	1e-05	-6.593	0.00274	0.30313	2706.51	820.417	sciellin
206391_at	-4.386	0.0111	0.12692	1e-05	-0.778	0.47987	0.73628	7543.87	5554.36	retinoic acid receptor responder (tazarotene induced) 1
205157_s_at	-4.405	0.01073	0.12692	1e-05	-3.229	0.03199	0.61287	20658.6	12661.1	keratin 17
226847_at	-4.49	0.00763	0.12692	1e-05	-3.077	0.03702	0.22462	1309.67	294.173	follistatin
1552619_a_at	-4.502	0.00735	0.12692	1e-05	-1.546	0.19691	0.12018	907.006	109	anillin, actin binding protein (scraps homolog, Drosophila)
210559_s_at	-4.55	0.0061	0.12692	1e-05	-2.248	0.08787	0.21248	856.472	181.983	cell division cycle 2, G1 to S and G2 to M
209278_s_at	-4.224	0.01958	0.13749	2e-05	-1.959	0.12168	0.42276	3481.55	1471.85	tissue factor pathway inhibitor 2
201291_s_at	-4.272	0.01603	0.12797	2e-05	-1.598	0.18533	0.35516	775.853	275.549	topoisomerase (DNA) II alpha 170kDa
207367_at	-4.319	0.01339	0.12692	2e-05	-3.02	0.03916	0.52634	10912.5	5743.7	ATPase, H+/K+ transporting, nongastric, alpha polypeptide
222958_s_at	-4.327	0.01314	0.12692	2e-05	-1.818	0.14313	0.23359	60.9397	14.2352	DEP domain containing 1
207345_at	-4.149	0.02515	0.14086	3e-05	-3.336	0.02895	0.13082	76.7248	10.0373	follistatin
205328_at	-4.175	0.02297	0.13832	3e-05	-2.159	0.09698	0.17659	388.72	68.6443	claudin 10
204641_at	-4.2	0.02085	0.13749	3e-05	-3.613	0.0225	0.3336	1685.52	562.283	NIMA (never in mitosis gene a)-related kinase 2
202954_at	-4.205	0.02085	0.13749	3e-05	-1.907	0.12913	0.39828	1473.73	586.955	ubiquitin-conjugating enzyme E2C
1553655_at	-4.045	0.03623	0.14086	5e-05	-1.492	0.20991	0.22694	715.291	162.325	CDC20-like protein
213240_s_at	-4.001	0.04158	0.14086	6e-05	-2.49	0.06749	0.48927	2636.62	1290.03	keratin 4
203755_at	-4.024	0.03857	0.14086	6e-05	-2.326	0.08063	0.22525	46.1165	10.388	BUB1 budding uninhibited by benzimidazoles 1 homolog beta (yeast)
204886_at	-4.024	0.03857	0.14086	6e-05	-2.318	0.08135	0.18951	189.33	35.8804	polo-like kinase 4 (Drosophila)
231771_at	-3.916	0.05584	0.14086	9e-05	-2.158	0.09714	0.11288	577.042	65.1357	gap junction protein, beta 6 (connexin 30)
204602_at	-3.927	0.05406	0.14086	9e-05	-3.844	0.0184	0.17176	507.217	87.1213	dickkopf homolog 1 (Xenopus laevis)
201292_at	-3.929	0.05406	0.14086	9e-05	-1.863	0.13594	0.29303	926.099	271.376	topoisomerase (DNA) II alpha 170kDa
227556_at	-3.862	0.06828	0.14086	0.00011	-0.487	0.65162	0.76369	12999	9927.18	non-metastatic cells 7, protein expressed in (nucleoside-diphosphate kinase)
218990_s_at	-3.742	0.10386	0.14086	0.00018	-6.762	0.0025	0.38264	2964.15	1134.21	small proline-rich protein 3
232082_x_at	-3.749	0.10214	0.14086	0.00018	-4.628	0.00982	0.23892	819.119	195.707	---
203362_s_at	-3.729	0.10704	0.14086	0.00019	-3.967	0.01659	0.46221	3297.88	1524.33	MAD2 mitotic arrest deficient-like 1 (yeast)
209173_at	-3.717	0.11041	0.14142	0.0002	-3.836	0.01853	0.74286	30267.2	22484.2	anterior gradient 2 homolog (Xenopus laevis)
205680_at	-3.722	0.10923	0.14086	0.0002	-3.025	0.03899	0.52225	11503.1	6007.48	matrix metalloproteinase 10 (stromelysin 2)
204162_at	-3.709	0.11276	0.14165	0.00021	-1.61	0.18264	0.2879	139.426	40.1412	kinetochore associated 2
209351_at	-3.699	0.11608	0.14165	0.00022	-2.695	0.0544	0.38621	8933.49	3450.17	keratin 14 (epidermolysis bullosa simplex, Dowling-Meara, Koebner)
205547_s_at	-3.654	0.13437	0.14217	0.00026	-1.66	0.17227	0.15822	29.4272	4.65589	transgelin
219978_s_at	-3.641	0.1386	0.14318	0.00027	-1.761	0.153	0.17848	181.66	32.4219	nucleolar and spindle associated protein 1
241120_s_at	-3.644	0.13852	0.14318	0.00027	-2.325	0.08068	0.25862	408.163	105.56	CDC20-like protein
221675_s_at	-3.626	0.14548	0.14549	0.00029	-1.267	0.27398	0.65552	2601.37	1705.24	choline phosphotransferase 1
206300_s_at	-3.589	0.16503	0.14859	0.00033	-2.691	0.05462	0.51979	3590.01	1866.05	parathyroid hormone-like hormone
218009_s_at	-3.579	0.17009	0.14859	0.00035	-1.622	0.18009	0.35816	392.117	140.44	protein regulator of cytokinesis 1
65588_at	-3.56	0.17915	0.14859	0.00037	-0.811	0.46291	0.42488	215.323	91.4859	hypothetical LOC388796
212481_s_at	-3.549	0.18514	0.14859	0.00039	-1.238	0.28349	0.56497	1904.74	1076.11	tropomyosin 4
202705_at	-3.538	0.18997	0.14901	0.0004	-2.457	0.06991	0.30306	437.97	132.731	cyclin B2
214710_s_at	-3.503	0.20956	0.14942	0.00046	-2.277	0.08503	0.2767	441.467	122.152	cyclin B1
39249_at	-3.495	0.21232	0.14942	0.00047	-1.542	0.19794	0.65863	7732.06	5092.58	aquaporin 3
213226_at	-3.499	0.21104	0.14942	0.00047	-1.704	0.16351	0.33374	345.54	115.321	cyclin A2
1567107_s_at	-3.477	0.22581	0.14942	0.00051	-0.999	0.37427	0.56338	1907.95	1074.9	tropomyosin 3 /// tropomyosin 4
208539_x_at	-3.467	0.23249	0.14942	0.00053	-5.132	0.00683	0.43175	1207.31	521.26	small proline-rich protein 2A
219493_at	-3.437	0.24975	0.14942	0.00059	-1.666	0.17095	0.22423	47.0475	10.5492	SHC SH2-domain binding protein 1
229659_s_at	-3.415	0.26573	0.14942	0.00064	-0.095	0.92875	0.93668	10829.8	10144.1	---
213655_at	-3.399	0.27808	0.14942	0.00068	-0.95	0.39611	0.75679	7425.43	5619.47	---
223381_at	-3.389	0.28428	0.14942	0.0007	-2.088	0.10504	0.30946	123.364	38.1763	cell division cycle associated 1
213757_at	-3.364	0.30284	0.14942	0.00077	-0.746	0.49715	0.6842	5419	3707.69	---
218796_at	-3.349	0.31619	0.14942	0.00081	-6.185	0.00347	0.39201	1126.98	441.783	chromosome 20 open reading frame 42
205081_at	-3.33	0.33664	0.14942	0.00087	-11.964	0.00028	0.52574	8350.58	4390.24	cysteine-rich protein 1 (intestinal)
210540_s_at	-3.32	0.34618	0.14942	0.0009	-1.365	0.24389	0.63084	4142.99	2613.56	UDP-Gal:betaGlcNAc beta 1,4- galactosyltransferase, polypeptide 4
212236_x_at	-3.316	0.34626	0.14942	0.00091	-4.789	0.00872	0.62255	14538.3	9050.87	keratin 17
202345_s_at	-3.317	0.34626	0.14942	0.00091	-2.36	0.07767	0.66044	29550.9	19516.6	fatty acid binding protein 5 (psoriasis-associated)
214580_x_at	-3.31	0.3471	0.14942	0.00093	-1.498	0.20854	0.70175	17610.5	12358.2	keratin 6A /// keratin 6B /// keratin 6C /// keratin 6E
201195_s_at	-3.311	0.3471	0.14942	0.00093	-1.096	0.3348	0.51421	1027.2	528.192	solute carrier family 7 (cationic amino acid transporter, y+ system), member 5
204948_s_at	-3.305	0.35112	0.14942	0.00095	-3.939	0.01698	0.28958	1456.35	421.73	follistatin
211088_s_at	-3.292	0.36517	0.14942	0.001	-3.087	0.03667	0.2882	47.9039	13.8058	polo-like kinase 4 (Drosophila) /// polo-like kinase 4 (Drosophila)
205064_at	-3.279	0.37663	0.14942	0.00104	-1.823	0.14243	0.55008	7062.33	3884.85	small proline-rich protein 1B (cornifin)
225857_s_at	-3.242	0.42466	0.14942	0.00119	-0.764	0.48739	0.58223	593.522	345.567	Hypothetical LOC388796
212097_at	-3.231	0.43519	0.14942	0.00123	-2.879	0.04504	0.4698	9099.13	4274.73	caveolin 1, caveolae protein, 22kDa
210021_s_at	-3.226	0.44073	0.14942	0.00126	-2.158	0.09711	0.53262	1566.68	834.443	uracil-DNA glycosylase 2
209344_at	-3.22	0.44383	0.14942	0.00128	-0.784	0.47685	0.7038	3017.59	2123.77	tropomyosin 4
239818_x_at	-3.22	0.44383	0.14942	0.00128	-0.475	0.65987	0.52406	20.4714	10.7282	---
202627_s_at	-3.211	0.45229	0.14942	0.00132	-2.308	0.08221	0.40868	1155.15	472.091	serine (or cysteine) proteinase inhibitor, clade E (nexin, plasminogen activator inhibitor type 1), member 1
217110_s_at	-3.206	0.45721	0.14942	0.00135	-1.273	0.27206	0.59099	2099.88	1241.01	mucin 4, tracheobronchial
206354_at	-3.203	0.45899	0.14942	0.00136	-1.196	0.29783	0.37237	125.306	46.6601	solute carrier organic anion transporter family, member 1B3
223278_at	-3.192	0.47107	0.1521	0.00141	-1.994	0.11694	0.7566	19055.6	14417.5	gap junction protein, beta 2, 26kDa (connexin 26)
218039_at	-3.174	0.49774	0.15475	0.00151	-1.51	0.20564	0.41707	797.938	332.793	nucleolar and spindle associated protein 1
204971_at	-3.154	0.52278	0.15501	0.00161	-1.572	0.19113	0.78599	25428	19986.1	cystatin A (stefin A)
204444_at	-3.153	0.52278	0.15501	0.00162	-1.397	0.2349	0.3682	189.634	69.8224	kinesin family member 11
1553995_a_at	-3.145	0.53166	0.15501	0.00166	-1.377	0.24069	0.2849	40.6528	11.582	5'-nucleotidase, ecto (CD73)
230378_at	-3.104	0.59655	0.15501	0.00191	-1.239	0.28303	0.91733	54290.5	49802.1	secretoglobin, family 3A, member 1
202503_s_at	-3.096	0.60001	0.15501	0.00196	-1.663	0.17168	0.48817	602.964	294.349	KIAA0101
209126_x_at	-3.097	0.60001	0.15501	0.00196	-2.337	0.07966	0.58436	9515.26	5560.37	keratin 6B
203924_at	-3.076	0.63056	0.15501	0.0021	-1.429	0.22633	0.71491	18539	13253.8	glutathione S-transferase A1
209101_at	-3.067	0.6416	0.15501	0.00216	-2.049	0.10985	0.59948	11057.6	6628.77	connective tissue growth factor
231067_s_at	-3.065	0.64223	0.15501	0.00217	-8.892	0.00088	0.1786	74.9546	13.387	---
204026_s_at	-3.03	0.71414	0.15592	0.00244	-2.112	0.10221	0.46629	1082.03	504.535	ZW10 interactor
218585_s_at	-3.022	0.72596	0.15592	0.00251	-2.111	0.1024	0.35711	59.0822	21.0987	RA-regulated nuclear matrix-associated protein
226811_at	-3.016	0.72869	0.15592	0.00256	-2.424	0.07248	0.46617	983.671	458.562	family with sequence similarity 46, member C
214091_s_at	-3.012	0.73591	0.15592	0.0026	-0.635	0.55999	0.76488	3192.38	2441.78	glutathione peroxidase 3 (plasma)
222102_at	-3.009	0.73886	0.15592	0.00262	-1.666	0.17104	0.65461	2446.33	1601.39	glutathione S-transferase A3
208502_s_at	-2.994	0.77115	0.16116	0.00275	-1.721	0.16032	0.52691	909.768	479.367	paired-like homeodomain transcription factor 1
228033_at	-2.985	0.78642	0.16222	0.00283	-2.189	0.09385	0.27927	704.967	196.876	E2F transcription factor 7
1555950_a_at	-2.984	0.78642	0.16222	0.00284	-2.914	0.04349	0.52277	5348.38	2795.96	decay accelerating factor for complement (CD55, Cromer blood group system)
211080_s_at	-2.984	0.78642	0.16222	0.00285	-2.025	0.11284	0.18348	441.701	81.0414	NIMA (never in mitosis gene a)-related kinase 2 /// NIMA (never in mitosis gene a)-related kinase 2
225664_at	-2.981	0.7881	0.16222	0.00287	-1.991	0.11734	0.241	607.612	146.433	collagen, type XII, alpha 1
227145_at	-2.975	0.79785	0.16222	0.00293	-0.921	0.40918	0.57969	1098.27	636.652	lysyl oxidase-like 4
205899_at	-2.975	0.79785	0.16222	0.00293	-1.4	0.23414	0.40496	2340.81	947.936	cyclin A1
203417_at	-2.964	0.82269	0.16433	0.00304	-1.225	0.28787	0.44775	233.291	104.455	microfibrillar-associated protein 2
204952_at	-2.943	0.87565	0.16485	0.00325	-1.759	0.15348	0.32023	334.599	107.148	GPI-anchored metastasis-associated protein homolog
205623_at	-2.933	0.88338	0.16485	0.00336	-2.677	0.05539	0.60616	17114.5	10374.1	aldehyde dehydrogenase 3 family, memberA1
1554921_a_at	-2.93	0.88483	0.16485	0.00339	-2.515	0.06568	0.24168	1268.79	306.642	sciellin
203571_s_at	-2.923	0.89109	0.16485	0.00347	-1.111	0.32893	0.50379	658.099	331.544	chromosome 10 open reading frame 116
208498_s_at	-2.92	0.89109	0.16485	0.0035	-0.434	0.68662	0.58202	1089.12	633.892	amylase, alpha 2A; pancreatic
208808_s_at	-2.92	0.89109	0.16485	0.0035	-3.304	0.02983	0.56245	6078.41	3418.83	high-mobility group box 2
214549_x_at	-2.915	0.8971	0.16485	0.00356	-1.826	0.14187	0.53658	4282.53	2297.91	small proline-rich protein 1A
202589_at	-2.911	0.90287	0.16485	0.0036	-2.883	0.04486	0.29383	487.769	143.319	thymidylate synthetase
203499_at	-2.902	0.91931	0.16485	0.00371	-1.253	0.27861	0.64696	2236.26	1446.76	EPH receptor A2
214385_s_at	-2.901	0.91931	0.16485	0.00372	-2.539	0.06407	0.0853	71.9311	6.1359	mucin 5, subtypes A and C, tracheobronchial/gastric
214771_x_at	-2.9	0.91975	0.16485	0.00373	-1.116	0.32695	0.65617	1050.83	689.522	myosin phosphatase-Rho interacting protein
239477_at	-2.888	0.92933	0.16492	0.00388	-1.579	0.18939	0.51158	3839.79	1964.36	EF hand domain family, member B
217992_s_at	-2.887	0.92989	0.16492	0.00389	-1.169	0.30714	0.63101	1399.57	883.145	EF hand domain family, member D2
202290_at	-2.87	0.96722	0.16492	0.0041	-1.189	0.30034	0.64091	809.789	518.998	PDGFA associated protein 1
201028_s_at	-2.863	0.97959	0.16492	0.00419	-1.22	0.28962	0.66427	2950.11	1959.68	CD99 antigen
210571_s_at	-2.857	0.99083	0.16492	0.00427	-0.855	0.44064	0.74527	2620.58	1953.04	Cytidine monophosphate-N-acetylneuraminic acid hydroxylase (CMP-N-acetylneuraminate monooxygenase)
1559072_a_at	-2.855	0.99193	0.16492	0.0043	-3.143	0.03476	0.21065	53.1702	11.2002	KIAA1904 protein
207913_at	-2.848	1	0.16601	0.00439	-0.855	0.44058	0.58356	2208.02	1288.51	cytochrome P450, family 2, subfamily F, polypeptide 1
208505_s_at	-2.839	1	0.1661	0.00453	-1.09	0.33697	0.57397	722.675	414.796	fucosyltransferase 2 (secretor status included)
202917_s_at	-2.829	1	0.1661	0.00467	-1.115	0.32733	0.8116	27827.7	22585.1	S100 calcium binding protein A8 (calgranulin A)
204887_s_at	-2.801	1	0.1661	0.0051	-2.951	0.04194	0.32635	323.473	105.567	polo-like kinase 4 (Drosophila)
203764_at	-2.8	1	0.1661	0.00511	-2.542	0.06385	0.30305	305.053	92.4457	discs, large homolog 7 (Drosophila)
225834_at	-2.8	1	0.1661	0.00511	-1.762	0.15283	0.39234	37.306	14.6365	Similar to RIKEN cDNA 2700049P18 gene
208791_at	-2.8	1	0.1661	0.00512	-1.246	0.28072	0.76315	14029.8	10706.9	clusterin (complement lysis inhibitor, SP-40,40, sulfated glycoprotein 2, testosterone-repressed prostate message 2, apolipoprotein J)
204822_at	-2.795	1	0.1661	0.00519	-2.894	0.04437	0.30746	47.8175	14.702	TTK protein kinase
205014_at	-2.792	1	0.1661	0.00524	-2.208	0.09186	0.60793	7620.08	4632.46	fibroblast growth factor binding protein 1
204420_at	-2.792	1	0.1661	0.00525	-0.919	0.41013	0.43203	51.9545	22.4457	FOS-like antigen 1
201481_s_at	-2.784	1	0.1661	0.00536	-1.678	0.16858	0.61351	1565	960.135	phosphorylase, glycogen; brain
60474_at	-2.783	1	0.1661	0.00539	-10.016	0.00056	0.46877	1293.74	606.468	chromosome 20 open reading frame 42
218888_s_at	-2.773	1	0.1661	0.00555	-2.46	0.06967	0.63864	1742.76	1112.99	neuropilin (NRP) and tolloid (TLL)-like 2
209714_s_at	-2.772	1	0.1661	0.00556	-1.434	0.22488	0.31627	43.9385	13.8966	cyclin-dependent kinase inhibitor 3 (CDK2-associated dual specificity phosphatase)
231472_at	-2.772	1	0.1661	0.00557	-1.76	0.15318	0.66828	2991.69	1999.3	F-box protein 15
222848_at	-2.763	1	0.1661	0.00572	-2.073	0.10683	0.49086	878.469	431.207	leucine zipper protein FKSG14
218663_at	-2.762	1	0.1661	0.00574	-1.829	0.14137	0.31311	60.1035	18.8193	chromosome condensation protein G
210845_s_at	-2.749	1	0.1661	0.00598	-1.872	0.13451	0.53907	827.183	445.907	plasminogen activator, urokinase receptor
204363_at	-2.745	1	0.1661	0.00605	-1.452	0.22004	0.74563	18824.4	14036	coagulation factor III (thromboplastin, tissue factor)
219727_at	-2.74	1	0.1661	0.00614	-2.704	0.05388	0.60323	1439.12	868.124	dual oxidase 2
209373_at	-2.735	1	0.1661	0.00623	-2.972	0.04107	0.51272	2777.65	1424.16	BENE protein
208300_at	-2.735	1	0.1661	0.00624	-2.697	0.05428	0.30794	160.538	49.4353	protein tyrosine phosphatase, receptor type, H
1554072_s_at	-2.735	1	0.1661	0.00624	-1.722	0.16015	0.39674	330.522	131.132	hypothetical protein FLJ25393
204146_at	-2.732	1	0.1661	0.00629	-2.571	0.0619	0.33703	244.821	82.5122	RAD51 associated protein 1
228729_at	-2.716	1	0.1661	0.0066	-1.736	0.15762	0.40065	619.54	248.219	cyclin B1
202998_s_at	-2.703	1	0.1661	0.00687	-1.472	0.21509	0.46954	741.424	348.128	lysyl oxidase-like 2
208937_s_at	-2.7	1	0.1661	0.00693	-3.316	0.02949	0.79728	24676.8	19674.3	inhibitor of DNA binding 1, dominant negative helix-loop-helix protein
204359_at	-2.697	1	0.1661	0.00701	-3.052	0.03796	0.23038	101.516	23.387	fibronectin leucine rich transmembrane protein 2
221253_s_at	-2.677	1	0.1661	0.00743	-2.718	0.05308	0.68201	5334.06	3637.87	thioredoxin domain containing 5 /// thioredoxin domain containing 5
201656_at	-2.666	1	0.1661	0.00767	-3.106	0.036	0.5988	6226.71	3728.52	integrin, alpha 6
217109_at	-2.665	1	0.1661	0.0077	-1.444	0.22233	0.67998	5130.95	3488.96	mucin 4, tracheobronchial
207826_s_at	-2.657	1	0.1661	0.00789	-3.631	0.02213	0.63444	3475.29	2204.86	inhibitor of DNA binding 3, dominant negative helix-loop-helix protein
229976_at	-2.656	1	0.1661	0.00791	-3.577	0.02323	0.63273	4913.71	3109.04	chromosome 9 open reading frame 18
209301_at	-2.653	1	0.1661	0.00798	-2.958	0.04162	0.30259	395.311	119.616	carbonic anhydrase II
209464_at	-2.652	1	0.1661	0.00801	-2.024	0.113	0.28421	53.8799	15.3132	aurora kinase B
205339_at	-2.646	1	0.1661	0.00814	-3.937	0.017	0.50561	1028.57	520.056	TAL1 (SCL) interrupting locus
201348_at	-2.645	1	0.1661	0.00816	-0.534	0.62151	0.80167	2517.16	2017.93	glutathione peroxidase 3 (plasma)
218662_s_at	-2.644	1	0.1661	0.00819	-1.154	0.31287	0.56586	355.914	201.398	chromosome condensation protein G
212197_x_at	-2.643	1	0.1661	0.00822	-1.374	0.2414	0.59838	941.698	563.489	myosin phosphatase-Rho interacting protein
214290_s_at	-2.643	1	0.1661	0.00823	-1.232	0.2853	0.70315	7203.2	5064.92	histone 2, H2aa
219118_at	-2.641	1	0.1661	0.00828	-4.347	0.01219	0.33015	369.248	121.908	FK506 binding protein 11, 19 kDa
201564_s_at	-2.634	1	0.1661	0.00843	-0.99	0.37819	0.66325	1353.24	897.534	fascin homolog 1, actin-bundling protein (Strongylocentrotus purpuratus)
216971_s_at	-2.629	1	0.16639	0.00857	-1.221	0.28905	0.36342	584.39	212.379	plectin 1, intermediate filament binding protein 500kDa
227676_at	-2.627	1	0.16639	0.00861	-6.322	0.0032	0.58029	3022.4	1753.88	family with sequence similarity 3, member D
204825_at	-2.617	1	0.16861	0.00886	-3.067	0.03739	0.49157	717.999	352.946	maternal embryonic leucine zipper kinase
213572_s_at	-2.615	1	0.16861	0.00892	-1.915	0.12793	0.80017	17796.2	14239.9	serine (or cysteine) proteinase inhibitor, clade B (ovalbumin), member 1
238229_at	-2.613	1	0.16861	0.00896	-1.928	0.12613	0.58552	940.83	550.876	Hypothetical protein MGC26979
218340_s_at	-2.612	1	0.16861	0.00899	-0.647	0.553	0.63092	576.026	363.425	hypothetical protein FLJ10808
1565717_s_at	-2.609	1	0.16861	0.00908	-1.135	0.31983	0.17426	739.142	128.801	fusion (involved in t(12;16) in malignant liposarcoma)
223333_s_at	-2.608	1	0.16861	0.0091	-2.724	0.05277	0.3535	27.6957	9.79047	angiopoietin-like 4
213338_at	-2.605	1	0.16861	0.00918	-1.228	0.28669	0.27056	26.8481	7.26416	Ras-induced senescence 1
230333_at	-2.604	1	0.16861	0.00923	-1.18	0.30326	0.58369	2839.91	1657.64	Spermidine/spermine N1-acetyltransferase
235252_at	-2.593	1	0.16861	0.00951	-2.24	0.08864	0.53341	573.427	305.872	Kinase suppressor of ras
203939_at	-2.591	1	0.16861	0.00958	-1.586	0.18802	0.31947	317.729	101.505	5'-nucleotidase, ecto (CD73)
208792_s_at	-2.589	1	0.16869	0.00963	-1.101	0.33255	0.77567	13776.2	10685.8	clusterin (complement lysis inhibitor, SP-40,40, sulfated glycoprotein 2, testosterone-repressed prostate message 2, apolipoprotein J)
204855_at	-2.589	1	0.16878	0.00964	-1.197	0.29725	0.76655	7457.78	5716.79	serine (or cysteine) proteinase inhibitor, clade B (ovalbumin), member 5
209189_at	-2.581	1	0.16886	0.00985	-1.166	0.30839	0.64168	846.847	543.404	v-fos FBJ murine osteosarcoma viral oncogene homolog
210608_s_at	-2.562	1	0.1715	0.0104	-0.481	0.65579	0.81882	3411.94	2793.77	fucosyltransferase 2 (secretor status included)
202267_at	-2.558	1	0.17215	0.01052	-12.758	0.00022	0.59353	5412.67	3212.57	laminin, gamma 2
232056_at	-2.555	1	0.1728	0.01062	-3.887	0.01774	0.45808	889.592	407.501	sciellin
209050_s_at	-2.548	1	0.17301	0.01082	-1.881	0.13307	0.58376	1221.1	712.835	ral guanine nucleotide dissociation stimulator
225655_at	-2.543	1	0.17301	0.011	-2.828	0.04744	0.42874	303.343	130.054	ubiquitin-like, containing PHD and RING finger domains, 1
201842_s_at	-2.539	1	0.17421	0.01111	-5.816	0.00435	0.61179	7024.09	4297.23	EGF-containing fibulin-like extracellular matrix protein 1
230165_at	-2.53	1	0.18	0.01141	-2.367	0.07707	0.39608	277.014	109.721	---
1554768_a_at	-2.525	1	0.18174	0.01157	-2.165	0.0964	0.1889	621.552	117.408	MAD2 mitotic arrest deficient-like 1 (yeast)
207165_at	-2.515	1	0.18251	0.01189	-0.768	0.48514	0.56801	218.237	123.96	hyaluronan-mediated motility receptor (RHAMM)
225687_at	-2.495	1	0.18445	0.01258	-1.826	0.14195	0.49305	437.559	215.74	chromosome 20 open reading frame 129
201325_s_at	-2.486	1	0.18616	0.01291	-2.84	0.04687	0.44887	1006.22	451.662	epithelial membrane protein 1
200790_at	-2.485	1	0.18616	0.01297	-3.831	0.0186	0.60282	2841.59	1712.98	ornithine decarboxylase 1
204457_s_at	-2.484	1	0.18616	0.013	-0.477	0.6585	0.83082	4050.28	3365.07	growth arrest-specific 1
203028_s_at	-2.479	1	0.18676	0.01317	-2.609	0.05951	0.69022	7493.69	5172.28	cytochrome b-245, alpha polypeptide
218309_at	-2.476	1	0.18684	0.01327	-0.555	0.60853	0.68309	824.699	563.345	calcium/calmodulin-dependent protein kinase II
1556003_a_at	-2.476	1	0.18684	0.01328	-0.923	0.40822	0.58015	6050.36	3510.14	---
220425_x_at	-2.475	1	0.18747	0.01334	-2.213	0.09133	0.2512	62.9364	15.8096	ropporin, rhophilin associated protein 1 /// similar to AKAP-binding sperm protein ropporin
217753_s_at	-2.472	1	0.18747	0.01343	-1.16	0.31041	0.79605	14822.7	11799.6	ribosomal protein S26
208084_at	-2.471	1	0.18747	0.01346	-1.219	0.28967	0.21091	1416.79	298.81	integrin, beta 6
1552950_at	-2.459	1	0.18924	0.01392	-2.091	0.10473	0.55095	1965.63	1082.97	chromosome 15 open reading frame 26
210379_s_at	-2.456	1	0.18924	0.01406	-0.65	0.5514	0.48255	148.65	71.7317	tousled-like kinase 1
225656_at	-2.454	1	0.18924	0.01414	-2.906	0.04387	0.2621	413.705	108.432	EF-hand domain (C-terminal) containing 1
206364_at	-2.45	1	0.18924	0.01429	-2.622	0.05867	0.27309	70.5767	19.2735	kinesin family member 14
203747_at	-2.446	1	0.18926	0.01443	-1.46	0.21797	0.73485	5612.69	4124.46	aquaporin 3
1554140_at	-2.428	1	0.19441	0.01519	-1.611	0.18247	0.62937	1430.48	900.3	hypothetical protein FLJ23129
223316_at	-2.425	1	0.19642	0.01531	-0.36	0.73702	0.46831	217.788	101.992	coiled-coil domain containing 3
228946_at	-2.419	1	0.19791	0.01555	-1.178	0.30412	0.51643	67.3716	34.7925	PDZ domain containing 6
204577_s_at	-2.412	1	0.19888	0.01587	-0.879	0.42893	0.66943	952.102	637.365	clusterin associated protein 1
214303_x_at	-2.41	1	0.19936	0.01597	-2.226	0.08999	0.094	73.7621	6.93394	mucin 5, subtypes A and C, tracheobronchial/gastric
203585_at	-2.405	1	0.2008	0.01619	-1.12	0.32537	0.7302	1943.82	1419.37	zinc finger protein 185 (LIM domain)
211756_at	-2.403	1	0.2008	0.01627	-3.245	0.03152	0.66547	7416.7	4935.63	parathyroid hormone-like hormone /// parathyroid hormone-like hormone
204475_at	-2.401	1	0.2008	0.01633	-2.424	0.07248	0.34386	1777.23	611.112	matrix metalloproteinase 1 (interstitial collagenase)
217007_s_at	-2.387	1	0.20416	0.01698	-1.614	0.18172	0.5596	663.772	371.445	a disintegrin and metalloproteinase domain 15 (metargidin)
39248_at	-2.382	1	0.20552	0.01724	-1.559	0.19391	0.9124	41334.2	37713.3	aquaporin 3
206276_at	-2.363	1	0.211	0.01814	-1.371	0.24227	0.68187	1553.36	1059.18	lymphocyte antigen 6 complex, locus D
202628_s_at	-2.36	1	0.211	0.01827	-2.512	0.06588	0.34369	789.707	271.411	serine (or cysteine) proteinase inhibitor, clade E (nexin, plasminogen activator inhibitor type 1), member 1
203554_x_at	-2.351	1	0.211	0.0187	-1.678	0.16869	0.56734	1189.61	674.916	pituitary tumor-transforming 1
203968_s_at	-2.351	1	0.211	0.01874	-1.697	0.16503	0.45453	21.5861	9.81148	CDC6 cell division cycle 6 homolog (S. cerevisiae)
239216_at	-2.35	1	0.211	0.01879	-2.827	0.0475	0.58756	4543.87	2669.78	tektin 1
230936_at	-2.347	1	0.211	0.01893	-1.635	0.17738	0.57537	1088.69	626.404	testis spermatogenesis apoptosis-related protein 6
210935_s_at	-2.347	1	0.211	0.01893	-1.048	0.35364	0.46154	4389.02	2025.72	WD repeat domain 1
222774_s_at	-2.345	1	0.211	0.01903	-1.857	0.13685	0.63379	886.758	562.014	neuropilin (NRP) and tolloid (TLL)-like 2
236140_at	-2.342	1	0.211	0.01917	-0.606	0.57732	0.83108	3637.24	3022.82	glutamate-cysteine ligase, modifier subunit
215243_s_at	-2.342	1	0.211	0.0192	-2.234	0.08926	0.55871	1415.87	791.053	gap junction protein, beta 3, 31kDa (connexin 31)
238180_at	-2.333	1	0.21184	0.01964	-2.116	0.10178	0.59601	722.678	430.727	Mucin 11
230615_at	-2.324	1	0.21305	0.02014	-1.536	0.19938	0.42394	132.731	56.2695	similar to Numb-interacting homolog gene
201565_s_at	-2.323	1	0.21305	0.02017	-3.697	0.02088	0.67972	6541.77	4446.58	inhibitor of DNA binding 2, dominant negative helix-loop-helix protein
238741_at	-2.322	1	0.21305	0.02023	-0.794	0.47148	0.77381	1285.26	994.553	hypothetical protein MGC14128
210118_s_at	-2.318	1	0.2148	0.02044	-1.302	0.26268	0.41022	263.123	107.938	interleukin 1, alpha
206336_at	-2.316	1	0.21521	0.02054	-1.238	0.28348	0.65662	11347.2	7450.82	chemokine (C-X-C motif) ligand 6 (granulocyte chemotactic protein 2)
226226_at	-2.311	1	0.2178	0.02082	-5.852	0.00425	0.65824	4443.92	2925.19	transmembrane protein 45B
217733_s_at	-2.309	1	0.21864	0.02092	-0.903	0.41761	0.9066	29183.4	26457.8	thymosin, beta 10
218755_at	-2.304	1	0.22075	0.02121	-1.992	0.11718	0.40205	220.595	88.6903	kinesin family member 20A
228969_at	-2.304	1	0.22108	0.02123	-2.336	0.07972	0.62687	6569.63	4118.29	anterior gradient 2 homolog (Xenopus laevis)
1552612_at	-2.303	1	0.22108	0.02127	-0.792	0.47265	0.41331	327.182	135.228	---
206467_x_at	-2.302	1	0.2219	0.02133	-2.175	0.09529	0.44828	70.8242	31.7492	tumor necrosis factor receptor superfamily, member 6b, decoy /// regulator of telomere elongation helicase 1
202855_s_at	-2.296	1	0.22255	0.02167	-0.843	0.44651	0.74473	4036.88	3006.37	solute carrier family 16 (monocarboxylic acid transporters), member 3
227337_at	-2.294	1	0.22255	0.02177	-3.038	0.03848	0.52299	4109.65	2149.32	low density lipoprotein receptor-related protein binding protein
214455_at	-2.294	1	0.22255	0.02177	-1.568	0.19194	0.405	530.839	214.987	---
213239_at	-2.287	1	0.22597	0.02218	-2.043	0.11062	0.63702	1666.01	1061.28	chromosome 13 open reading frame 24
231389_at	-2.279	1	0.2293	0.02268	-3.158	0.03426	0.5684	3066.76	1743.14	chromosome X open reading frame 41
211924_s_at	-2.278	1	0.2293	0.02271	-1.62	0.18046	0.62154	1182.73	735.114	plasminogen activator, urokinase receptor /// plasminogen activator, urokinase receptor
211077_s_at	-2.274	1	0.23182	0.02296	-0.407	0.70505	0.65673	95.2872	62.578	tousled-like kinase 1 /// tousled-like kinase 1
210186_s_at	-2.265	1	0.23381	0.02351	-0.793	0.47203	0.64259	1763.7	1133.34	FK506 binding protein 1A, 12kDa
218709_s_at	-2.256	1	0.23673	0.02406	-3.235	0.03182	0.5919	1942.42	1149.71	chromosome 20 open reading frame 9
211715_s_at	-2.247	1	0.23826	0.02464	-0.807	0.46517	0.7602	1365.81	1038.3	3-hydroxybutyrate dehydrogenase (heart, mitochondrial) /// 3-hydroxybutyrate dehydrogenase (heart, mitochondrial)
213924_at	-2.243	1	0.2403	0.02489	-0.908	0.41505	0.7498	1590.73	1192.73	CHMP1.5 protein
225812_at	-2.232	1	0.2403	0.0256	-3.438	0.02634	0.6889	6307.66	4345.36	MRNA; cDNA DKFZp586F0922 (from clone DKFZp586F0922)
207463_x_at	-2.229	1	0.2403	0.0258	-0.36	0.73737	0.68427	18.3066	12.5266	protease, serine, 3 (mesotrypsin)
228273_at	-2.223	1	0.24229	0.02622	-0.504	0.64059	0.64236	263.035	168.963	Hypothetical protein FLJ11029
210933_s_at	-2.22	1	0.24273	0.02645	-0.628	0.56426	0.8515	3035.55	2584.77	fascin homolog 1, actin-bundling protein (Strongylocentrotus purpuratus)
222108_at	-2.219	1	0.24273	0.02648	-1.728	0.15908	0.48282	758.201	366.076	amphoterin induced gene 2
201040_at	-2.219	1	0.24273	0.0265	-1.211	0.29261	0.71622	886.996	635.284	guanine nucleotide binding protein (G protein), alpha inhibiting activity polypeptide 2
204709_s_at	-2.217	1	0.24357	0.02663	-1.888	0.13208	0.26291	123.347	32.4295	kinesin family member 23
223732_at	-2.215	1	0.24357	0.02676	-0.373	0.72798	0.75339	37.7116	28.4115	solute carrier family 23 (nucleobase transporters), member 1
230206_at	-2.211	1	0.2445	0.02702	-1.24	0.28264	0.53608	833.676	446.914	---
205398_s_at	-2.209	1	0.24512	0.02717	-1.393	0.23609	0.66479	1054	700.693	SMAD, mothers against DPP homolog 3 (Drosophila)
244741_s_at	-2.206	1	0.24583	0.02741	-0.754	0.49282	0.57984	418.266	242.528	hypothetical protein MGC9913
220105_at	-2.204	1	0.24683	0.02754	-6.048	0.00377	0.42855	526.119	225.468	rhabdoid tumor deletion region gene 1
227506_at	-2.2	1	0.24995	0.02779	-2.196	0.09306	0.55075	1697.39	934.838	solute carrier family 16 (monocarboxylic acid transporters), member 9
209116_x_at	-2.194	1	0.25111	0.02827	-3.201	0.03287	0.42228	384.566	162.394	hemoglobin, beta /// hemoglobin, beta
223199_at	-2.192	1	0.25111	0.02837	-0.428	0.69094	0.88546	3745.55	3316.53	MAP kinase interacting serine/threonine kinase 2
218717_s_at	-2.192	1	0.25111	0.02837	-1.188	0.30042	0.42618	15.9062	6.77888	leprecan-like 1
1555812_a_at	-2.183	1	0.25163	0.02906	-1.787	0.1485	0.41788	984.31	411.322	Rho GDP dissociation inhibitor (GDI) beta
209604_s_at	-2.182	1	0.25163	0.02913	-0.493	0.6479	0.70643	147.44	104.156	GATA binding protein 3
205979_at	-2.174	1	0.25359	0.02971	-1.42	0.22858	0.68912	2071.47	1427.5	secretoglobin, family 2A, member 1
201014_s_at	-2.172	1	0.25359	0.02983	-1.992	0.11723	0.62131	1544.57	959.661	phosphoribosylaminoimidazole carboxylase, phosphoribosylaminoimidazole succinocarboxamide synthetase
236193_at	-2.171	1	0.25359	0.02994	-4.229	0.01338	0.36711	98.162	36.0359	Transcribed locus
208152_s_at	-2.17	1	0.25359	0.02997	-1.251	0.27926	0.71357	1940.8	1384.89	DEAD (Asp-Glu-Ala-Asp) box polypeptide 21 /// DEAD (Asp-Glu-Ala-Asp) box polypeptide 21
220390_at	-2.162	1	0.25546	0.03063	-2.895	0.04435	0.49278	1047.36	516.121	hypothetical protein FLJ23598
204380_s_at	-2.161	1	0.25546	0.03071	-2.299	0.08304	0.44193	392.51	173.462	fibroblast growth factor receptor 3 (achondroplasia, thanatophoric dwarfism)
231565_at	-2.159	1	0.2555	0.03084	-2.442	0.07105	0.56074	1344.49	753.91	hypothetical protein MGC35043
212859_x_at	-2.157	1	0.2555	0.03098	-3.109	0.03592	0.72591	9912.05	7195.23	metallothionein 1E (functional)
205863_at	-2.154	1	0.2558	0.03127	-1.546	0.19701	0.3567	95.1519	33.9407	S100 calcium binding protein A12 (calgranulin C) /// S100 calcium binding protein A12 (calgranulin C)
228726_at	-2.148	1	0.25773	0.03172	-0.87	0.43357	0.85177	12549.1	10689	Serine (or cysteine) proteinase inhibitor, clade B (ovalbumin), member 1
1559584_a_at	-2.147	1	0.25773	0.03176	-1.122	0.32457	0.47247	76.0807	35.9459	hypothetical protein FLJ35681
1568924_a_at	-2.143	1	0.25789	0.03208	-2.223	0.09028	0.4897	1119.55	548.247	hypothetical protein FLJ35834
224583_at	-2.138	1	0.26027	0.0325	-0.983	0.38114	0.70504	674.046	475.232	coactosin-like 1 (Dictyostelium)
218368_s_at	-2.133	1	0.26128	0.03289	-1.833	0.14077	0.49394	2287.06	1129.67	tumor necrosis factor receptor superfamily, member 12A
234853_s_at	-2.111	1	0.26838	0.03475	-0.976	0.38441	0.54165	28.0924	15.2162	CAP-binding protein complex interacting protein 1
205436_s_at	-2.11	1	0.26884	0.03482	-2.461	0.06965	0.60445	2431.88	1469.96	H2A histone family, member X
201596_x_at	-2.109	1	0.27016	0.03498	-2.123	0.10098	0.78692	10132.3	7973.28	keratin 18
218280_x_at	-2.104	1	0.27062	0.03537	-1.26	0.27629	0.72682	3152.33	2291.19	histone 2, H2aa
212444_at	-2.1	1	0.27196	0.03573	-2.637	0.05776	0.70251	4131.7	2902.57	CDNA clone IMAGE:6025865, partial cds
206033_s_at	-2.099	1	0.27196	0.03583	-0.893	0.42251	0.71723	733.017	525.745	desmocollin 3
1552957_at	-2.098	1	0.27196	0.03592	-3.508	0.02472	0.37604	184.702	69.4544	similar to Dynein heavy chain at 16F
235644_at	-2.097	1	0.27196	0.03596	-2.089	0.10493	0.59136	892.34	527.694	hypothetical protein FLJ32745
202205_at	-2.094	1	0.27205	0.03627	-0.995	0.37592	0.80007	1847.34	1478.01	vasodilator-stimulated phosphoprotein
210534_s_at	-2.094	1	0.27205	0.03628	-2.075	0.1066	0.66058	1844.78	1218.61	B9 protein
224204_x_at	-2.088	1	0.27477	0.0368	-3.702	0.0208	0.30107	148.217	44.6244	aryl hydrocarbon receptor nuclear translocator-like 2
222162_s_at	-2.079	1	0.27709	0.0376	-2.649	0.05707	0.4164	152.512	63.5055	a disintegrin-like and metalloprotease (reprolysin type) with thrombospondin type 1 motif, 1
225898_at	-2.078	1	0.27709	0.03768	-6.192	0.00346	0.687	4198.17	2884.12	WD repeat domain 54
204895_x_at	-2.077	1	0.27709	0.03777	-1.616	0.18151	0.54318	584.466	317.469	mucin 4, tracheobronchial
243943_x_at	-2.077	1	0.27709	0.0378	-3.178	0.03359	0.44055	465.127	204.913	---
210355_at	-2.075	1	0.27709	0.03795	-3.281	0.03048	0.7073	5065.14	3582.55	parathyroid hormone-like hormone
201926_s_at	-2.073	1	0.27771	0.03818	-2.782	0.04971	0.56243	5038.88	2834.04	decay accelerating factor for complement (CD55, Cromer blood group system)
203726_s_at	-2.073	1	0.27771	0.03821	-1.665	0.17115	0.68921	1312.01	904.249	laminin, alpha 3
203934_at	-2.072	1	0.27794	0.03831	-0.693	0.52631	0.50179	34.891	17.5081	kinase insert domain receptor (a type III receptor tyrosine kinase)
1555203_s_at	-2.07	1	0.27794	0.03842	-1.086	0.33872	0.35145	8456.34	2971.95	chromosome 6 open reading frame 29
228698_at	-2.066	1	0.27794	0.03881	-1.319	0.25769	0.68598	2564.32	1759.07	SRY (sex determining region Y)-box 7
228498_at	-2.049	1	0.28103	0.0405	-0.157	0.8826	0.91654	5638.65	5168.06	---
203108_at	-2.046	1	0.28108	0.04079	-1.882	0.13303	0.60143	8734.6	5253.23	G protein-coupled receptor, family C, group 5, member A
1554408_a_at	-2.044	1	0.28218	0.04097	-1.323	0.25653	0.47788	97.9069	46.7881	thymidine kinase 1, soluble
213975_s_at	-2.04	1	0.28371	0.04135	-2.175	0.09526	0.54787	911.924	499.62	lysozyme (renal amyloidosis) /// leukocyte immunoglobulin-like receptor, subfamily B (with TM and ITIM domains), member 1
206724_at	-2.038	1	0.28375	0.04156	-2.2	0.09261	0.36127	27.7385	10.0212	chromobox homolog 4 (Pc class homolog, Drosophila)
238843_at	-2.035	1	0.28419	0.04186	-5.519	0.00526	0.57546	1101.18	633.686	nephronophthisis 1 (juvenile)
223229_at	-2.032	1	0.28419	0.04214	-2.369	0.0769	0.38501	595.319	229.205	HSPC150 protein similar to ubiquitin-conjugating enzyme
220723_s_at	-2.031	1	0.28419	0.04225	-0.714	0.51463	0.78242	937.05	733.163	hypothetical protein FLJ21511
201930_at	-2.031	1	0.28471	0.04229	-1.136	0.3193	0.59748	324.219	193.713	MCM6 minichromosome maintenance deficient 6 (MIS5 homolog, S. pombe) (S. cerevisiae)
242944_at	-2.028	1	0.28558	0.04261	-1.263	0.27512	0.32306	848.5	274.117	hypothetical protein MGC14128
201167_x_at	-2.025	1	0.28561	0.04283	-0.901	0.41874	0.5597	454.821	254.563	Rho GDP dissociation inhibitor (GDI) alpha
1558077_s_at	-2.024	1	0.28561	0.04299	-3.774	0.01953	0.55992	1713.63	959.501	malate dehydrogenase 1B, NAD (soluble)
209212_s_at	-2.019	1	0.28617	0.04352	-1.742	0.15648	0.74354	6971.55	5183.61	Kruppel-like factor 5 (intestinal)
219260_s_at	-2.016	1	0.28635	0.04381	-0.33	0.75806	0.83344	1063.19	886.106	S-phase 2 protein
209051_s_at	-2.013	1	0.28702	0.04414	-1.482	0.21248	0.46513	283.738	131.975	ral guanine nucleotide dissociation stimulator
1554397_s_at	-2	1	0.29318	0.04546	-1.358	0.24615	0.23852	391.075	93.2808	ubiquitin-conjugating enzyme E2-like
202483_s_at	-1.998	1	0.2932	0.0457	-3.013	0.03942	0.7308	3803.45	2779.58	RAN binding protein 1
202226_s_at	-1.997	1	0.2932	0.04587	-1.14	0.31792	0.70728	925.465	654.561	v-crk sarcoma virus CT10 oncogene homolog (avian)
221764_at	-1.995	1	0.29399	0.04602	-1.768	0.1518	0.7367	1609.48	1185.7	chromosome 19 open reading frame 22
210018_x_at	-1.994	1	0.29415	0.04616	-1.753	0.15441	0.43684	12.7853	5.58519	mucosa associated lymphoid tissue lymphoma translocation gene 1
201324_at	-1.986	1	0.29744	0.04698	-2.911	0.04362	0.60941	2095.74	1277.17	epithelial membrane protein 1
209309_at	-1.985	1	0.29744	0.04713	-1.552	0.19565	0.39719	198.696	78.9205	alpha-2-glycoprotein 1, zinc
203404_at	-1.983	1	0.29774	0.04733	-1.027	0.36233	0.62884	1043.79	656.379	armadillo repeat containing, X-linked 2
219795_at	-1.98	1	0.29911	0.04765	-1.525	0.20184	0.85673	22025	18869.5	solute carrier family 6 (neurotransmitter transporter), member 14
206315_at	-1.98	1	0.29911	0.04774	-0.964	0.38948	0.52302	329.586	172.379	cytokine receptor-like factor 1
243610_at	-1.979	1	0.29911	0.04776	-1.773	0.15093	0.76997	11470.4	8831.82	hypothetical protein FLJ14966
242787_at	-1.978	1	0.29911	0.04793	-1.29	0.26647	0.52771	19.1419	10.1014	Inner centromere protein antigens 135/155kDa
201043_s_at	-1.977	1	0.30017	0.04806	-0.187	0.86075	0.93006	1032.05	959.868	acidic (leucine-rich) nuclear phosphoprotein 32 family, member A
222077_s_at	-1.976	1	0.30017	0.04812	-1.19	0.29969	0.68593	1136.59	779.617	Rac GTPase activating protein 1
228057_at	-1.97	1	0.30383	0.04886	-0.856	0.44003	0.5712	29.1848	16.6702	DNA-damage-inducible transcript 4-like
1563357_at	-1.965	1	0.30567	0.04942	-1.154	0.31287	0.51838	241.472	125.174	---
1552463_at	-1.964	1	0.30567	0.0495	-2.048	0.10996	0.44951	325.485	146.308	serine (or cysteine) proteinase inhibitor, clade B (ovalbumin), member 11
218804_at	-1.963	1	0.30567	0.04963	-2.183	0.09444	0.18298	46.475	8.50395	transmembrane protein 16A
201850_at	-1.962	1	0.30567	0.04976	-0.606	0.57727	0.78411	1818.18	1425.65	capping protein (actin filament), gelsolin-like
203908_at	-1.961	1	0.30567	0.04986	-1.073	0.34363	0.57572	1019.66	587.041	solute carrier family 4, sodium bicarbonate cotransporter, member 4
235273_at	-1.96	1	0.30567	0.04999	-1.914	0.12814	0.64735	3306.28	2140.33	dyslexia susceptibility 1 candidate 1

[truncated: 2 more sheets: Up AZT72hr SMM24hr vs SMM 24hr, Down AZT72hr SMM24hr vs SMM24hr]
